# Supplementary material for: Overriding the alkynophilicity of gold: catalytic pathways from higher energy Au(i)–substrate complexes and reactant deactivation via unproductive complexation in the gold(i)-catalyzed propargyl Claisen rearrangement
Source: Royal Society of Chemistry journal article supplement (doi:10.1039/c2ob27231h), 2012-11-26
Supplement: c2ob27231h.pdf [file c2ob27231h.pdf]

## Supporting Information

### Table of Contents

|                                                                                                                                                |     |
|------------------------------------------------------------------------------------------------------------------------------------------------|-----|
| General Consideration.....                                                                                                                     | S2  |
| General procedure for vinylation of alcohols.....                                                                                              | S2  |
| Experimental data for the vinyl ethers ( <b>1-7</b> ).....                                                                                     | S3  |
| General procedure for the gold(I)-catalyzed propargyl Claisen Rearrangement.....                                                               | S7  |
| Experimental data for the allene ( <b>8-14</b> ).....                                                                                          | S7  |
| Spectra of compounds <b>1-14</b> .....                                                                                                         | S13 |
| Details of computational method used in this study.....                                                                                        | S41 |
| Correlation of Hammett constants and the activation energies.....                                                                              | S41 |
| Computational data for the rearrangement emanating from gold(I)-coordinated VE....                                                             | S41 |
| Computational data for the gold(I)-catalyzed cyclization mediated pathway.....                                                                 | S53 |
| Computational data for the gold(I)-catalyzed cation-accelerated oxonia Claisen<br>rearrangement.....                                           | S60 |
| Computational data for the uncatalyzed propargyl Claisen rearrangement.....                                                                    | S74 |
| HOMA calculations.....                                                                                                                         | S78 |
| B3LYP/6-31G(d,p) transition state structures for the uncatalyzed Claisen rearrangement<br>of the phenyl-substituted propargyl vinyl ether..... | S78 |
| Isotropic shifts of ghost atom (Bq) calculated at the geometric center of TS ring-<br>NICS(0).....                                             | S79 |

**General Consideration.** All commercially procured chemicals were used as received. Dichloromethane (DCM), tetrahydrofuran (THF), triethylamine (Et<sub>3</sub>N), diethyl ether (Et<sub>2</sub>O) were distilled from calcium hydride (CaH<sub>2</sub>). Tetrahydrofuran (THF) was distilled from lithium aluminum hydride (LAH). Reagent grade solvents were used for solvent extraction and organic extracts were dried over anhydrous sodium sulfate (Na<sub>2</sub>SO<sub>4</sub>). Silica gel 60 (230-400 mesh ASTM) was used for Flash Chromatography with dry hexane/ethyl acetate eluent system. <sup>1</sup>H NMR spectra were recorded on 700 MHz Bruker, 500 MHz Varian, 500 MHz Bruker, 400 MHz Varian, or 300 MHz Varian spectrometers. <sup>13</sup>C spectra were recorded on 75 MHz Varian spectrometers. The proton chemical shifts (δ) are reported as parts per million relative to 7.26 ppm for CDCl<sub>3</sub>, 7.14 ppm for C<sub>6</sub>D<sub>6</sub>, 5.32 for CD<sub>2</sub>Cl<sub>2</sub>. The carbon chemical shifts (δ) were reported as the centerline of triplet at 77.0 ppm for CDCl<sub>3</sub>, quintet at 54.00 ppm for CD<sub>2</sub>Cl<sub>2</sub> and triplet at 128.0 for C<sub>6</sub>D<sub>6</sub>. Infrared spectra were recorded on sodium chloride plates using a Perkin-Elmer FT-IR Paragon 1000 spectrometer and frequencies were reported as reciprocal of centimeters (cm<sup>-1</sup>). Mass spectra were recorded using a Jeol JMS-600 instrument. The computations were performed using Gaussian03 on High Performance Computing facility (HPC) at Florida State University.

#### **General Procedure for Vinylation of Alcohols:**

To a 0.1M solution of 1-(4-methoxyphenyl)non-2-yn-1-ol (1mmol) in ethyl vinyl ether was added 0.6 mmol of mercuric acetate. The reaction mixture was refluxed at 45 °C for 12 hours before quenching with a saturated aqueous sodium carbonate solution. The organic phase was extracted using diethyl ether and dried over anhydrous potassium carbonate. The solvent was removed under vacuum and the crude vinyl ether was purified on alumina gel column using hexane as an eluent. Vinyl ether **11** was obtained in 45% yield (0.12g).

### Vinyl Ether 1

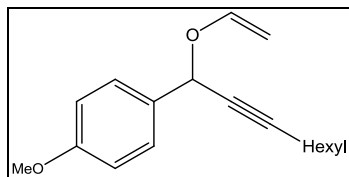

**$^1\text{H NMR}$**  (300 MHz,  $\text{C}_6\text{D}_6$ )  $\delta$ : 7.42 (d,  $J = 8.8$  Hz, 2H), 6.93 (dd,  $J = 19.4, 8.8$  Hz, 2H), 6.49 (dd,  $J = 14.1, 6.6$  Hz, 1H), 5.45 (s, 1H), 4.43 (dd,  $J = 14.1, 1.5$  Hz, 1H), 4.12 (dd,  $J = 6.6, 1.5$  Hz, 1H), 3.80 (s, 3H), 2.28 (td,  $J = 7.0, 1.9$  Hz, 2H), 1.61 – 1.47 (m, 2H), 1.47 – 1.20 (m, 6H), 0.89 (t,  $J = 6.7$  Hz, 3H).

**$^{13}\text{C NMR}$**  (75 MHz,  $\text{CD}_2\text{Cl}_2$ )  $\delta$ : 160.07, 149.77, 130.75, 128.96, 113.92, 89.93, 89.56, 77.36, 71.04, 55.47, 31.51, 28.72, 22.77, 18.90, 14.03.

**FTIR** (neat): 3115, 3069, 3038, 3001, 2955, 2932, 2858, 2281, 2226, 2056, 2026, 1892, 1727, 1636, 1611, 1587, 1513, 1464, 1304, 1250, 1171, 1140, 1108, 1033.

**HRMS** (EI+) Calcd. For  $\text{C}_{18}\text{H}_{24}\text{O}_2$  ( $\text{M}^+$ ): 272.17763, Found: 272.17747.

### Vinyl Ether 2

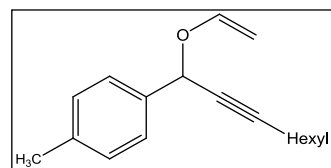

**$^1\text{H NMR}$**  (300 MHz,  $\text{CD}_2\text{Cl}_2$ )  $\delta$ : 7.57 – 7.08 (m, 4H), 6.50 (dd,  $J = 14.1, 6.6$  Hz, 1H), 5.48 (s, 1H), 4.44 (dd,  $J = 14.1, 1.7$  Hz, 1H), 4.14 (dd,  $J = 6.6, 1.7$  Hz, 1H), 2.37 (s, 1H), 2.29 (td,  $J = 7.0, 2.0$  Hz, 1H), 1.61 – 1.48 (m, 1H), 1.47 – 1.24 (m, 2H), 0.90 (t,  $J = 6.8$  Hz, 1H).

**$^{13}\text{C NMR}$**  (75 MHz,  $\text{CD}_2\text{Cl}_2$ )  $\delta$ : 149.82, 138.69, 135.73, 129.32, 127.49, 89.99, 89.55, 77.41, 71.27, 31.54, 28.75, 22.81, 21.13, 18.94, 14.07.

**FTIR** (neat): 3116, 3028, 2956, 2930, 2859, 2237, 2200, 1727, 1637, 1612, 1513, 1457, 1378, 1270, 1177, 1140, 1109, 1019.

**HRMS (EI+)** Calcd. For  $C_{18}H_{24}O$  ( $M^+$ ): 256.18272, Found: 256.18139.

### Vinyl Ether 3

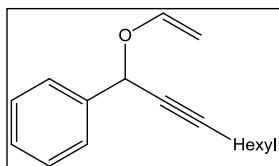

**$^1H$  NMR** (300 MHz,  $CD_2Cl_2$ )  $\delta$ : 7.67 – 7.53 (m, 2H), 7.50 – 7.36 (m, 3H), 6.59 (dd,  $J = 14.1, 6.6$  Hz, 1H), 5.58 (s, 1H), 4.55 (dd,  $J = 14.1, 1.7$  Hz, 1H), 4.23 (dd,  $J = 6.6, 1.8$  Hz, 1H), 2.36 (td,  $J = 7.0, 2.0$  Hz, 2H), 1.72 – 1.56 (m, 2H), 1.56 – 1.31 (m, 6H), 0.98 (t,  $J = 6.7$  Hz, 3H).

**$^{13}C$  NMR** (75 MHz,  $CD_2Cl_2$ )  $\delta$ : 149.84, 138.74, 128.70, 127.55, 90.15, 89.79, 77.33, 71.37, 31.58, 28.77, 22.84, 18.98, 14.12.

**FTIR** (neat): 3436, 3033, 3064, 2956, 2931, 2859, 2236, 2202, 1727, 1645, 1598, 1582, 1493, 1451, 1315, 1266, 1175, 1108, 1068, 1024, 1001.

**HRMS (EI+)** Calcd. For  $C_{17}H_{22}O$  ( $M^+$ ): 242.16677, Found: 242.16707.

### Vinyl Ether 4

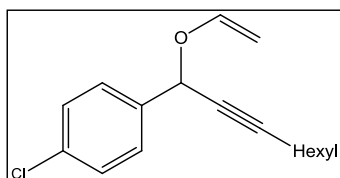

**$^1H$  NMR** (300 MHz,  $CD_2Cl_2$ )  $\delta$ : 7.42 (dd,  $J = 30.4, 8.5$  Hz, 2H), 6.50 (dd,  $J = 14.1, 6.6$  Hz, 2H), 5.50 (s, 1H), 4.47 (dd,  $J = 14.1, 1.8$  Hz, 1H), 4.17 (dd,  $J = 6.6, 1.8$  Hz, 1H), 2.29 (td,  $J = 7.0, 1.9$  Hz, 2H), 1.54 (m, 2H), 1.47 – 1.24 (m, 6H), 0.90 (t,  $J = 6.8$  Hz, 3H).

**$^{13}C$  NMR** (75 MHz,  $CD_2Cl_2$ )  $\delta$ : 149.60, 137.33, 134.40, 128.94, 128.78, 90.39, 90.20, 76.78, 70.51, 31.49, 28.71, 28.64, 22.77, 18.89, 14.03.

**FTIR** (neat): 3115, 3030, 2956, 2930, 2858, 2237, 2201, 1727, 1638, 1617, 1595, 1490, 1466, 1402, 1267, 1171, 1139, 1091, 1015.

**HRMS (EI+)** Calcd. For  $C_{17}H_{21}OCl$  ( $M^+$ ): 276.12810 Found: 276.12679.

### Vinyl Ether 5

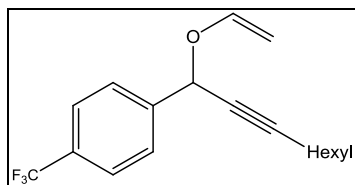

**$^1H$  NMR** (300 MHz,  $CD_2Cl_2$ )  $\delta$ : 7.67 (s, 4H), 6.53 (dd,  $J = 14.2, 6.6$  Hz, 1H), 5.59 (s, 1H), 4.49 (dd,  $J = 14.2, 2.0$  Hz, 1H), 4.20 (dd,  $J = 6.6, 2.0$  Hz, 1H), 2.29 (td,  $J = 7.04, 1.98$  Hz, 2H), 1.61-1.22 (m, 8H), 0.89 (t,  $J = 6.8$  Hz, 3H).

**$^{13}C$  NMR** (75 MHz,  $CD_2Cl_2$ )  $\delta$ : 149.53, 142.73, 130.73, 130.30, 127.75, 126.17, 125.67, 125.62, 125.57, 125.52, 118.96, 100.34, 90.58, 90.53, 76.55, 70.45, 31.47, 28.69, 28.59, 22.74, 18.87, 13.98.

**FTIR** (neat): 3118, 3052, 2959, 2933, 2860, 2283, 2227, 1925, 1638, 1618, 1467, 1417, 1326, 1261, 1167, 1130, 1108, 1067, 1019.

**HRMS (EI+)** Calcd. for  $C_{18}H_{21}OF_3$  ( $M^+$ ): 310.15446, Found: 310.15528.

### Vinyl Ether 6

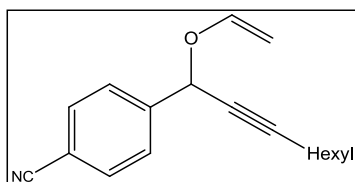

**<sup>1</sup>H NMR** (300 MHz, CD<sub>2</sub>Cl<sub>2</sub>) δ: 7.75 – 7.60 (m, 4H), 6.52 (dd, *J* = 14.1, 6.6 Hz, 1H), 5.57 (s, 1H), 4.49 (dd, *J* = 14.1, 2.0 Hz, 1H), 4.22 (dd, *J* = 6.6, 2.0 Hz, 1H), 2.29 (td, *J* = 7.0, 2.0 Hz, 1H), 1.53 (m, 2H), 1.47 – 1.22 (m, 6H), 0.90 (t, *J* = 6.7 Hz, 1H).

**<sup>13</sup>C NMR** (75 MHz, CD<sub>2</sub>Cl<sub>2</sub>) δ: 149.43, 143.64, 132.54, 127.97, 118.70, 112.46, 90.86, 90.76, 76.18, 70.29, 31.44, 28.68, 28.54, 22.74, 18.86, 14.00.

**FTIR** (neat): 3117, 3059, 2956, 2931, 2859, 2282, 2230, 1926, 1638, 1620, 1504, 1466, 1411, 1328, 1297, 1181, 1138, 1109, 1035, 1020.

**HRMS (EI+)** Calcd. For C<sub>18</sub>H<sub>21</sub>ON (M<sup>+</sup>): 267.16232, Found: 267.16235.

### Vinyl Ether **13**

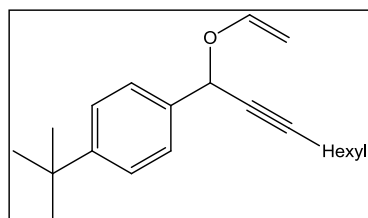

**<sup>1</sup>H NMR** (300 MHz, CD<sub>2</sub>Cl<sub>2</sub>) δ: 7.44 (m, 4H), 6.54 (dd, *J* = 13.8, 6.6 Hz, 2H), 5.50 (m, 1H), 4.48 (dd, *J* = 14.2, 1.7 Hz, 1H), 4.16 (dd, *J* = 6.7, 1.9 Hz, 1H), 2.31 (td, *J* = 6.9, 1.9 Hz, 2H), 1.64-1.51 (m, 2H), 1.50 – 1.29 (m, 15H), 0.93 (t, *J* = 6.9 Hz, 3H).

**<sup>13</sup>C NMR** (75 MHz, CD<sub>2</sub>Cl<sub>2</sub>) δ: 151.89, 149.89, 135.72, 127.29, 125.65, 89.94, 89.54, 77.43, 71.22, 34.73, 31.54, 31.30, 28.76, 22.80, 18.95, 14.07.

**FTIR** (neat): 3031, 2960, 2932, 2861, 2226, 1911, 1636, 1615, 1511, 1464, 1364, 1269, 1179, 1141, 1030.

**HRMS (EI+)** Calcd. For C<sub>21</sub>H<sub>30</sub>O (M<sup>+</sup>): 298.22967 Found: 298.22874.

### General Procedure for Propargyl Claisen Rearrangement:

A solution of  $\text{Ph}_3\text{PAuCl}$  (5mg, 0.01 mmol) was prepared in 10mL methylene chloride. A separate solution of  $\text{AgSbF}_6$  (3.4mg, 0.01 mmol) was prepared in 10mL of methylene chloride. To a solution of vinyl ether **11** (0.2 mmol) in 0.05M methylene chloride was added 0.1mL of a standard solution of  $\text{Ph}_3\text{PAuCl}$  and 0.1mL of  $\text{AgSbF}_6$ . The reaction time was recorded at the moment of addition of  $\text{AgSbF}_6$ . The reaction was allowed to run for exactly five minutes before quenching with 2 mL of methanol and sodium borohydride (10 mg). The reaction mixture was stirred for another 30 minutes before extracting the organic phase with the methylene chloride. The organic phase was dried over anhydrous potassium carbonate. Products were isolated using silica column chromatography. Yields given represent average of three runs.

#### Allene **7**

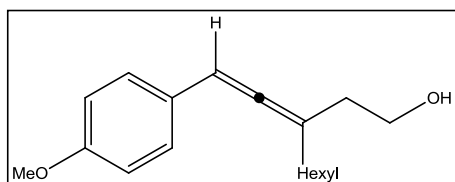

Using the general procedure described above, vinyl ether **1** gave 21% of allene **8** in five minutes.  $^1\text{H NMR}$  (300 MHz,  $\text{CD}_2\text{Cl}_2$ )  $\delta$ : 7.23 (m, 2H), 6.88 (m, 2H), 6.18 (dd,  $J = 5.9, 2.9$  Hz, 1H), 3.80 (s, 3H), 3.75 (t,  $J = 6.1$  Hz, 2H), 2.36 (m, 2H), 2.13 (td,  $J = 7.4, 2.8$  Hz, 2H), 1.90 (s, 1H), 1.51 (m, 2H), 1.45 – 1.23 (m, 6H), 0.90 (t,  $J = 6.7$  Hz, 3H).

$^{13}\text{C NMR}$  (75 MHz,  $\text{CD}_2\text{Cl}_2$ )  $\delta$ : 201.39, 158.90, 128.00, 127.65, 114.26, 105.90, 95.38, 61.00, 55.43, 36.26, 33.27, 31.93, 29.30, 27.82, 22.88, 14.12.

**FTIR** (neat): 3383, 3064, 3001, 2955, 2928, 2856, 2872, 1946, 1735, 1608, 1580, 1510, 1465, 1442, 1297, 1248, 1171, 1107, 1036.

**HRMS** (EI+) Calcd. For  $\text{C}_{18}\text{H}_{26}\text{O}_2$  ( $\text{M}^+$ ): 274.19328, Found: 274.19323.

### Allene **8**

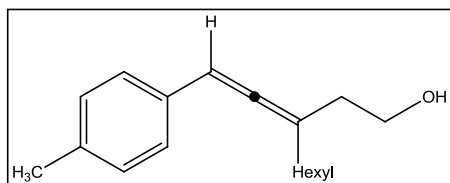

Using the general procedure described above, vinyl ether **2** gave 28% of allene **9** in five minutes.

**<sup>1</sup>H NMR** (300 MHz, CD<sub>2</sub>Cl<sub>2</sub>) δ: 7.39 – 6.96 (m, 5H), 6.20 (m, 1H), 3.75 (t, *J* = 6.4 Hz, 2H), 2.35 (s, 3H), 2.13 (m, 2H), 1.60 – 1.24 (m, 8H), 0.91 (t, *J* = 6.7 Hz, 3H).

**<sup>13</sup>C NMR** (75 MHz, CD<sub>2</sub>Cl<sub>2</sub>) δ: 201.85, 136.70, 132.80, 129.51, 126.53, 105.85, 95.80, 61.01, 36.18, 33.25, 31.98, 29.35, 27.84, 22.93, 21.11, 14.13.

**FTIR** (neat): 3446, 3088, 3019, 2955, 2926, 2856, 2871, 1948, 1513, 1465, 1457, 1377, 1046, 1019.

**HRMS (EI+)** Calcd. For C<sub>18</sub>H<sub>26</sub>O (M<sup>+</sup>): 258.19837, Found: 258.19716.

### Allene **9**

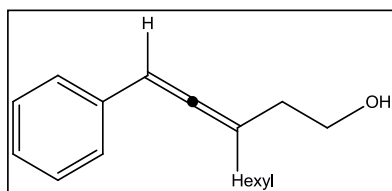

Using the general procedure described above, vinyl ether **4** gave 100% of allene **11** in five minutes.

**<sup>1</sup>H NMR** (300 MHz, CD<sub>2</sub>Cl<sub>2</sub>) δ: 7.39 – 7.11 (m, 5H), 6.30 – 6.12 (m, 1H), 3.75 (t, *J* = 6.3 Hz, 2H), 2.41 – 2.32 (m, 2H), 2.14 (dd, *J* = 10.9, 3.8 Hz, 2H), 1.61 – 1.45 (m, 2H), 1.43 – 1.22 (m, 6H), 0.89 (t, *J* = 6.6 Hz, 1H).



$^{13}\text{C}$  NMR (75 MHz,  $\text{CD}_2\text{Cl}_2$ )  $\delta$ : 202.21, 135.83, 128.77, 126.83, 126.61, 106.04, 95.92, 60.97, 36.16, 33.14, 31.92, 29.29, 27.79, 22.87, 14.06.

**FTIR** (neat): 3333, 3083, 3063, 3031, 2954, 2926, 2871, 2856, 1947, 1598, 1496, 1461, 1377, 1046, 1028.

**HRMS** (EI+) Calcd. For  $\text{C}_{17}\text{H}_{24}\text{O}$  ( $\text{M}^+$ ): 244.18272, Found: 244.18242.

### Allene **10**

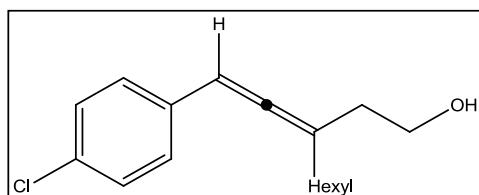

Using the general procedure described above, vinyl ether **5** gave 60% of allene **12** in five minutes.

$^1\text{H}$  NMR (300 MHz,  $\text{CD}_2\text{Cl}_2$ )  $\delta$ : 7.32 – 7.20 (m, 4H), 6.17 (s, 1H), 3.73 (t,  $J = 6.3$  Hz, 2H), 2.35 (ddd,  $J = 10.0, 6.3, 3.7$  Hz, 2H), 2.12 (td,  $J = 7.4, 2.8$  Hz, 2H), 1.63 – 1.20 (m, 8H), 0.87 (t,  $J = 6.6$  Hz, 3H).

$^{13}\text{C}$  NMR (75 MHz,  $\text{CD}_2\text{Cl}_2$ )  $\delta$  202.57, 134.65, 132.21, 128.88, 127.94, 106.41, 95.03, 60.86, 36.02, 33.11, 31.98, 29.36, 27.81, 22.95, 14.17.

**FTIR** (neat): 3345, 3081, 3045, 2955, 2927, 2871, 2856, 1948, 1707, 1490, 1466, 1458, 1387, 1091, 1046, 1013.

**HRMS** (EI+) Calcd. For  $\text{C}_{17}\text{H}_{23}\text{OCl}$  ( $\text{M}^+$ ): 278.14375, Found: 258.14266.

### Allene **11**

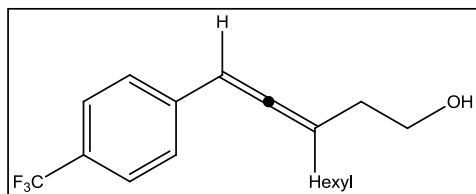

Using the general procedure described above, vinyl ether **6** gave 5% of allene **13** in five minutes.

**<sup>1</sup>H NMR** (300 MHz, CD<sub>2</sub>Cl<sub>2</sub>) δ: 7.54 (d, *J* = 8.2 Hz, 2H), 7.40 (d, *J* = 8.2 Hz, 2H), 6.23 (m, 1H), 3.74 (q, *J* = 6.2 Hz, 2H), 2.36 (ddd, *J* = 9.4, 6.2, 3.1 Hz, 1H), 2.13 (td, *J* = 7.5, 2.9 Hz, 1H), 1.47 (m, 2H), 1.39 – 1.21 (m, 6H), 0.85 (t, *J* = 6.6 Hz, 2H).

**<sup>13</sup>C NMR** (75 MHz, CD<sub>2</sub>Cl<sub>2</sub>) δ: 203.47, 140.08, 128.59, 128.16, 126.79, 126.46, 125.70, 125.65, 125.59, 125.54, 122.86, 106.73, 95.04, 60.82, 35.97, 32.92, 31.88, 29.26, 27.71, 22.84, 14.01.

**FTIR** (neat): 3343, 3069, 3044, 2957, 2929, 2858, 2873, 1948, 1616, 1516, 1467, 1394, 1330, 1231, 1202, 1164, 1126, 1066, 1016.

**HRMS (EI+)** Calcd. For C<sub>18</sub>H<sub>23</sub>OF<sub>3</sub> (M<sup>+</sup>): 312.17011, Found: 312.17023.

### Allene **12**

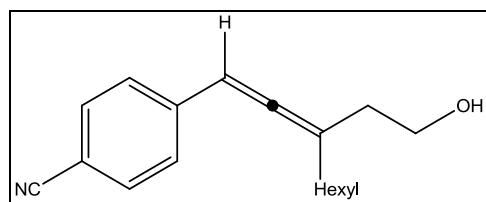

Using the general procedure described above, vinyl ether **7** gave trace of allene **14** in five minutes.

**<sup>1</sup>H NMR** (300 MHz, CD<sub>2</sub>Cl<sub>2</sub>) δ: 7.58 (m, 2H), 7.40 (m, 2H), 6.22 (quin., *J* = 2.7 Hz, 1H), 3.74 (m, 2H), 2.37 (ddd, *J* = 9.3, 6.4, 3.0 Hz, 2H), 2.13 (td, *J* = 7.6, 3.2 Hz, 2H), 1.67 (m, 2H), 1.55 – 1.20 (m, 6H), 0.86 (t, *J* = 6.87 Hz, 3H).

**$^{13}\text{C}$  NMR** (75 MHz,  $\text{CD}_2\text{Cl}_2$ )  $\delta$ : 204, 141.24, 132.57, 127.10, 119.29, 109.87, 107.08, 95.14, 60.76, 35.93, 32.82, 31.84, 29.22, 27.66, 22.82, 14.01.

**FTIR** (neat): 3426, 3063, 3038, 2955, 2928, 2857, 2227, 1964, 1604, 1502, 1458, 1395, 1379, 1340, 1205, 1173, 1107, 1047.

**HRMS** (EI+) Calcd. For  $\text{C}_{18}\text{H}_{23}\text{ON}$  ( $\text{M}^+$ ): 269.17797, Found: 269.17791.

#### Allene **14**

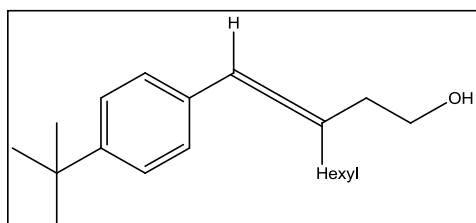

Using the general procedure described above, vinyl ether **3** gave 100% of allene **10** in five minutes.

**$^1\text{H}$  NMR** (300 MHz,  $\text{CD}_2\text{Cl}_2$ )  $\delta$ : 7.27 (m, 4H), 6.19 (m, 1H), 3.62 (q,  $J = 6.3$  Hz, 2H), 2.17 (m, 2H), 1.97 (m, 2H), 1.53 – 1.40 (m, 2H), 1.39-1.11(m, 15H), 0.83 (t,  $J = 6.9$  Hz, 3H).

**$^{13}\text{C}$  NMR** (75 MHz,  $\text{CD}_2\text{Cl}_2$ )  $\delta$ : 201.98, 150.04, 132.76, 126.30, 125.77, 105.86, 95.68, 60.99, 36.23, 34.61, 33.22, 31.95, 31.29, 29.32, 27.82, 22.89, 14.08.

**FTIR** (neat): 3346, 3054, 3025, 2958, 2927, 2858, 1947, 1514, 1463, 1393, 1379, 1362, 1269, 1201, 1108, 1047, 1018.

**HRMS** (EI+) Calcd. For  $\text{C}_{21}\text{H}_{32}\text{O}$  ( $\text{M}^+$ ): 300.24532, Found: 300.24586.

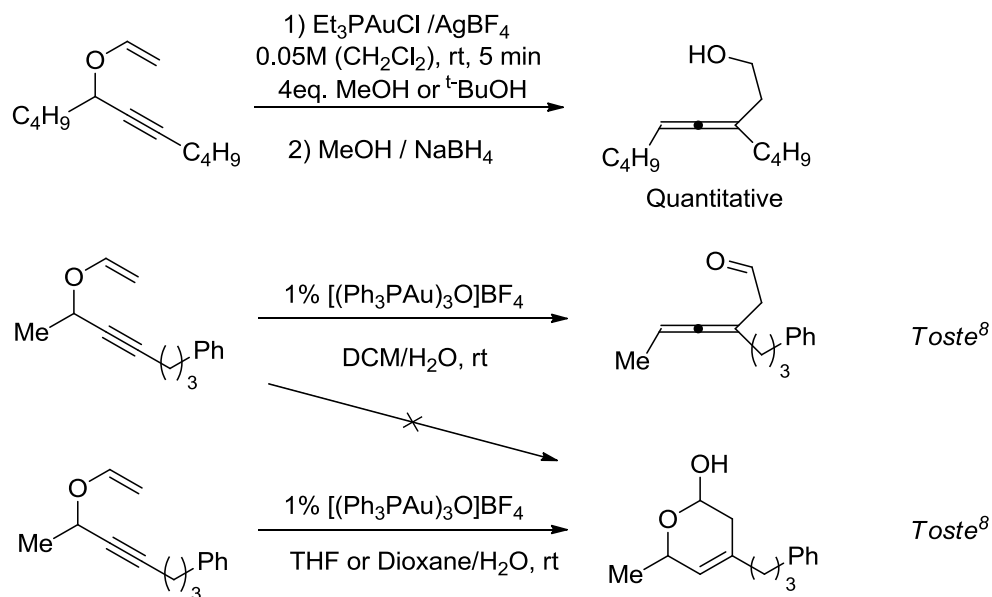

**Scheme 1** The intermediacy of the six-membered intermediate in Au-catalyzed propargyl Claisen rearrangements depends on the reaction conditions.

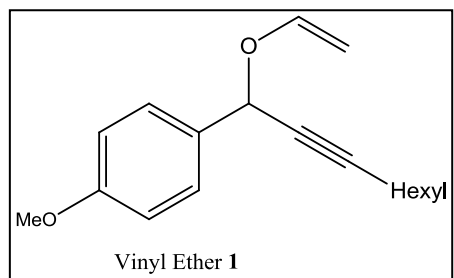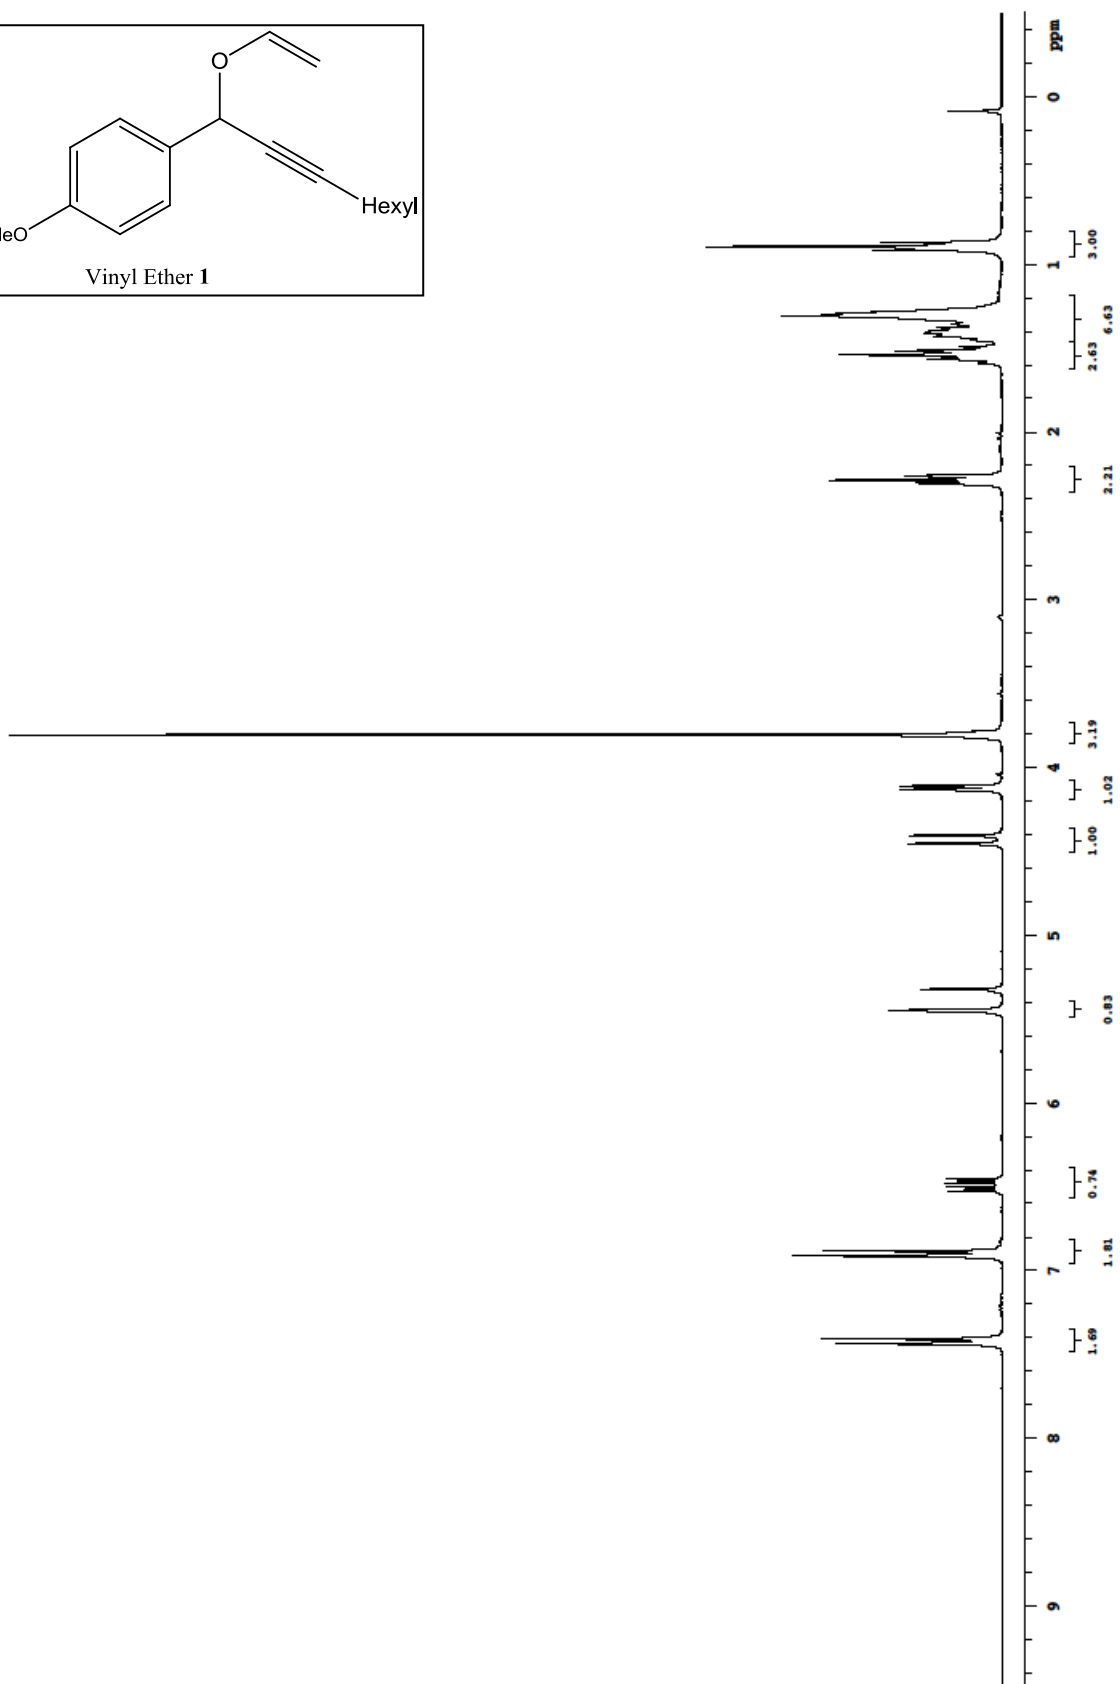

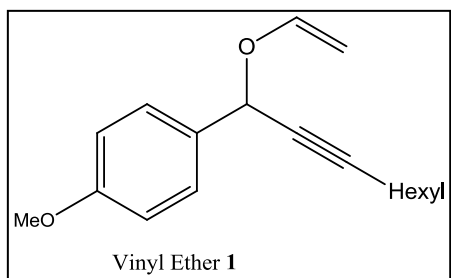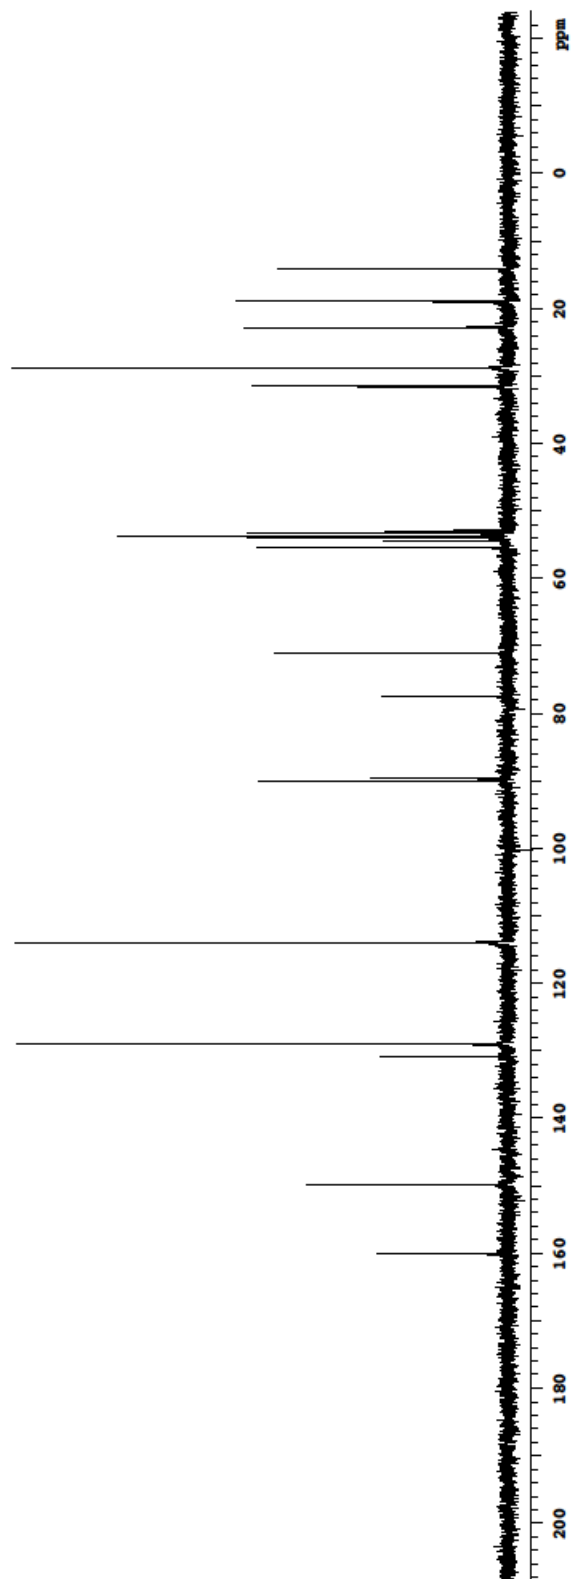

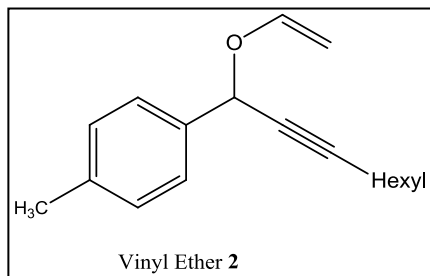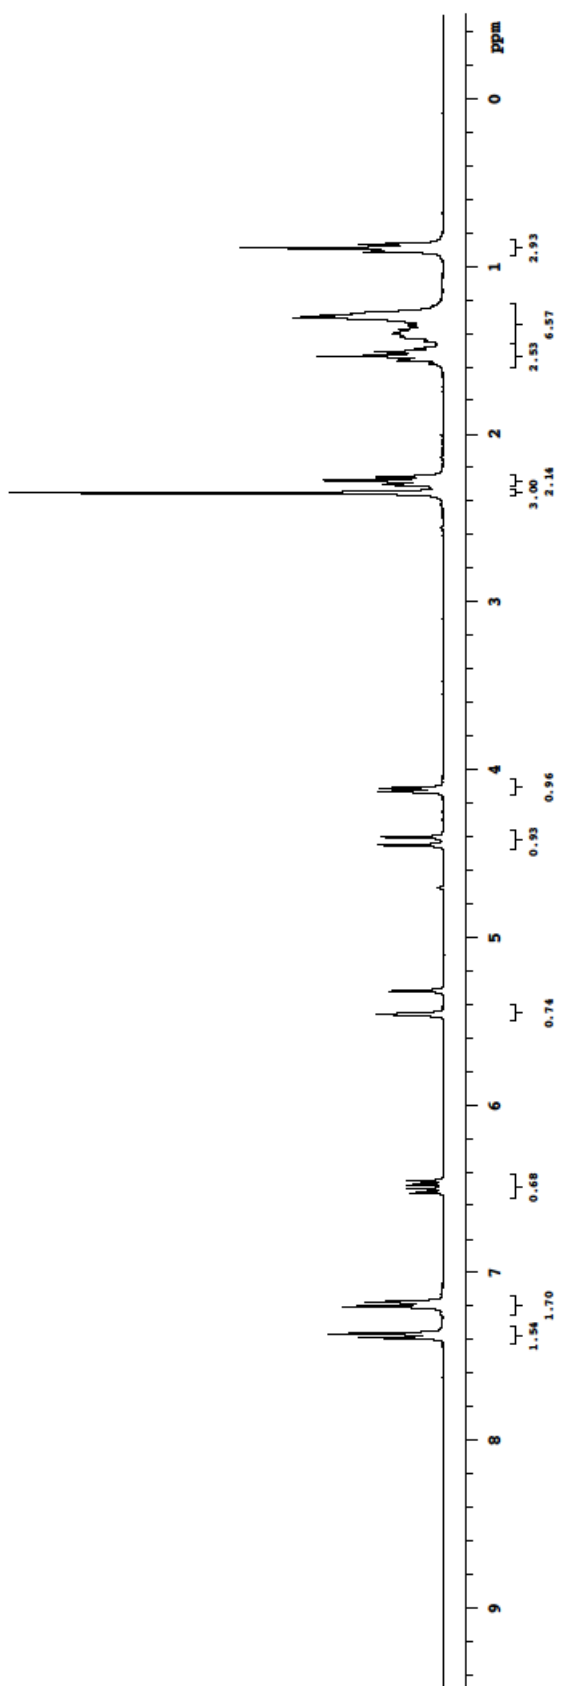

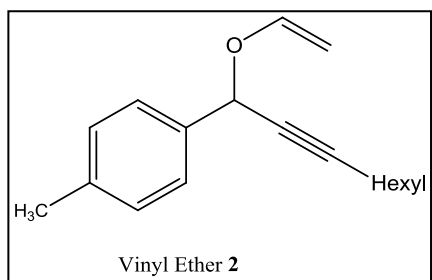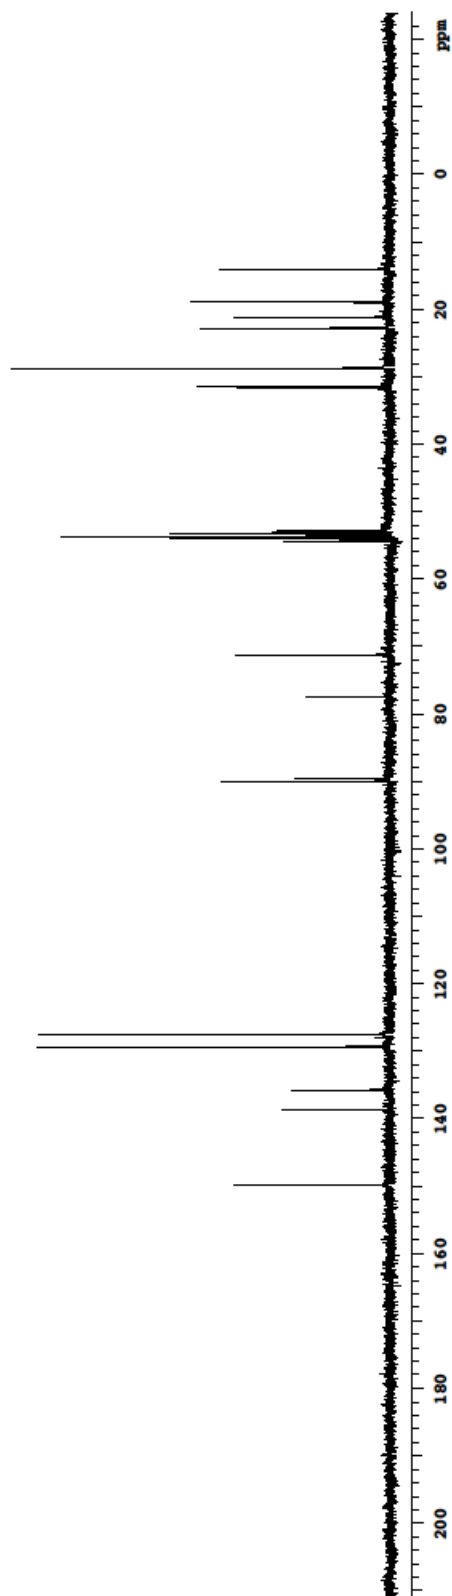



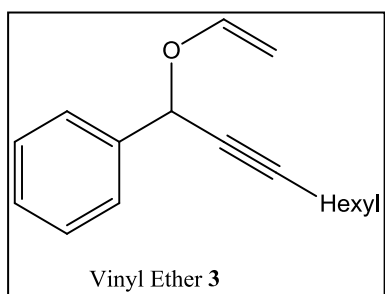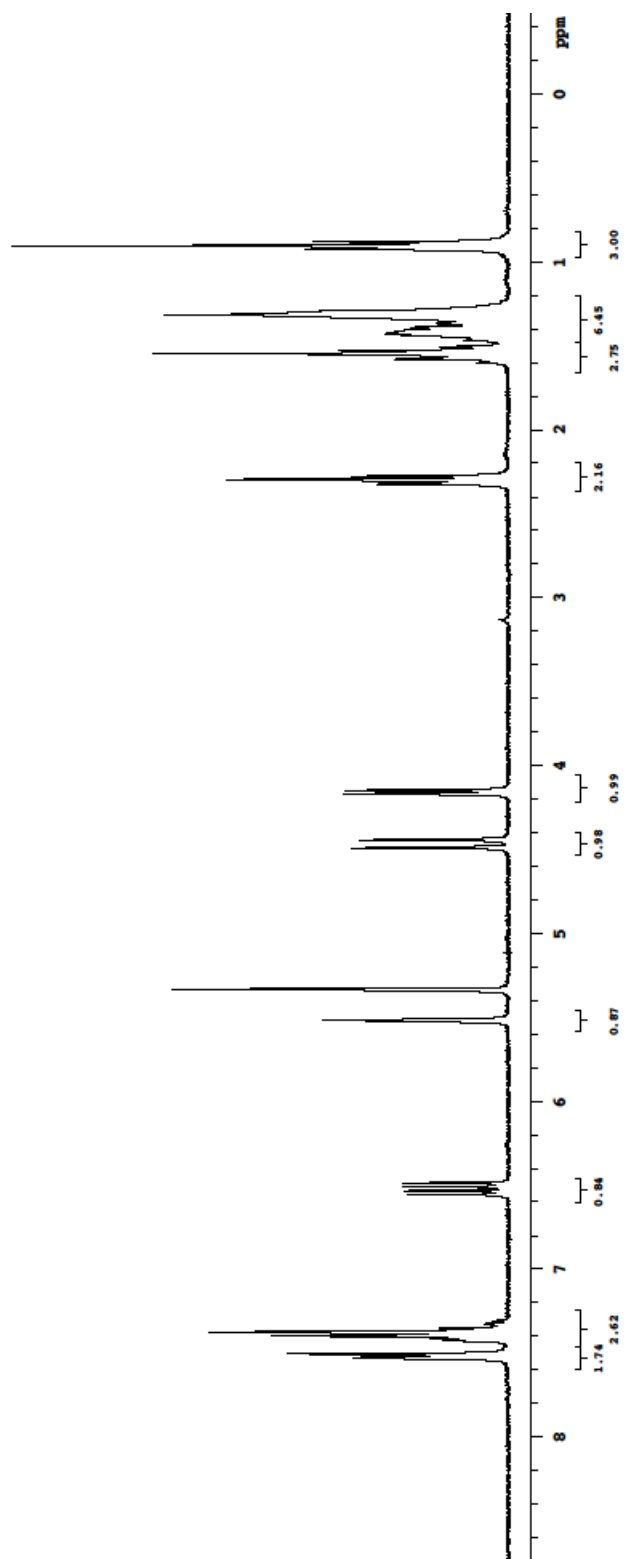

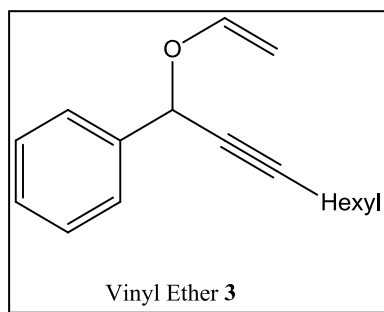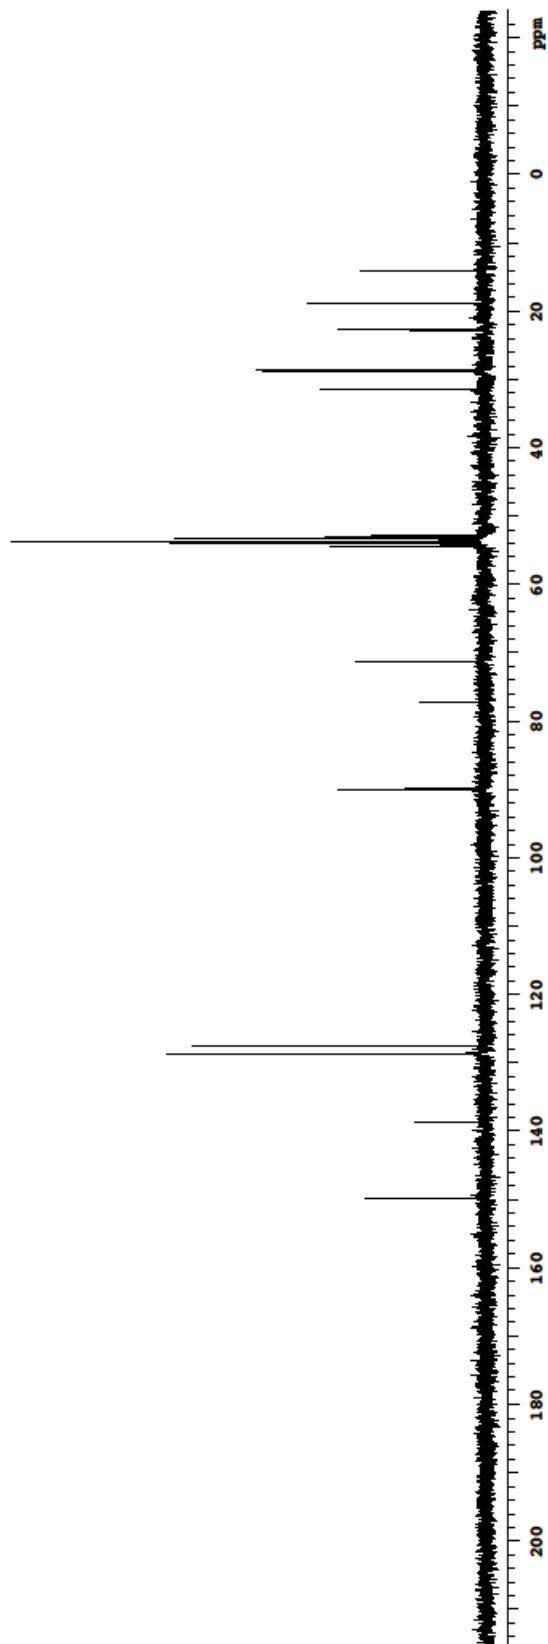

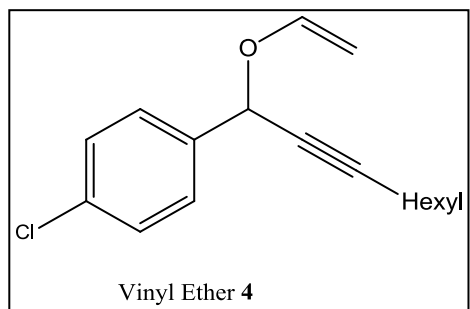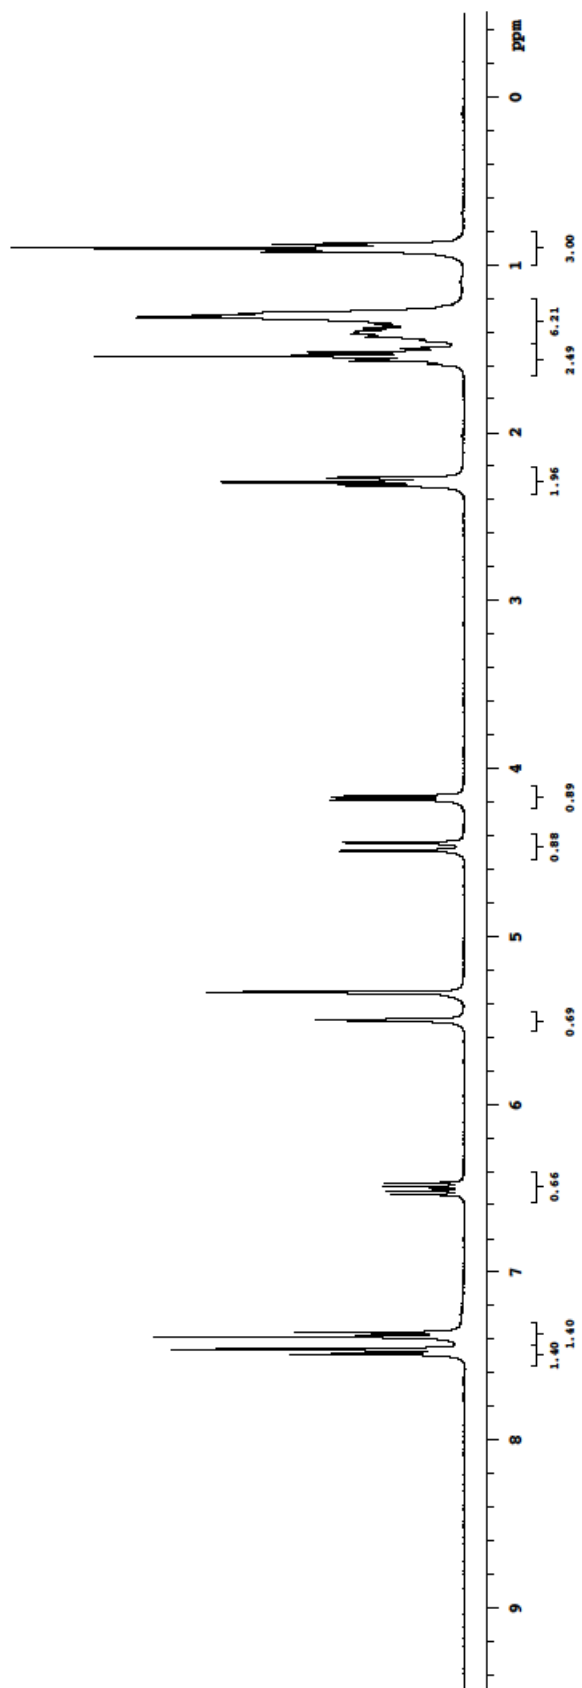

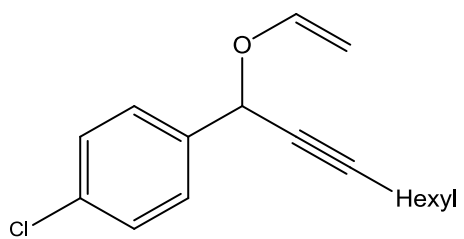

Vinyl Ether 4

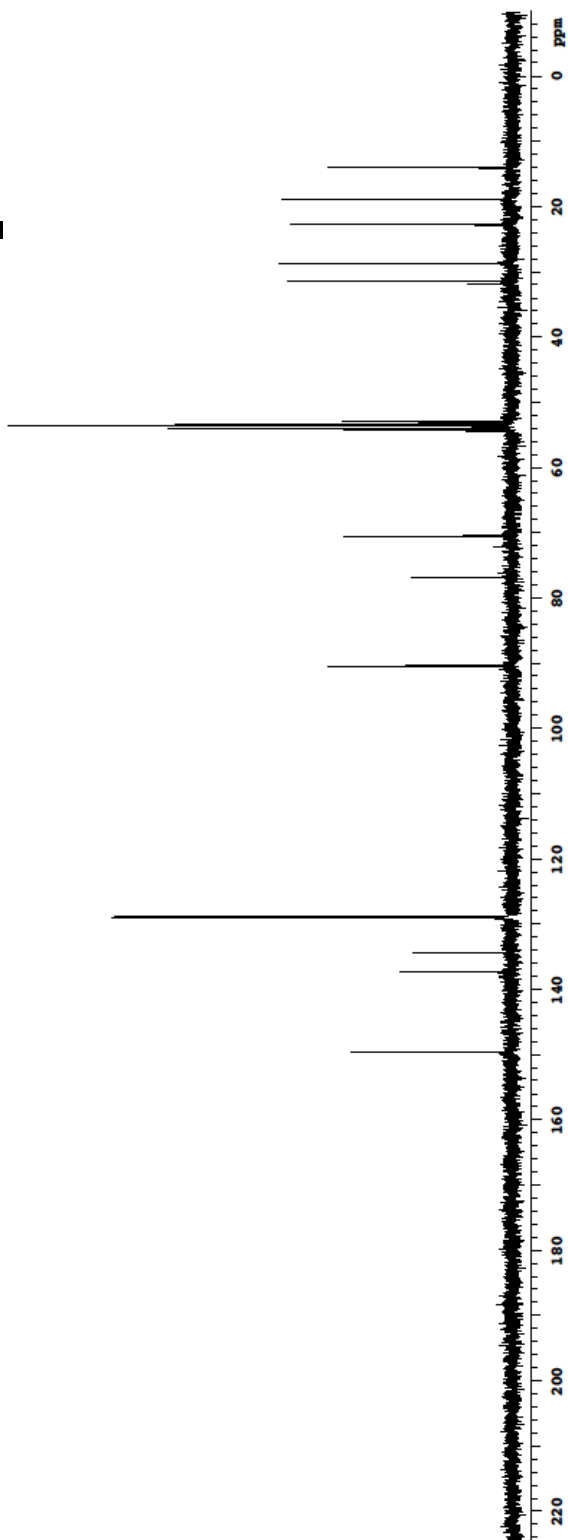

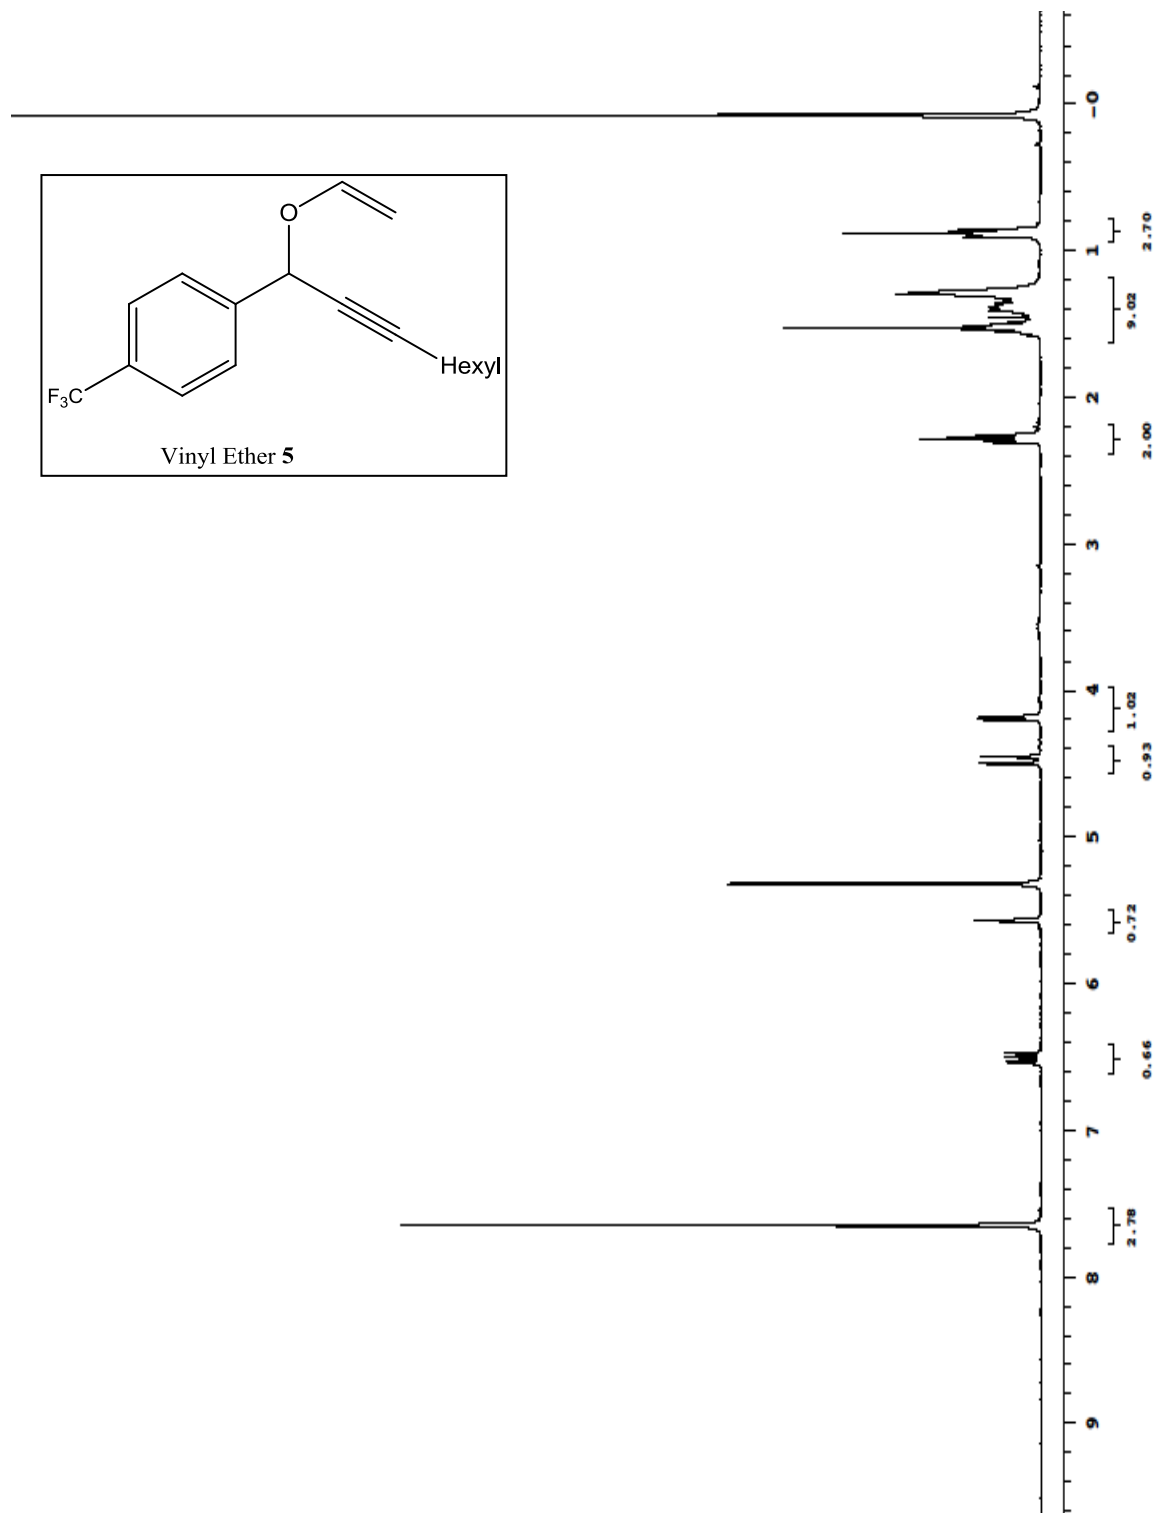

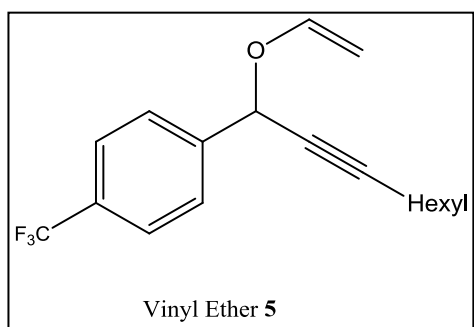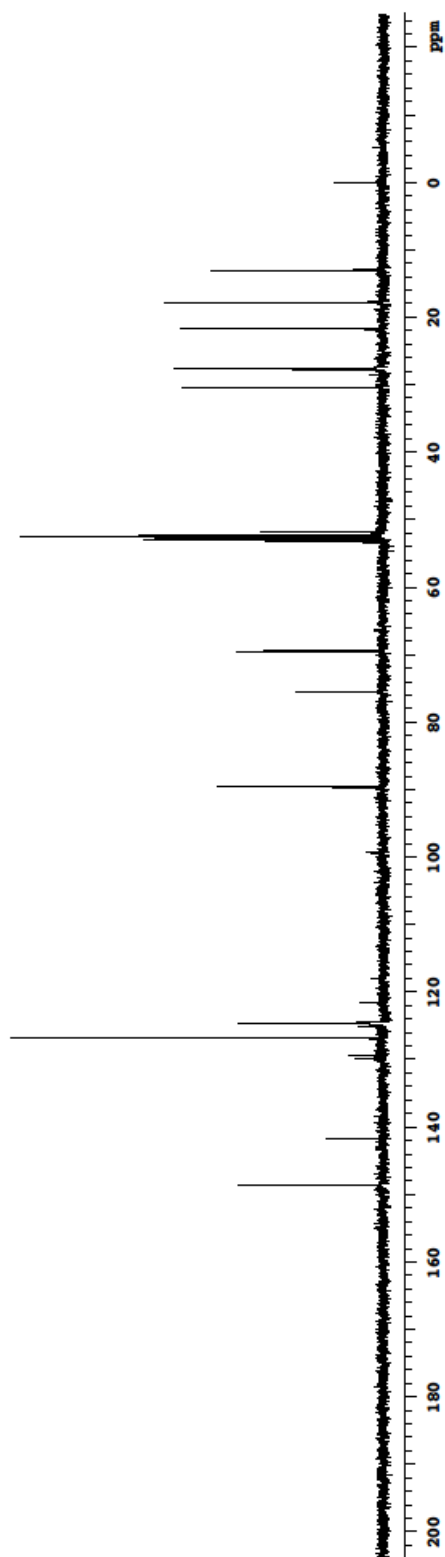

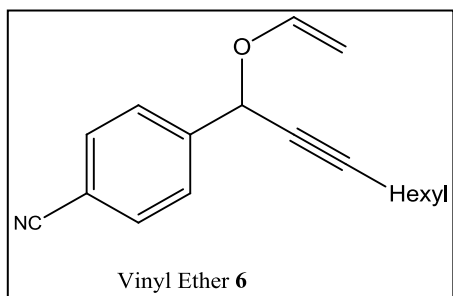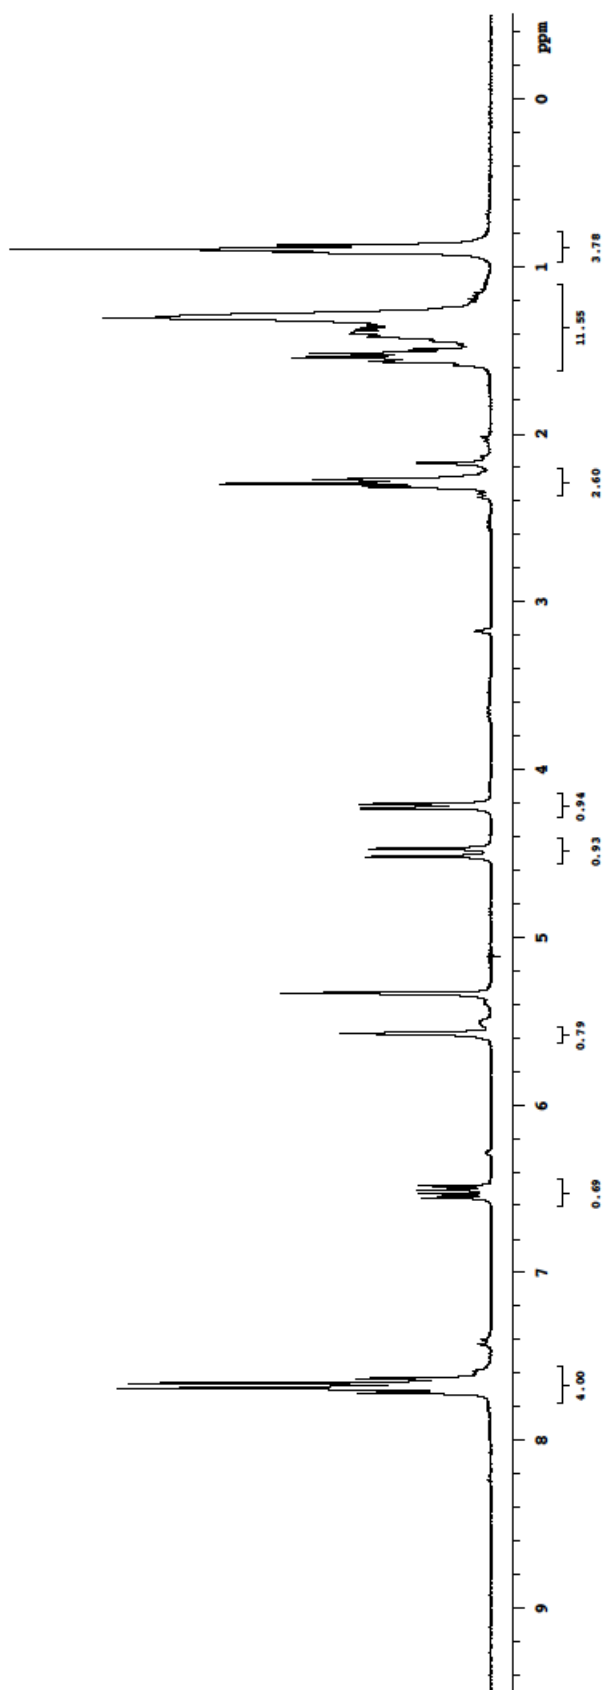

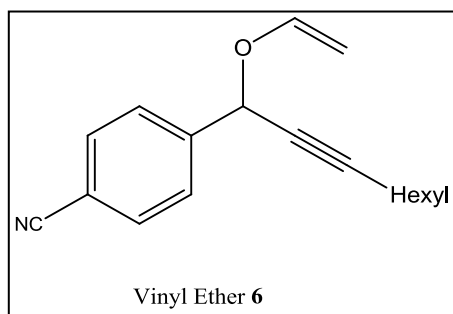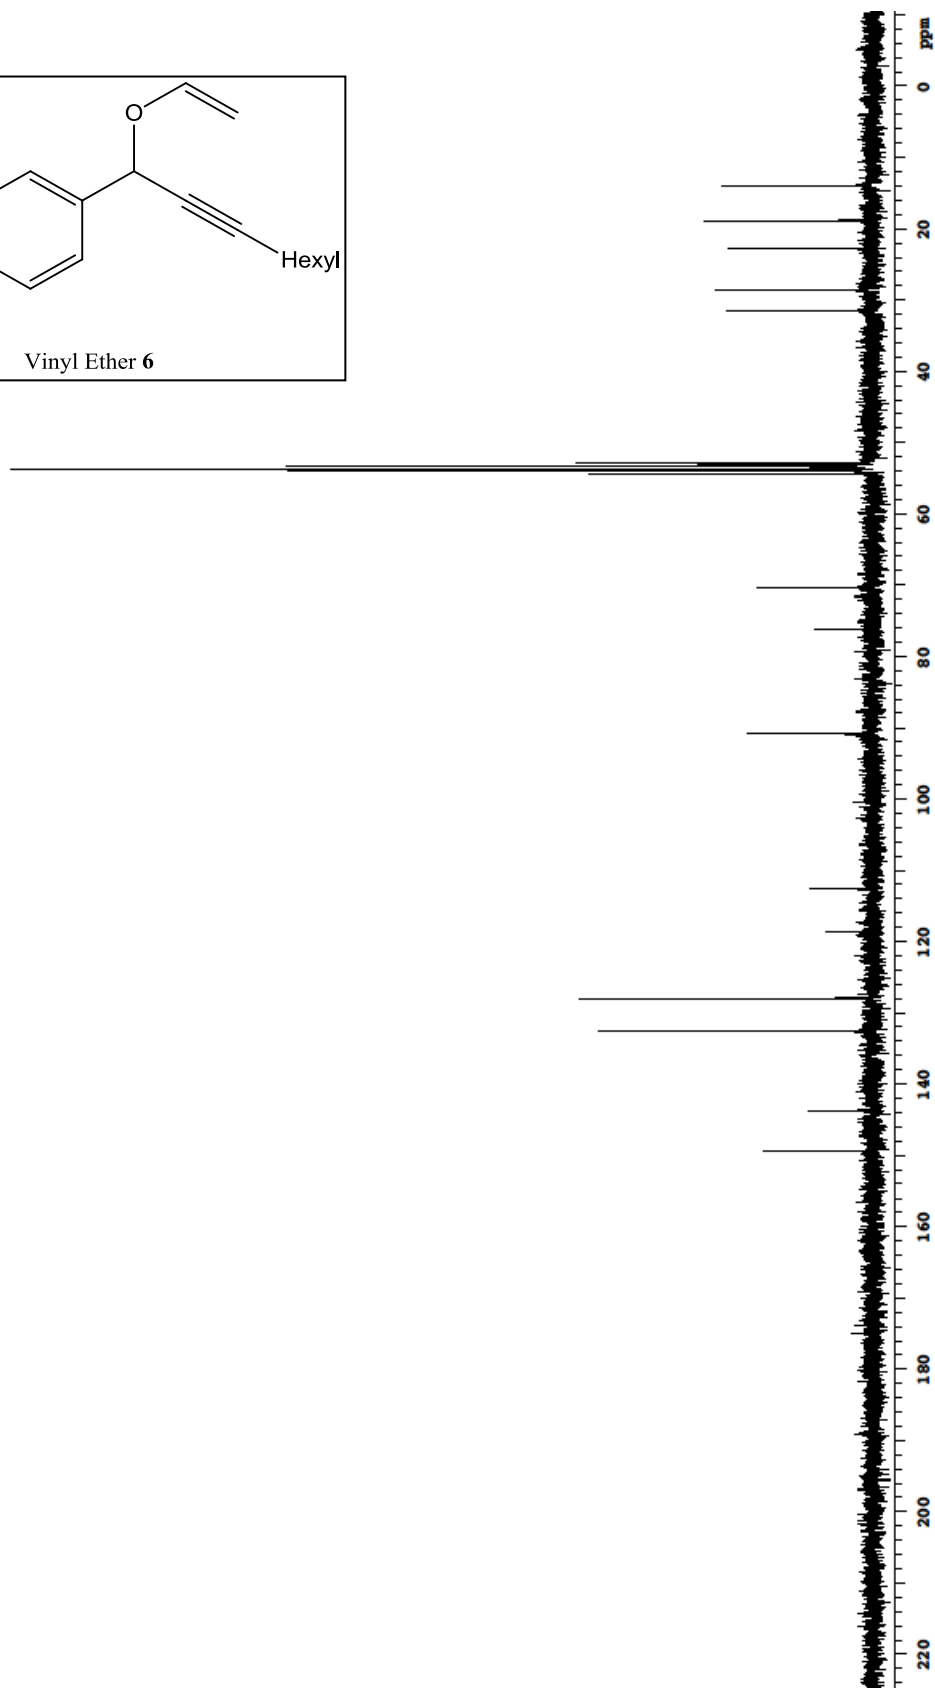



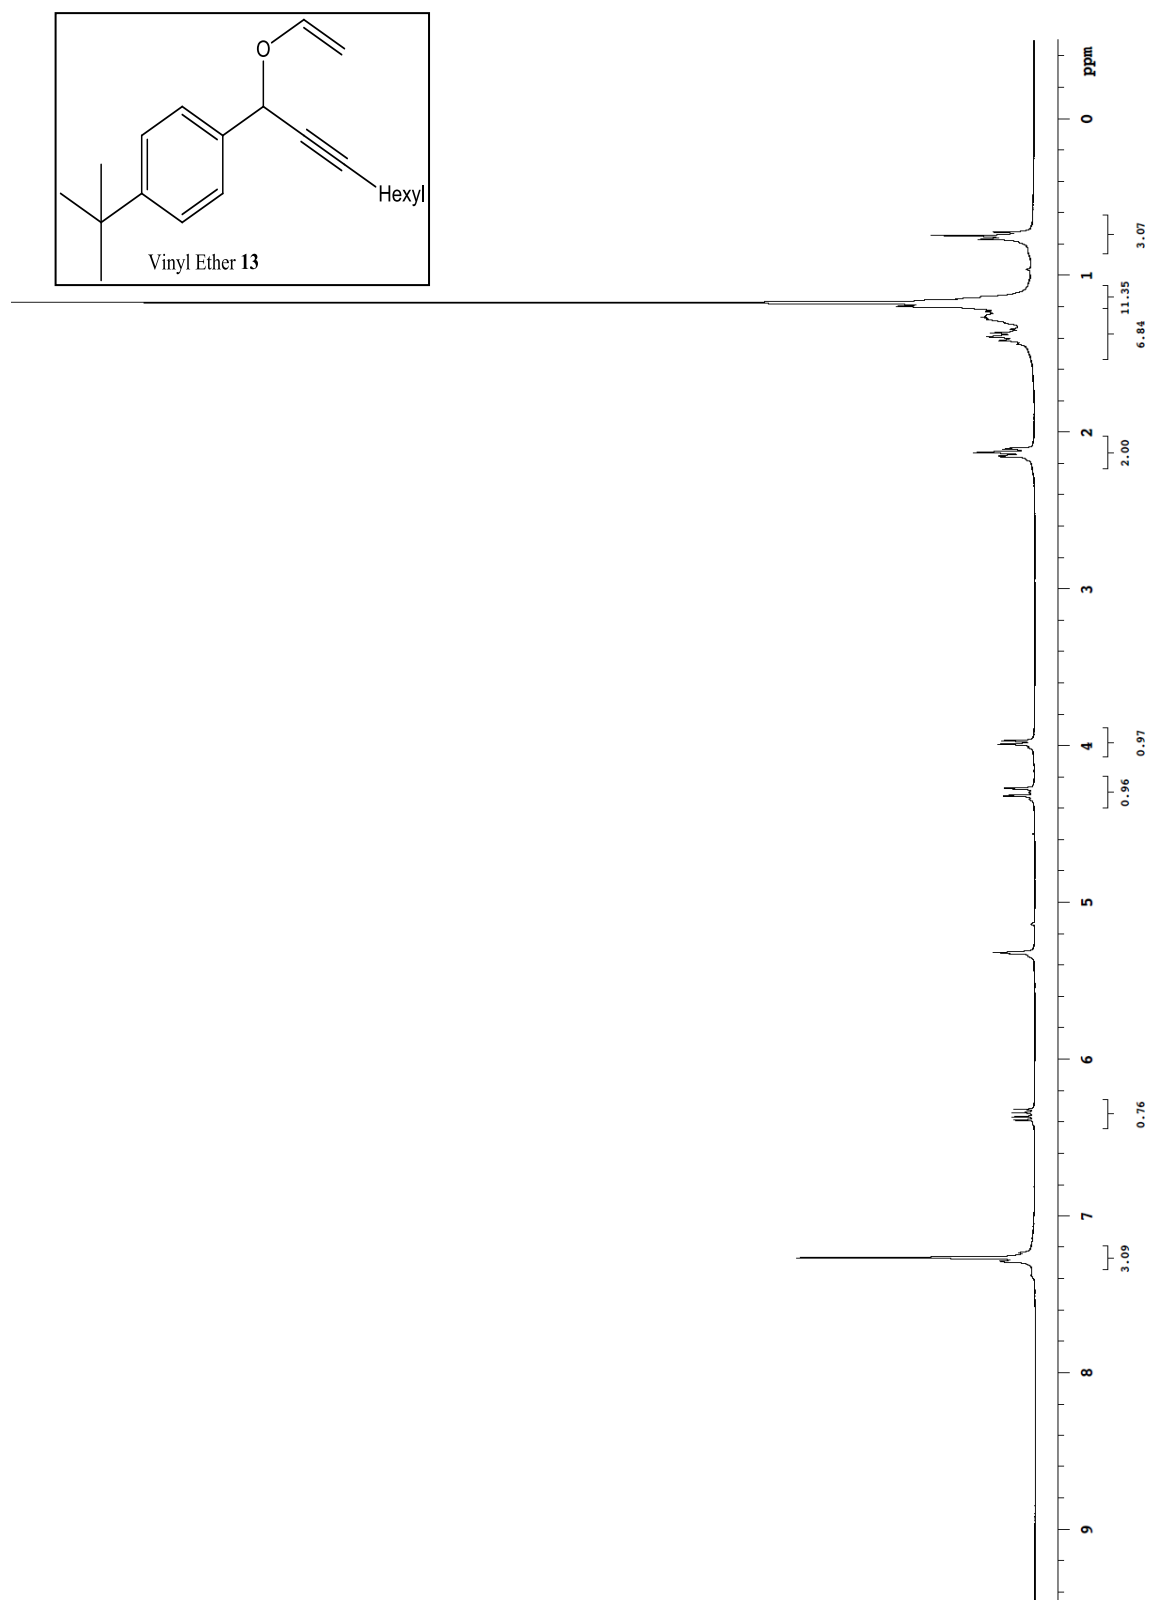

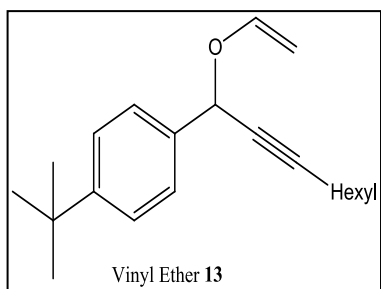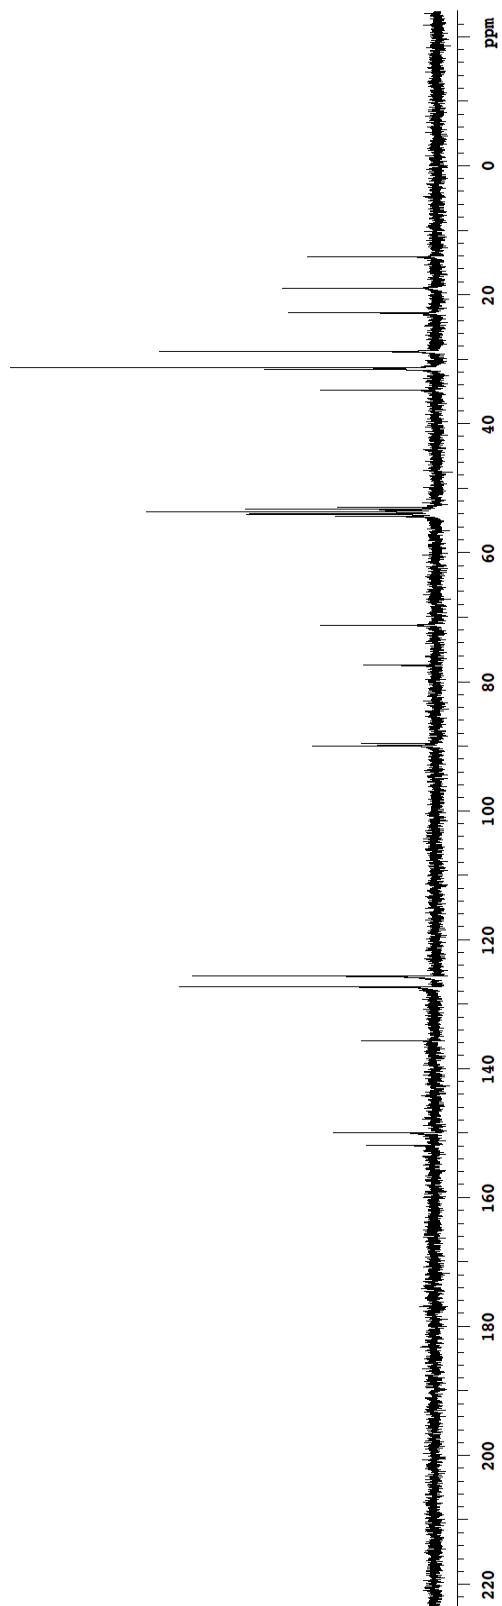

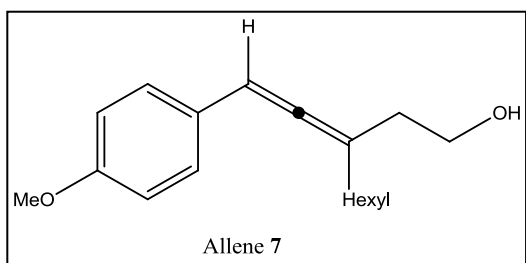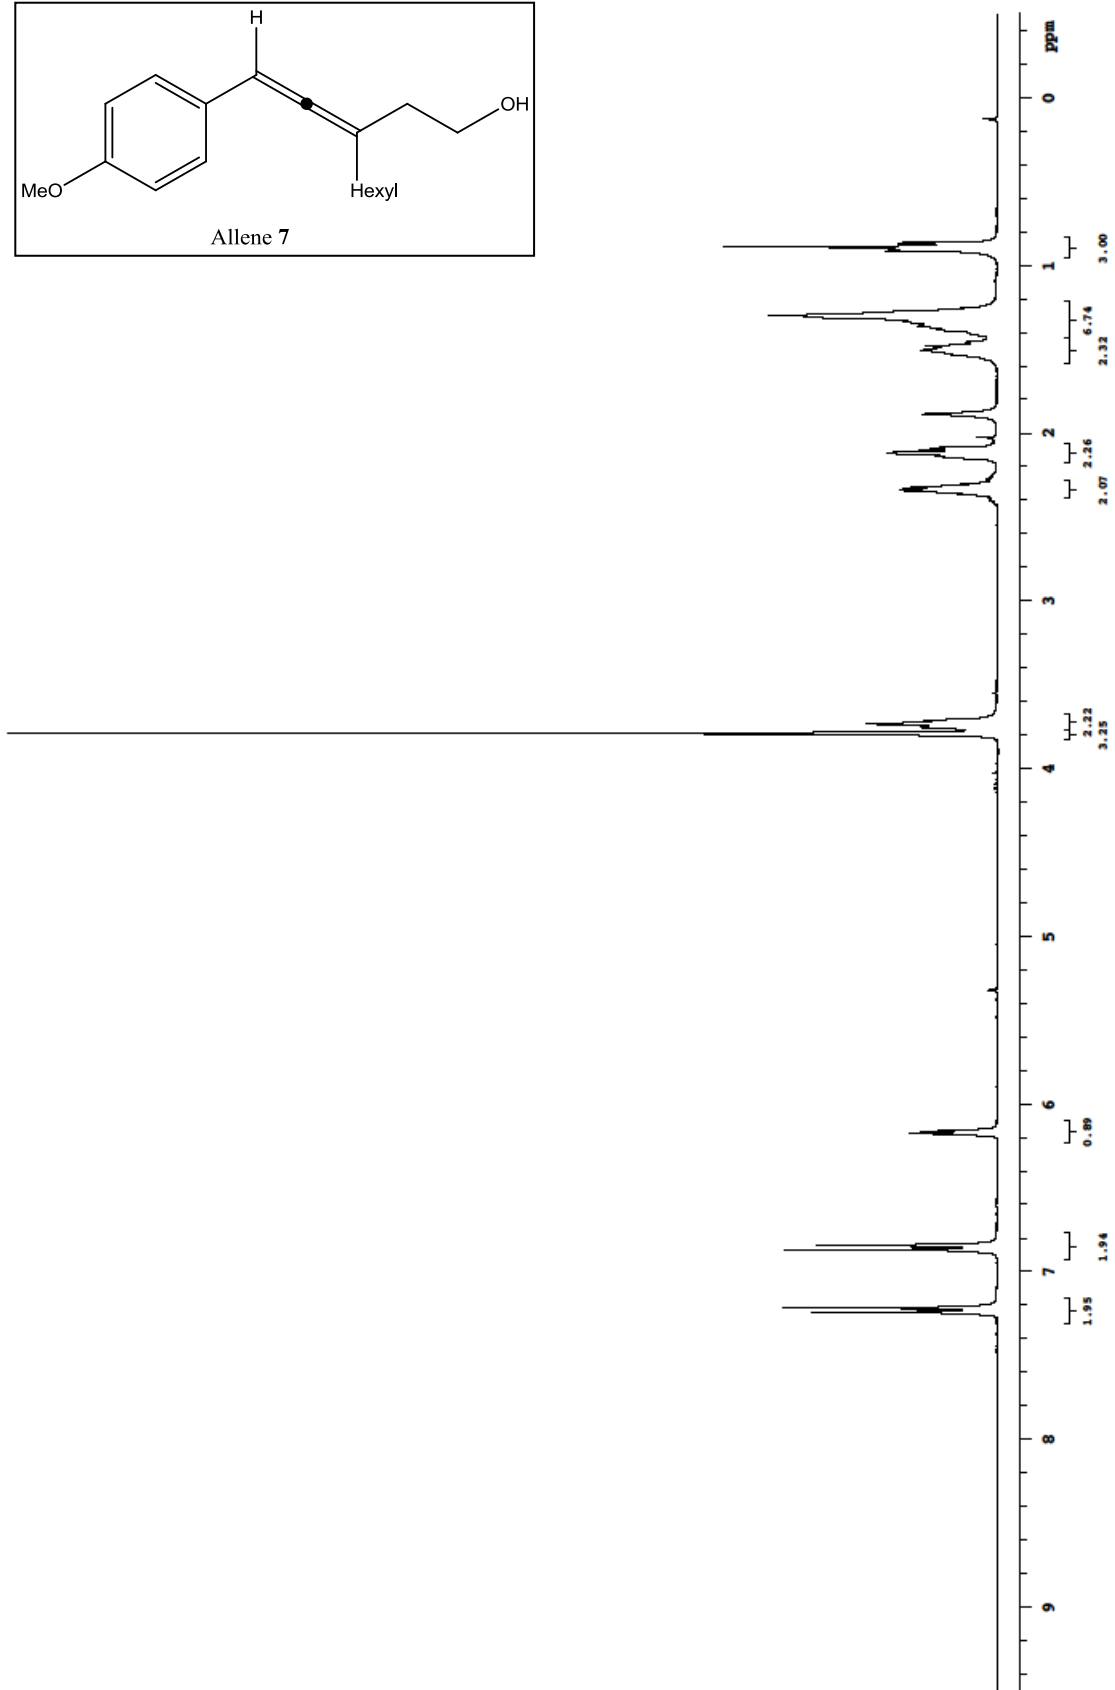

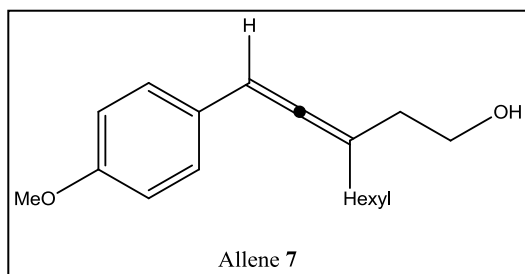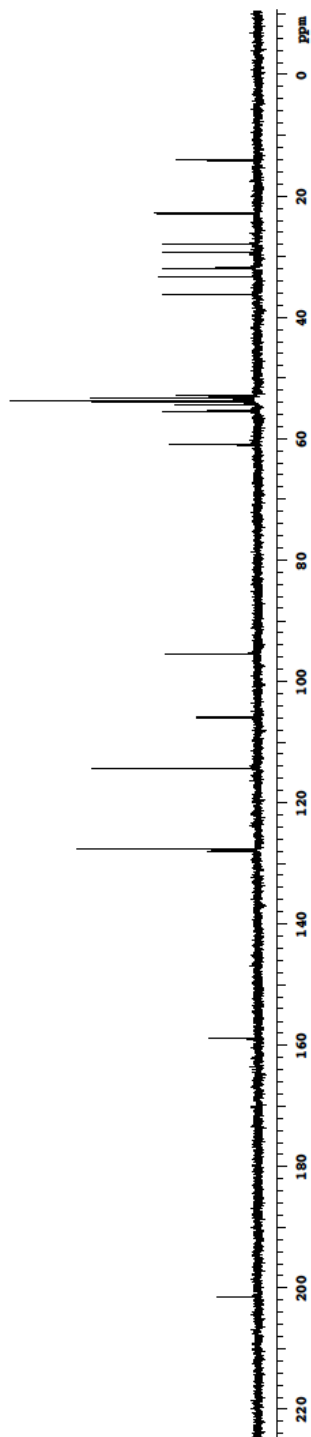

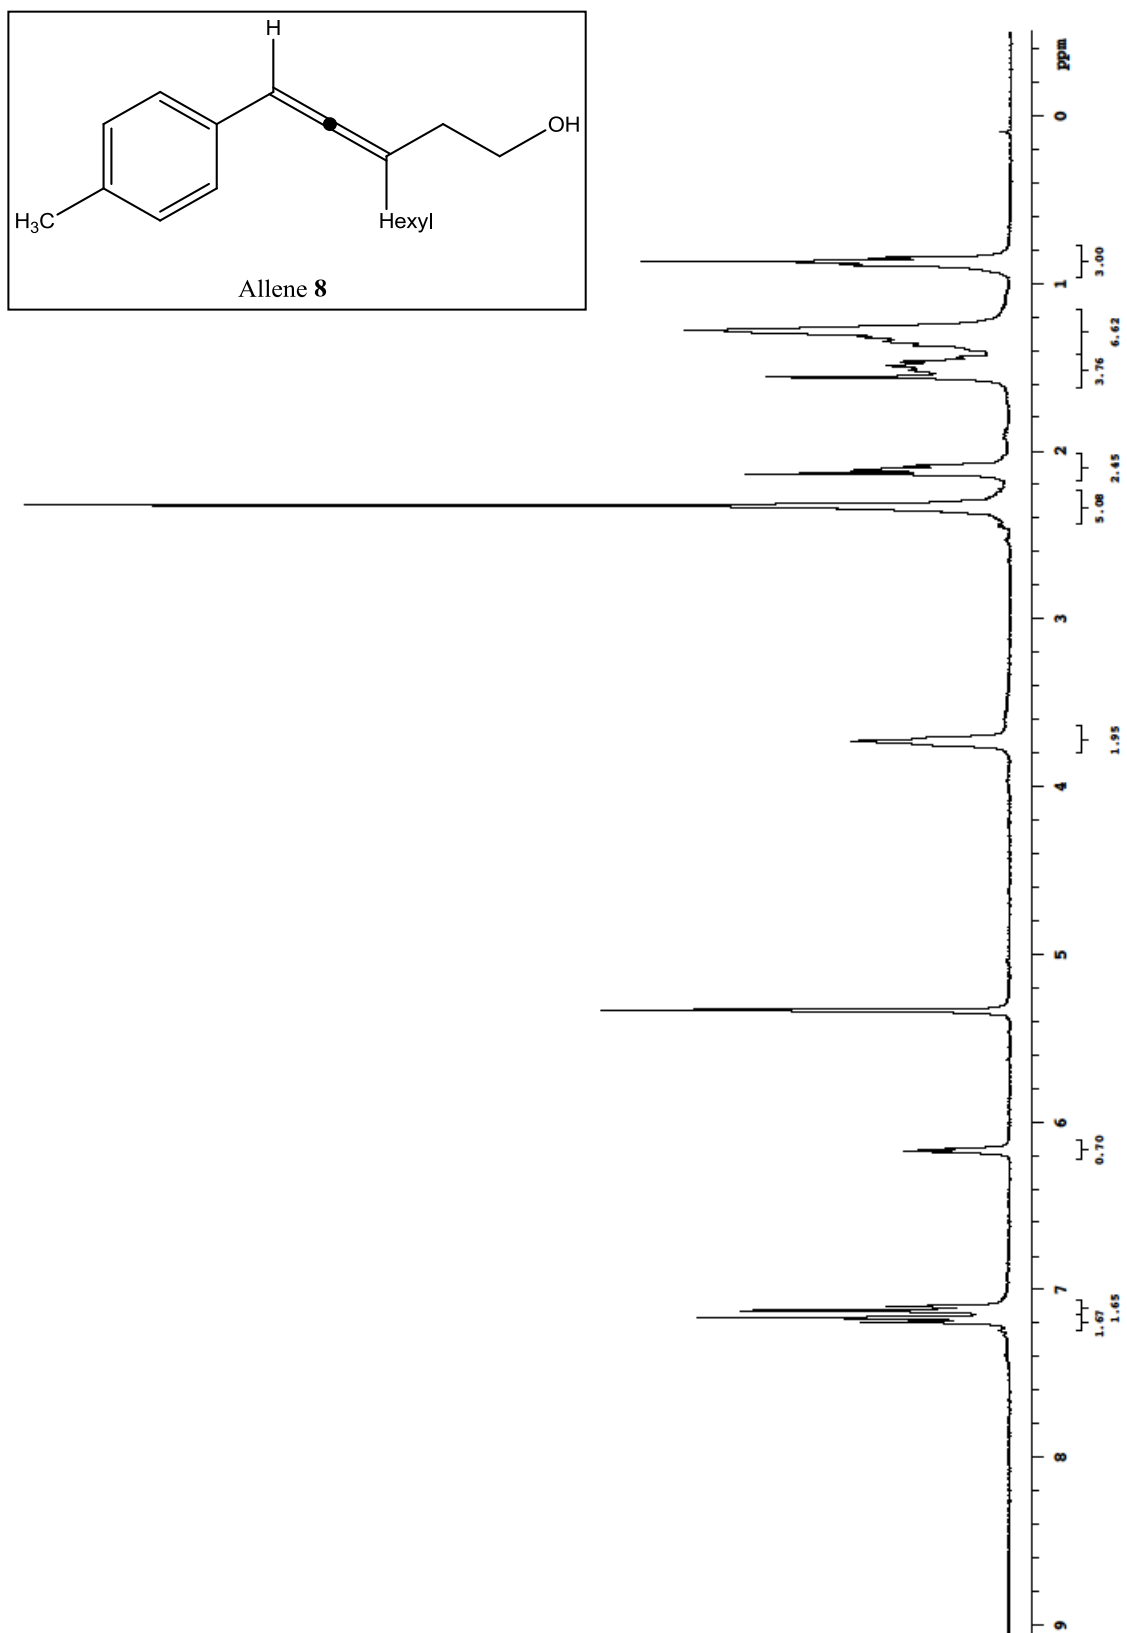

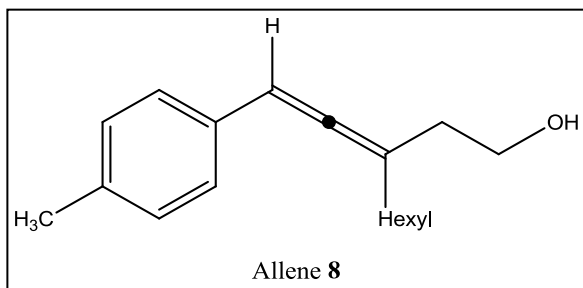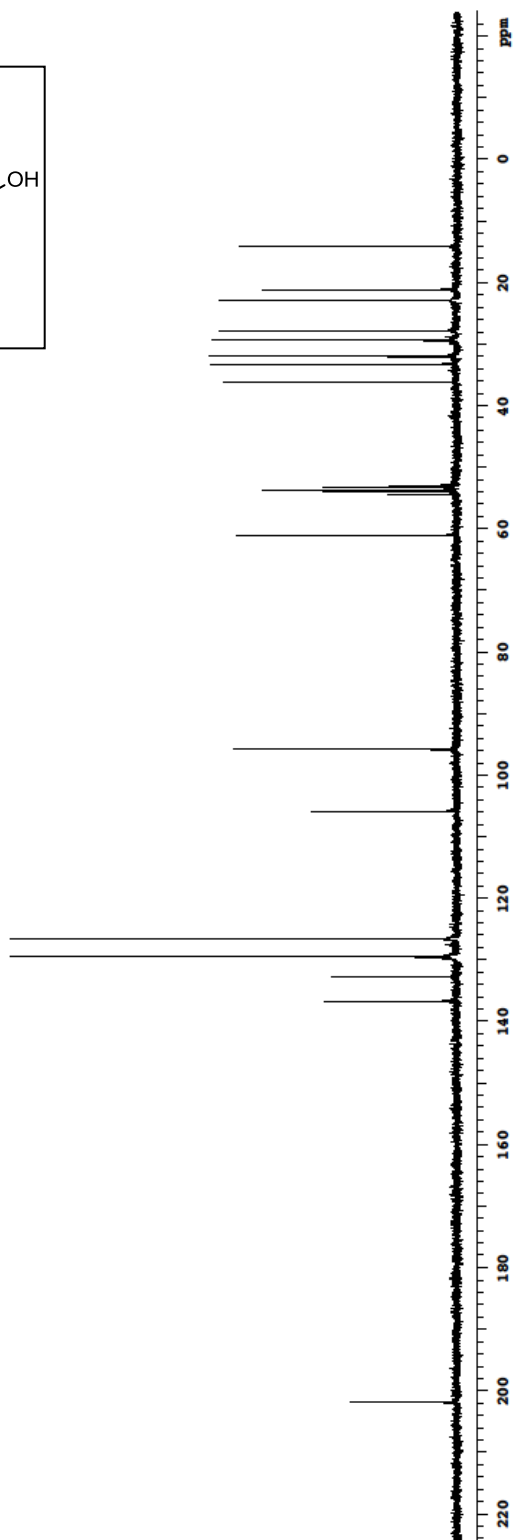

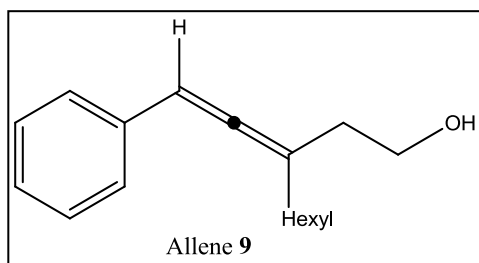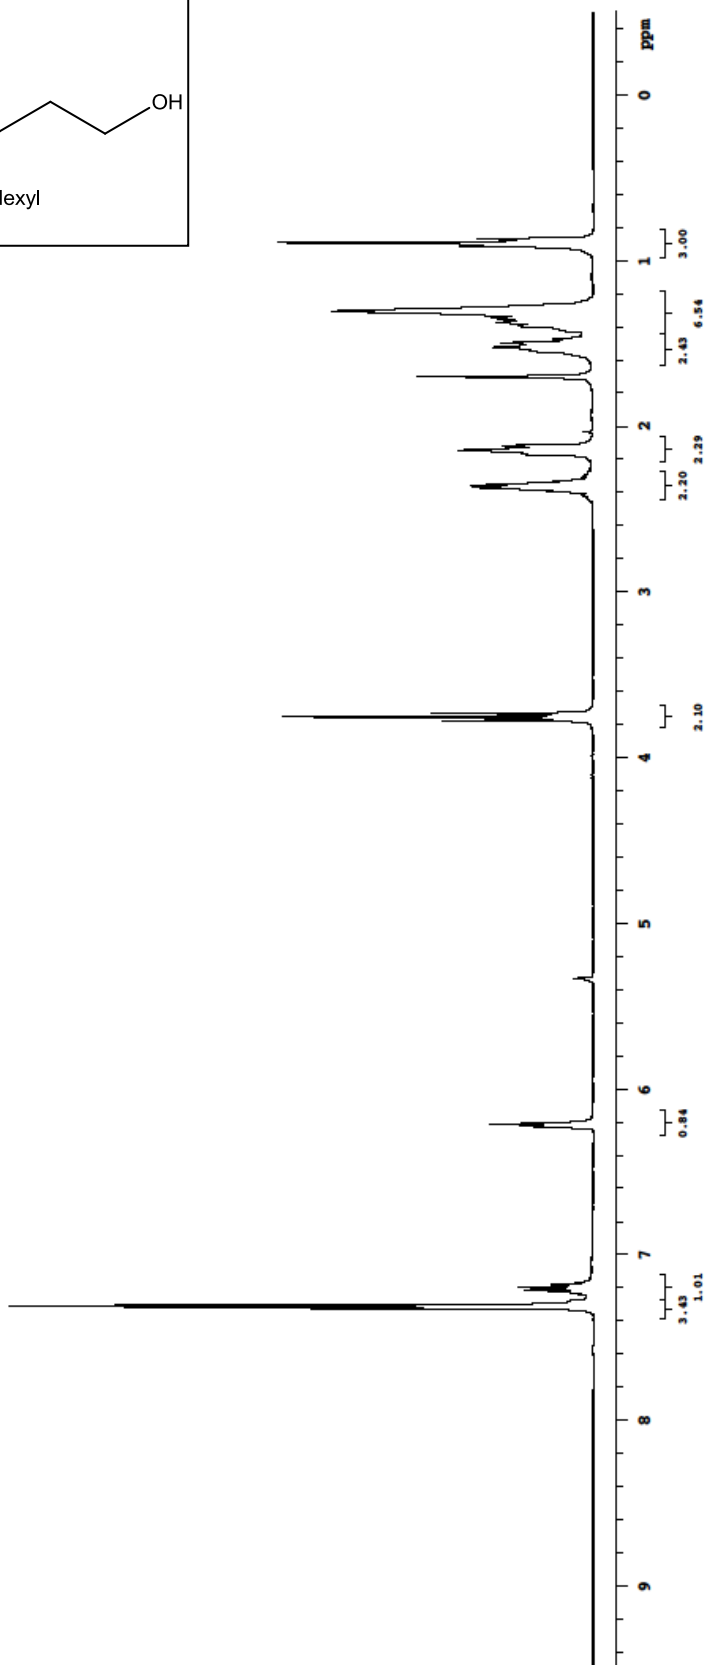

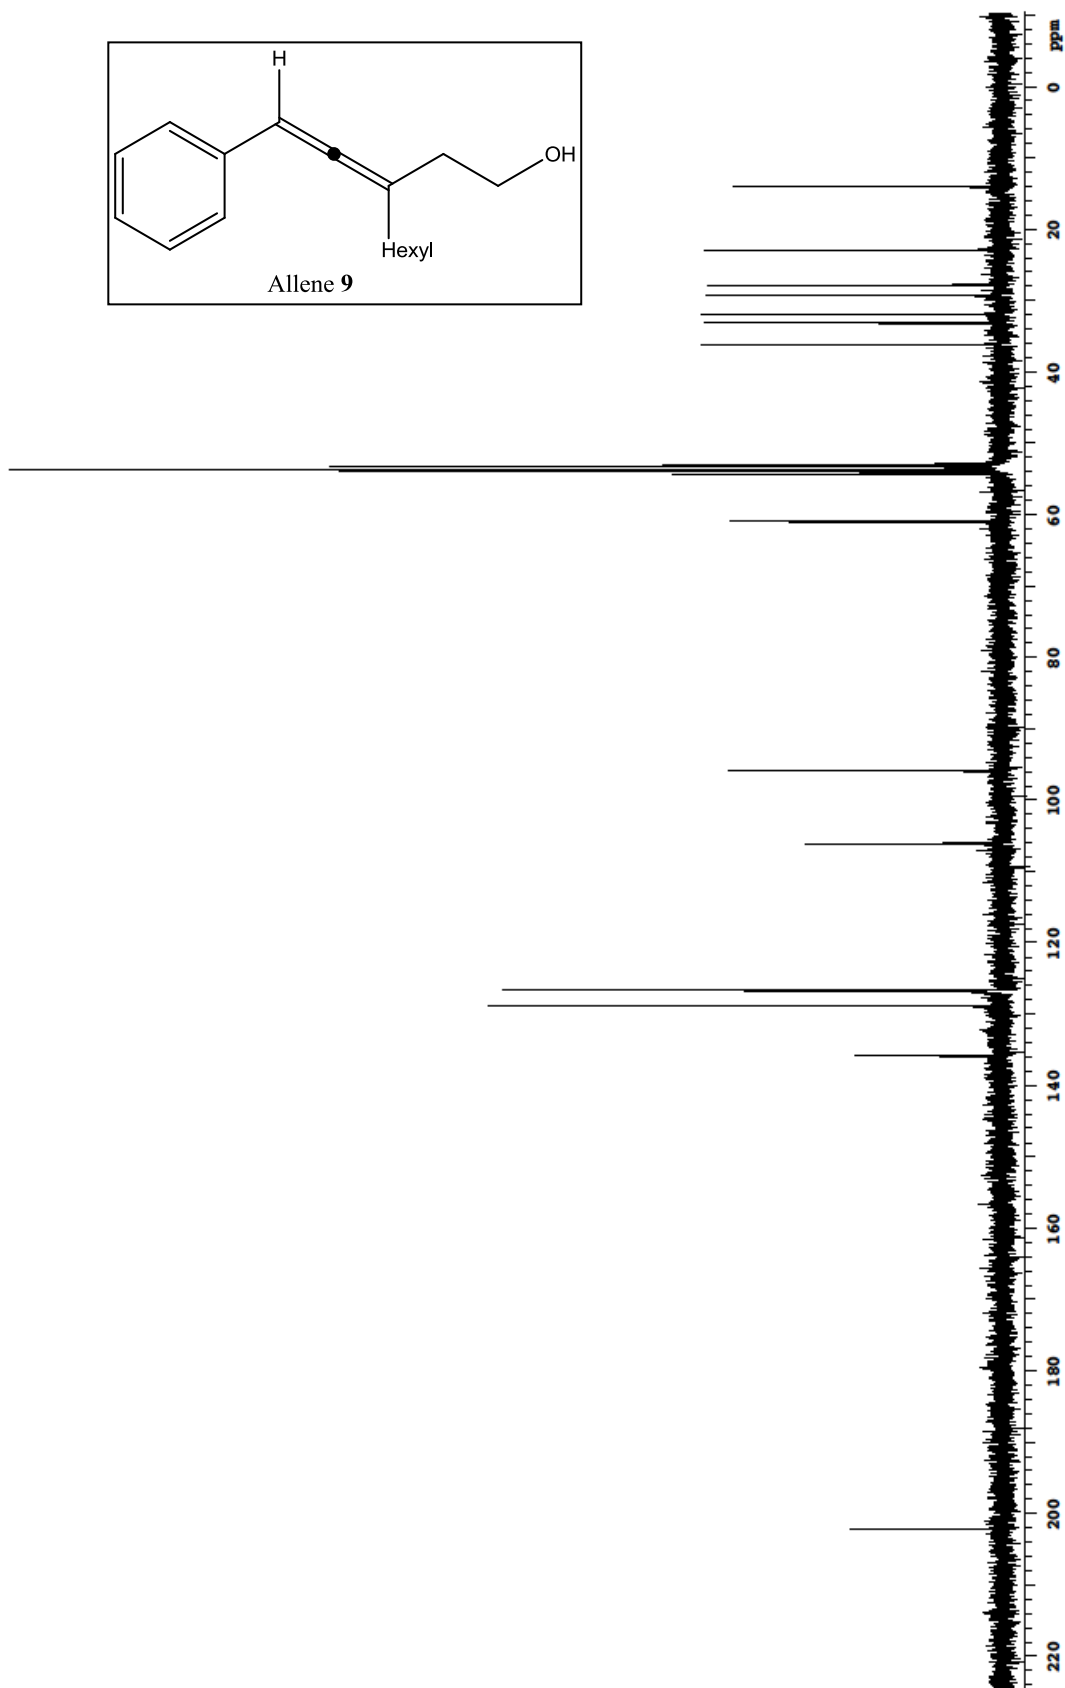



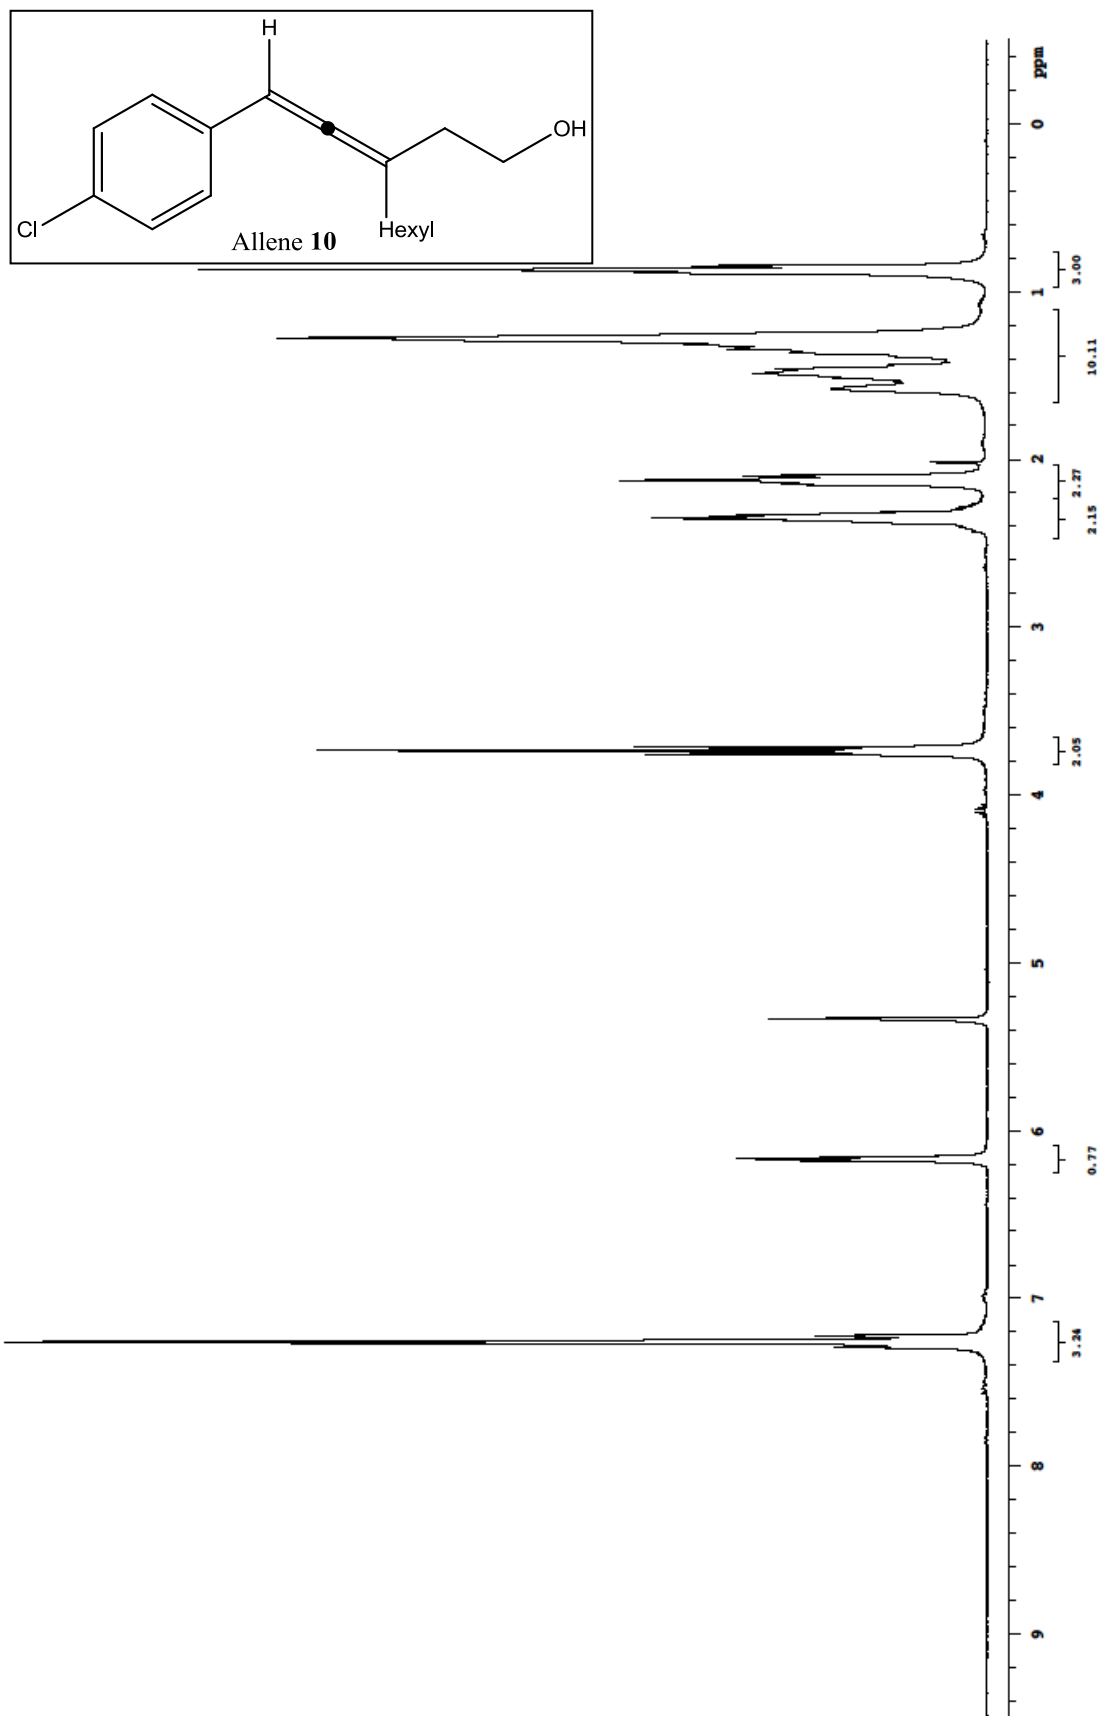

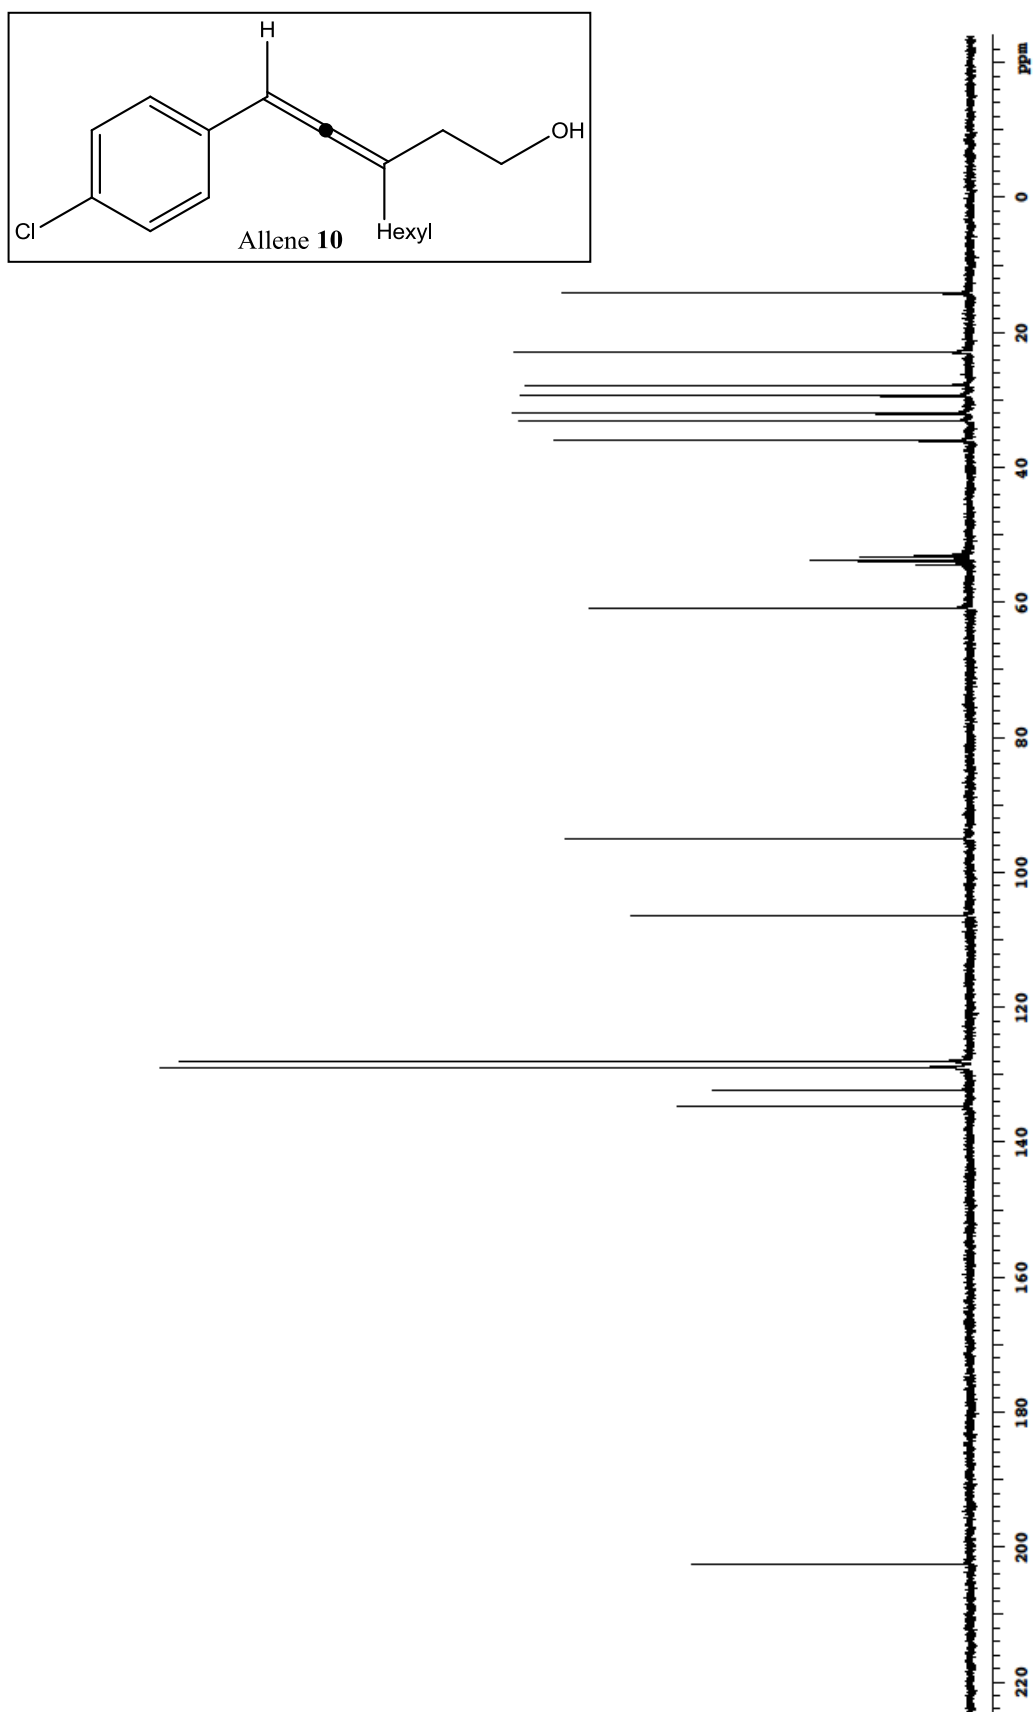

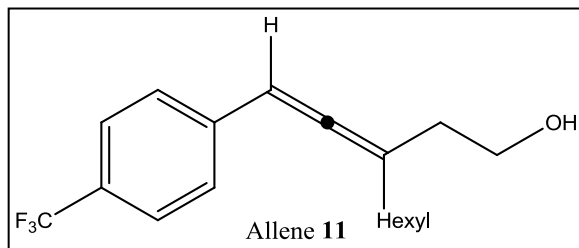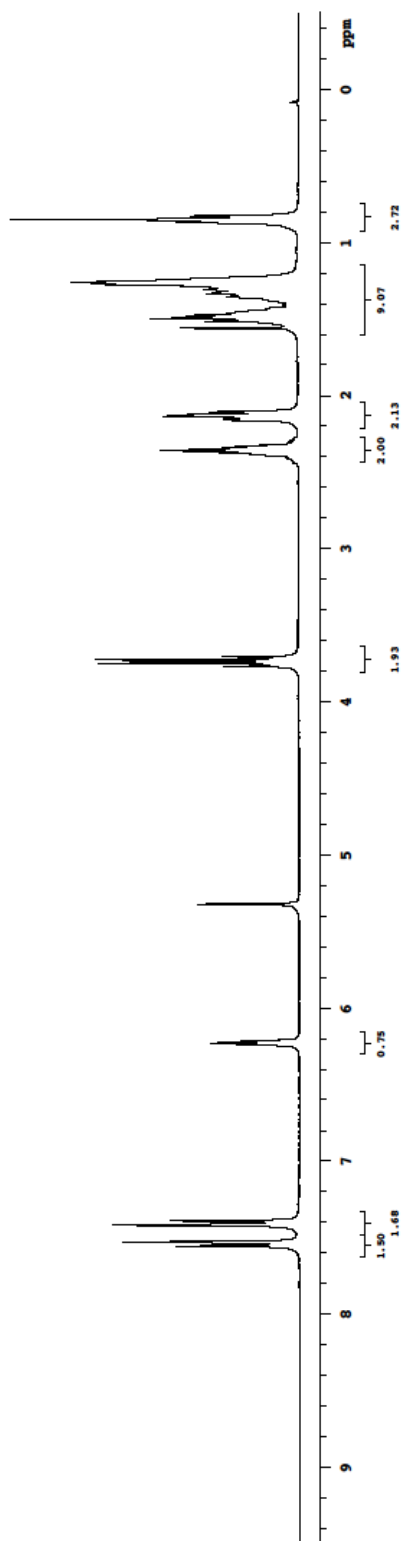

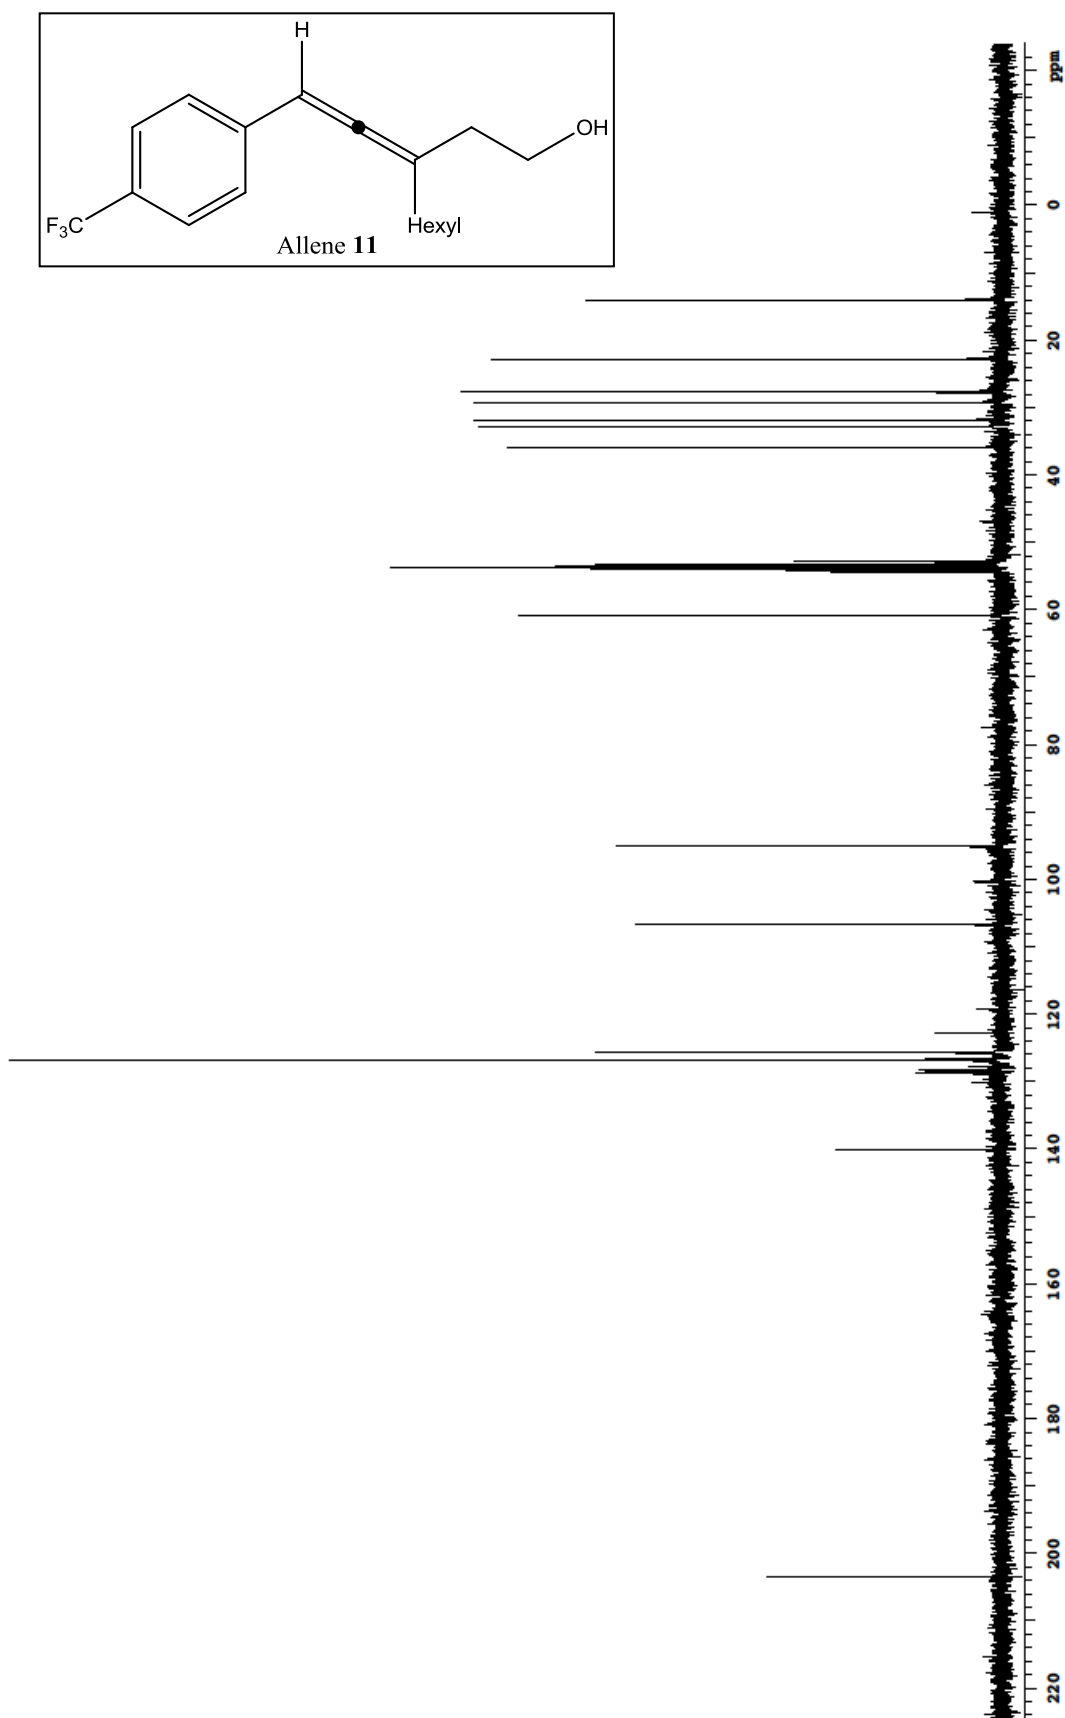

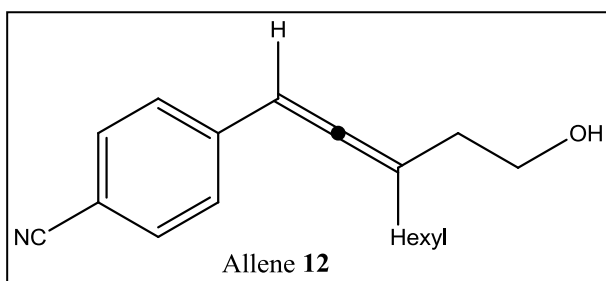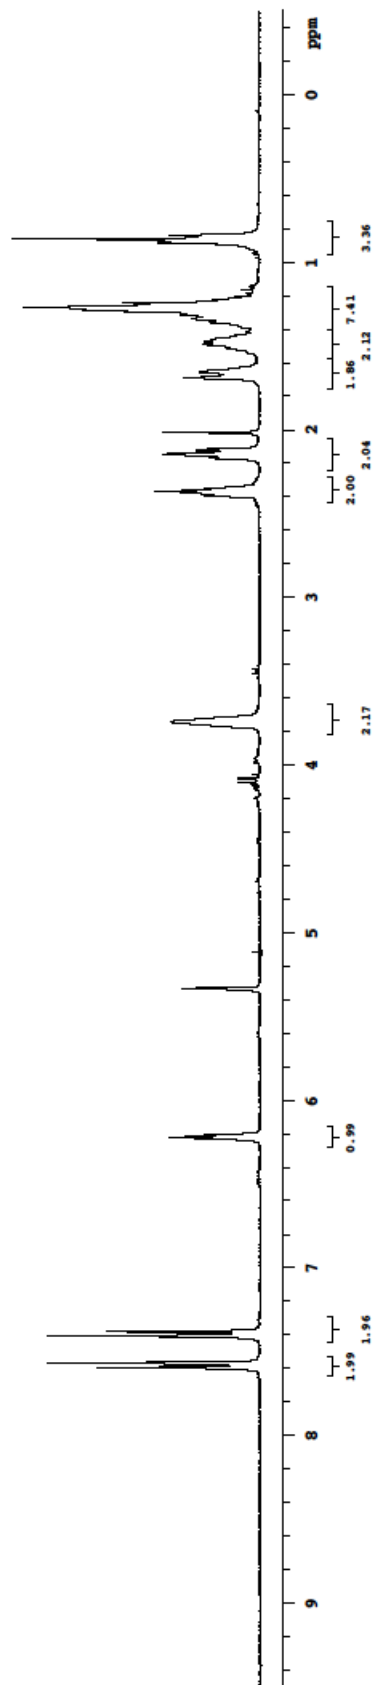

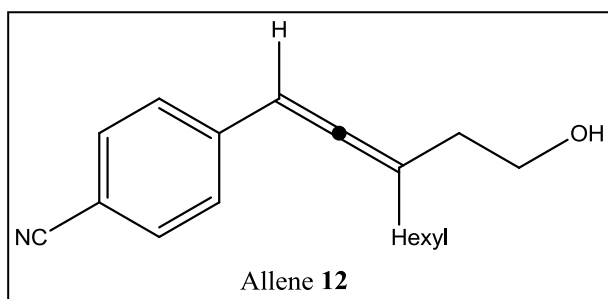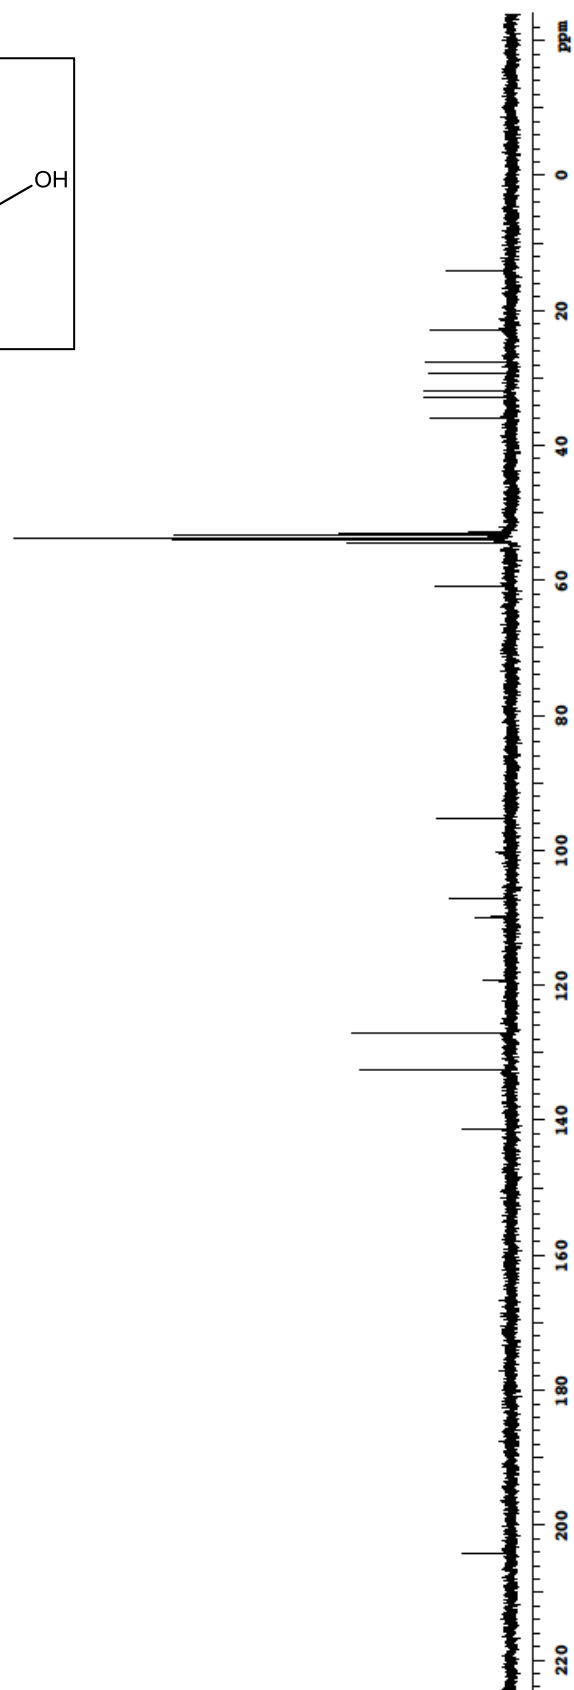

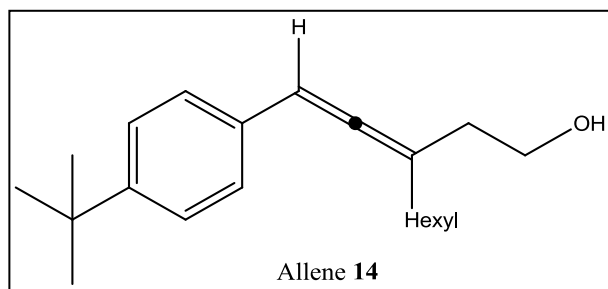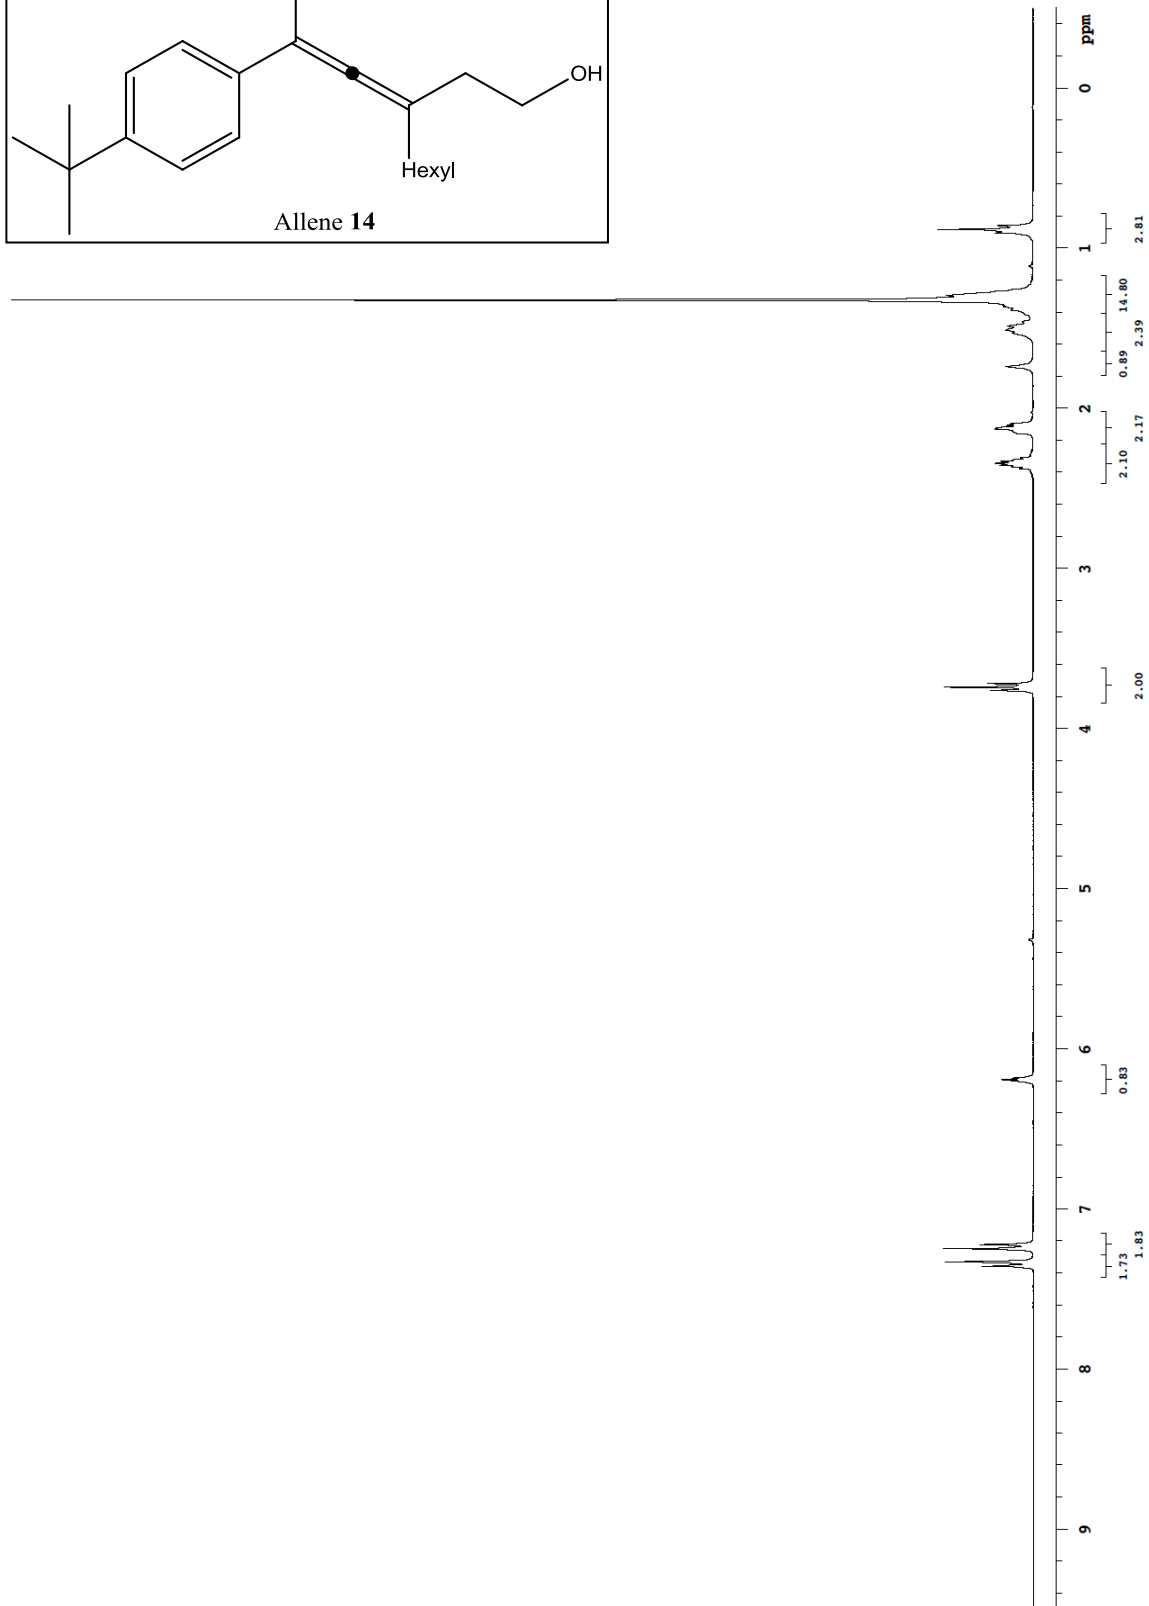

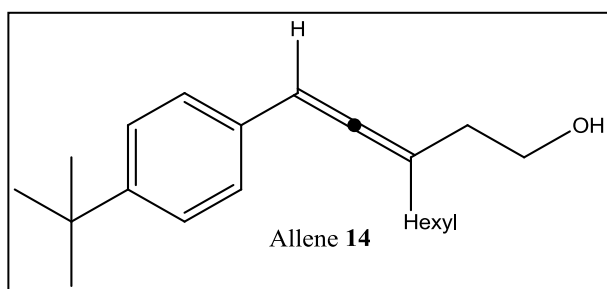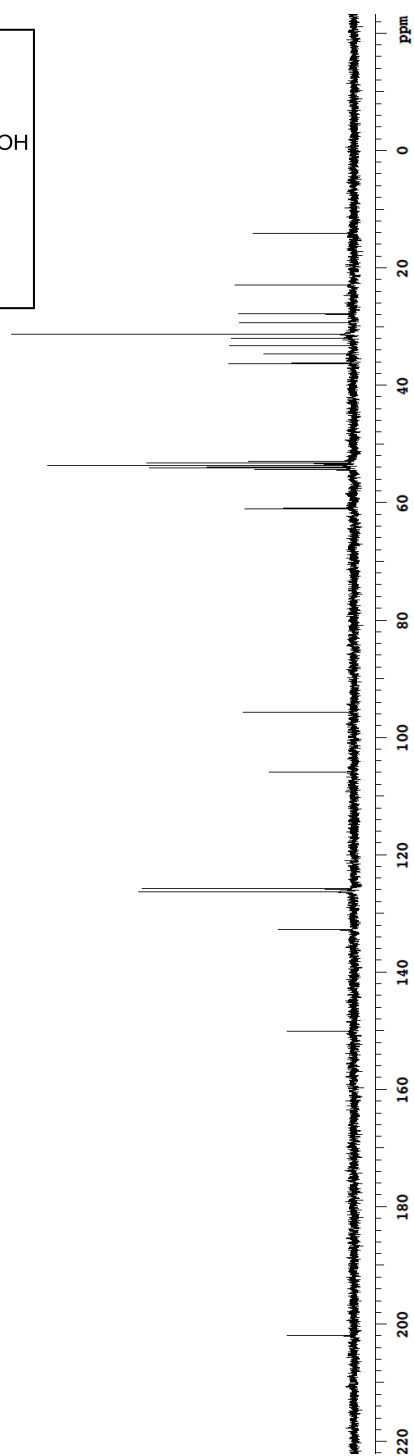



## Computational Study

All geometries were optimized by DFT computations at the B3LYP level with the LANL2DZ basis set which frequently performs well for the transition metal compounds (e.g. Xia, Y.; Dudnik, A. S.; Gevorgyan, V.; Li, Y. *J Am Chem Soc.* **2008**, *130*, 6940–6941 and Soriano, E.; Marco-Contelles, J. *Acc. Chem. Res.* **2009**, *42*, 1026–1036) using Gaussian 03 program (see reference). Force Field calculation indicated that optimized structures were found to be true minima with no imaginary frequency.

**Gaussian 03**, Revision E.01, M. J. Frisch, G. W. Trucks, H. B. Schlegel, G. E. Scuseria, M. A. Robb, J. R. Cheeseman, J. A. Montgomery, Jr., T. Vreven, K. N. Kudin, J. C. Burant, J. M. Millam, S. S. Iyengar, J. Tomasi, V. Barone, B. Mennucci, M. Cossi, G. Scalmani, N. Rega, G. A. Petersson, H. Nakatsuji, M. Hada, M. Ehara, K. Toyota, R. Fukuda, J. Hasegawa, M. Ishida, T. Nakajima, Y. Honda, O. Kitao, H. Nakai, M. Klene, X. Li, J. E. Knox, H. P. Hratchian, J. B. Cross, C. Adamo, J. Jaramillo, R. Gomperts, R. E. Stratmann, O. Yazyev, A. J. Austin, R. Cammi, C. Pomelli, J. W. Ochterski, P. Y. Ayala, K. Morokuma, G. A. Voth, P. Salvador, J. J. Dannenberg, V. G. Zakrzewski, S. Dapprich, A. D. Daniels, M. C. Strain, O. Farkas, D. K. Malick, A. D. Rabuck, K. Raghavachari, J. B. Foresman, J. V. Ortiz, Q. Cui, A. G. Baboul, S. Clifford, J. Cioslowski, B. B. Stefanov, G. Liu, A. Liashenko, P. Piskorz, I. Komaromi, R. L. Martin, D. J. Fox, T. Keith, M. A. Al-Laham, C. Y. Peng, A. Nanayakkara, M. Challacombe, P. M. W. Gill, B. Johnson, W. Chen, M. W. Wong, C. Gonzalez, and J. A. Pople, Gaussian, Inc., Wallingford, CT, 2003.

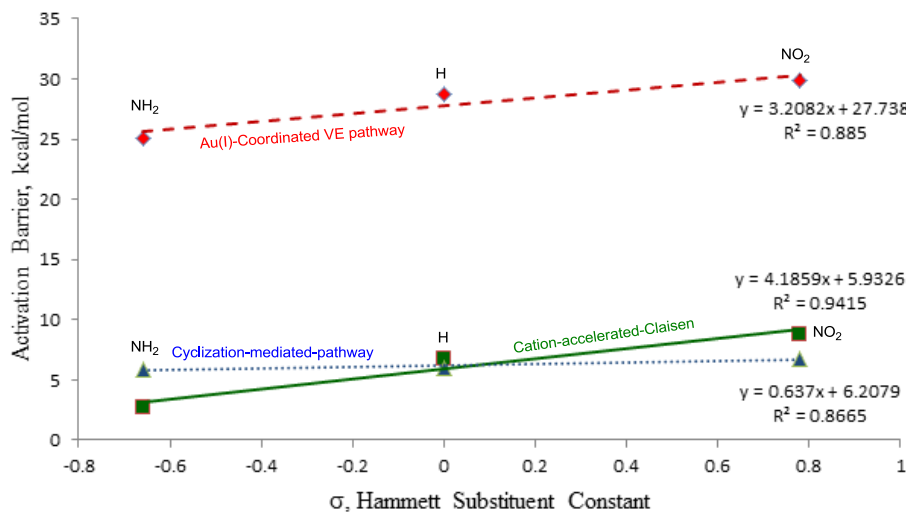

**Figure 1** Correlation of Hammett constants and the activation energies

| <b>Coordination of PMe3Au(I) to the terminal carbon of vinyl ether</b> |                                                                                                                                                                                                                                                                                                                                                                                                                                                                                                                                                                                                                                                                                                                                                                                                                                                                                                                                                                                                                                                                                                                                                                                                                                                                                                                                                                                                                                                                                                                                                                                                                                   |
|------------------------------------------------------------------------|-----------------------------------------------------------------------------------------------------------------------------------------------------------------------------------------------------------------------------------------------------------------------------------------------------------------------------------------------------------------------------------------------------------------------------------------------------------------------------------------------------------------------------------------------------------------------------------------------------------------------------------------------------------------------------------------------------------------------------------------------------------------------------------------------------------------------------------------------------------------------------------------------------------------------------------------------------------------------------------------------------------------------------------------------------------------------------------------------------------------------------------------------------------------------------------------------------------------------------------------------------------------------------------------------------------------------------------------------------------------------------------------------------------------------------------------------------------------------------------------------------------------------------------------------------------------------------------------------------------------------------------|
| Reactant_Ph                                                            | <b>Total Energy = -801.0922963</b><br>C 1.03070700 -0.01349800 -0.88540600<br>H 1.16025700 1.03539700 -1.16703300<br>C 0.08416500 -0.82824800 -1.54167300<br>H -0.19164900 -0.49467000 -2.54426000<br>H 0.18771100 -1.90655400 -1.41324300<br>O 1.79003100 -0.47741000 0.08892600<br>C 2.88679900 0.40775100 0.83062800<br>H 2.57485800 0.22699600 1.86353500<br>C 2.75511700 1.81178900 0.47299400<br>C 2.67190600 3.00899400 0.23136200<br>Au -1.76215200 -0.34023200 -0.46559000<br>P -3.91552000 0.00483200 0.59084300<br>C -5.33645500 0.03359000 -0.63618000<br>H -5.19136800 0.85007000 -1.34938900<br>H -5.36775800 -0.91095500 -1.18691400<br>H -6.28707800 0.17675900 -0.11087600<br>C -4.05418400 1.61807700 1.54156200<br>H -3.88261500 2.46068200 0.86557900<br>H -5.05145500 1.70886800 1.98589500<br>H -3.30184900 1.64487300 2.33502100<br>C -4.35880200 -1.33619400 1.82746500<br>H -4.37624300 -2.30849000 1.32673300<br>H -3.60977000 -1.36644800 2.62387800<br>H -5.34372800 -1.13691500 2.26372500<br>C 4.21234500 -0.25501100 0.54213200<br>C 4.58671900 -1.37675500 1.31331700<br>C 5.79855100 -2.03884100 1.05494100<br>C 6.64344900 -1.58153500 0.02437800<br>C 6.27433800 -0.45944600 -0.74386900<br>C 5.06279100 0.20396500 -0.48619000<br>H 3.93511000 -1.73224300 2.10913600<br>H 6.08551400 -2.89945900 1.65253700<br>H 6.93089900 -0.10241500 -1.53257700<br>H 4.78974700 1.08018700 -1.06878700<br>H 7.58310700 -2.09037800 -0.17363700<br>C 2.60702100 4.45193600 -0.03808500<br>H 1.64989100 4.87596900 0.28761600<br>H 3.40769300 4.97138500 0.50295800<br>H 2.73445600 4.66302700 -1.10657400 |
| Reactant_PhNH2                                                         | <b>Total Energy = -856.4516862</b><br>C 0.74491600 0.11375900 -0.83090600<br>H 0.81885600 1.17149400 -1.10740700<br>C -0.17761600 -0.73210900 -1.50209600<br>H -0.43749800 -0.40122300 -2.51094300<br>H -0.01204300 -1.80570900 -1.39523100<br>O 1.52457000 -0.31453600 0.12861200<br>C 2.66147500 0.67226800 0.89453700<br>H 2.31527100 0.45367000 1.90752800<br>C 2.42371900 2.04628100 0.50463200<br>C 2.23561200 3.22324000 0.22208900<br>Au -2.05802700 -0.36932400 -0.46865100<br>P -4.23793700 -0.14386600 0.57403100<br>C -5.65377300 -0.13768800 -0.65997500                                                                                                                                                                                                                                                                                                                                                                                                                                                                                                                                                                                                                                                                                                                                                                                                                                                                                                                                                                                                                                                             |

|                |                                    |             |             |             |
|----------------|------------------------------------|-------------|-------------|-------------|
|                | H                                  | -5.53719900 | 0.70288500  | -1.35011600 |
|                | H                                  | -5.64389400 | -1.06718000 | -1.23663000 |
|                | H                                  | -6.61247400 | -0.04687000 | -0.13761200 |
|                | C                                  | -4.45684400 | 1.43290000  | 1.57092200  |
|                | H                                  | -4.31774900 | 2.30182600  | 0.92119700  |
|                | H                                  | -5.46013800 | 1.46687800  | 2.00966700  |
|                | H                                  | -3.71147500 | 1.46965700  | 2.37061600  |
|                | C                                  | -4.64110200 | -1.53472400 | 1.76952400  |
|                | H                                  | -4.61205800 | -2.49295100 | 1.24274400  |
|                | H                                  | -3.89997800 | -1.55605500 | 2.57368500  |
|                | H                                  | -5.63819400 | -1.38869300 | 2.19931100  |
|                | C                                  | 3.98241600  | 0.07013000  | 0.59881300  |
|                | C                                  | 4.42343000  | -1.03853400 | 1.36379100  |
|                | C                                  | 5.64765500  | -1.65353700 | 1.10535100  |
|                | C                                  | 6.48485300  | -1.17342300 | 0.05724800  |
|                | C                                  | 6.04414400  | -0.05770300 | -0.71236800 |
|                | C                                  | 4.81723800  | 0.54705000  | -0.44216300 |
|                | H                                  | 3.79680300  | -1.42118800 | 2.16726500  |
|                | H                                  | 5.97192400  | -2.49979100 | 1.70619500  |
|                | H                                  | 6.67707700  | 0.32543600  | -1.50952400 |
|                | H                                  | 4.50622100  | 1.40625400  | -1.03146400 |
|                | N                                  | 7.70070700  | -1.77220700 | -0.20362800 |
|                | C                                  | 2.04806400  | 4.64655300  | -0.09034400 |
|                | H                                  | 1.04417700  | 4.98775800  | 0.18882600  |
|                | H                                  | 2.77609500  | 5.25244600  | 0.46358200  |
|                | H                                  | 2.19602600  | 4.84191000  | -1.15925700 |
|                | H                                  | 8.30352100  | -1.43258000 | -0.93915800 |
|                | H                                  | 8.02329700  | -2.55844100 | 0.34188900  |
| Reactant_PhOMe | <b>Total Energy = -915.6028562</b> |             |             |             |
|                | C                                  | 0.66429700  | -0.42405100 | -0.26774000 |
|                | H                                  | 0.87947800  | 0.29264200  | -1.06557200 |
|                | C                                  | -0.18618000 | -1.52324500 | -0.50844900 |
|                | H                                  | -0.26904800 | -1.82046300 | -1.55599500 |
|                | H                                  | -0.14952500 | -2.33965000 | 0.21434200  |
|                | O                                  | 1.22180200  | -0.21133700 | 0.90822500  |
|                | C                                  | 2.26303300  | 1.00315500  | 1.10559700  |
|                | H                                  | 2.22580400  | 1.03161300  | 2.19723600  |
|                | C                                  | 1.70265700  | 2.20896200  | 0.51488500  |
|                | C                                  | 1.25766900  | 3.25685300  | 0.06625900  |
|                | Au                                 | -2.17695900 | -0.66264500 | -0.20001000 |
|                | P                                  | -4.47263500 | 0.03452400  | 0.13302400  |
|                | C                                  | -5.59833100 | -0.42140300 | -1.29854700 |
|                | H                                  | -5.24009700 | 0.05298600  | -2.21666000 |
|                | H                                  | -5.59239100 | -1.50608400 | -1.44000300 |
|                | H                                  | -6.62244200 | -0.08977400 | -1.09537400 |
|                | C                                  | -4.68842600 | 1.88597300  | 0.36036300  |
|                | H                                  | -4.32433000 | 2.41150400  | -0.52714800 |
|                | H                                  | -5.74618300 | 2.12652300  | 0.51392600  |
|                | H                                  | -4.11267500 | 2.21974500  | 1.22838700  |
|                | C                                  | -5.26535800 | -0.74213000 | 1.64741200  |
|                | H                                  | -5.25152200 | -1.83172700 | 1.55207100  |
|                | H                                  | -4.70403400 | -0.46245600 | 2.54352800  |
|                | H                                  | -6.30177800 | -0.40186200 | 1.74846200  |
|                | C                                  | 3.60322500  | 0.54804100  | 0.60388400  |
|                | C                                  | 4.38271000  | -0.30466100 | 1.41364100  |

|               |                                   |             |             |             |
|---------------|-----------------------------------|-------------|-------------|-------------|
|               | C                                 | 5.62526500  | -0.78556200 | 0.97526400  |
|               | C                                 | 6.10365100  | -0.40643900 | -0.30073800 |
|               | C                                 | 5.33372600  | 0.45532300  | -1.11828600 |
|               | C                                 | 4.09883500  | 0.92621100  | -0.66813300 |
|               | H                                 | 4.01785700  | -0.59966800 | 2.39557100  |
|               | H                                 | 6.20622400  | -1.43605000 | 1.62009900  |
|               | H                                 | 5.73454000  | 0.74170800  | -2.08531800 |
|               | H                                 | 3.52951500  | 1.61027200  | -1.29232600 |
|               | O                                 | 7.30824300  | -0.81362300 | -0.83971700 |
|               | C                                 | 0.75255900  | 4.53254000  | -0.45972900 |
|               | H                                 | -0.17323700 | 4.83190500  | 0.04564900  |
|               | H                                 | 1.49370200  | 5.32610300  | -0.30301000 |
|               | H                                 | 0.55517000  | 4.46902800  | -1.53672100 |
|               | C                                 | 8.18766500  | -1.69047800 | -0.06532100 |
|               | H                                 | 7.69612700  | -2.64815200 | 0.14970900  |
|               | H                                 | 9.05572000  | -1.85570300 | -0.70444400 |
|               | H                                 | 8.50007200  | -1.20620900 | 0.86880600  |
| Reactant_PhCN | <b>Total Energy = -893.304841</b> |             |             |             |
|               | C                                 | 0.50158600  | 0.44173600  | -0.95607700 |
|               | H                                 | 0.49668200  | 1.53179500  | -1.04046200 |
|               | C                                 | -0.37133700 | -0.35240700 | -1.72313000 |
|               | H                                 | -0.74620600 | 0.11831500  | -2.63412500 |
|               | H                                 | -0.14450800 | -1.41672300 | -1.79458000 |
|               | O                                 | 1.36668900  | -0.09791800 | -0.11092600 |
|               | C                                 | 2.34203500  | 0.75899800  | 0.78491100  |
|               | H                                 | 1.96365000  | 0.50278300  | 1.77994000  |
|               | C                                 | 2.20557400  | 2.18325500  | 0.52026200  |
|               | C                                 | 2.11701900  | 3.39407300  | 0.36234400  |
|               | Au                                | -2.20376300 | -0.27989000 | -0.50825400 |
|               | P                                 | -4.33342900 | -0.38573000 | 0.64056000  |
|               | C                                 | -5.79157500 | -0.40313700 | -0.54211000 |
|               | H                                 | -5.78554500 | 0.50575600  | -1.15053700 |
|               | H                                 | -5.71808900 | -1.26958900 | -1.20562100 |
|               | H                                 | -6.73113500 | -0.45675700 | 0.01866800  |
|               | C                                 | -4.65366700 | 1.05666000  | 1.79891100  |
|               | H                                 | -4.62711100 | 1.99464400  | 1.23700100  |
|               | H                                 | -5.63571700 | 0.94728100  | 2.27203600  |
|               | H                                 | -3.88195700 | 1.08795700  | 2.57333200  |
|               | C                                 | -4.53388800 | -1.92489900 | 1.69588700  |
|               | H                                 | -4.43959500 | -2.81674100 | 1.06970700  |
|               | H                                 | -3.75523500 | -1.95195600 | 2.46346400  |
|               | H                                 | -5.51760000 | -1.92493000 | 2.17790200  |
|               | C                                 | 3.71105700  | 0.15251300  | 0.56305500  |
|               | C                                 | 4.06644700  | -1.00019600 | 1.29476000  |
|               | C                                 | 5.31121500  | -1.61248600 | 1.09491500  |
|               | C                                 | 6.21730600  | -1.07054500 | 0.15308200  |
|               | C                                 | 5.86478500  | 0.08864300  | -0.57833300 |
|               | C                                 | 4.61839900  | 0.69496800  | -0.37045000 |
|               | H                                 | 3.37320600  | -1.42260800 | 2.01842400  |
|               | H                                 | 5.58720600  | -2.49785000 | 1.65901900  |
|               | H                                 | 6.56642500  | 0.50451200  | -1.29482300 |
|               | H                                 | 4.35865400  | 1.59263800  | -0.92422900 |
|               | C                                 | 7.49791200  | -1.69446400 | -0.05828200 |
|               | C                                 | 2.04269600  | 4.85136300  | 0.19193700  |
|               | H                                 | 1.10107000  | 5.25112500  | 0.58594500  |

|                |                                    |             |             |             |
|----------------|------------------------------------|-------------|-------------|-------------|
|                | H                                  | 2.86709000  | 5.33551700  | 0.72997100  |
|                | H                                  | 2.12343600  | 5.13163800  | -0.86515300 |
|                | N                                  | 8.54815200  | -2.20723100 | -0.23355900 |
| Reactant_PhNO2 | <b>Total Energy = -1005.554239</b> |             |             |             |
|                | C                                  | 0.12514500  | 0.68917500  | -0.95571000 |
|                | H                                  | 0.06412100  | 1.77979000  | -0.91371500 |
|                | C                                  | -0.72131800 | -0.05747500 | -1.79394600 |
|                | H                                  | -1.14691700 | 0.49336900  | -2.63484900 |
|                | H                                  | -0.44492000 | -1.09379400 | -1.99047500 |
|                | O                                  | 1.04013900  | 0.10148500  | -0.19599000 |
|                | C                                  | 1.96908300  | 0.89676100  | 0.78856900  |
|                | H                                  | 1.56982400  | 0.57103300  | 1.75510800  |
|                | C                                  | 1.83147300  | 2.33606300  | 0.62337600  |
|                | C                                  | 1.74107700  | 3.55479300  | 0.55008400  |
|                | Au                                 | -2.52139700 | -0.21984000 | -0.53341300 |
|                | P                                  | -4.60717900 | -0.58847300 | 0.64067900  |
|                | C                                  | -6.05559200 | 0.33088100  | -0.12115000 |
|                | H                                  | -5.86433400 | 1.40753900  | -0.09939800 |
|                | H                                  | -6.18500200 | 0.01844500  | -1.16133600 |
|                | H                                  | -6.97340800 | 0.11542500  | 0.43682100  |
|                | C                                  | -4.57762800 | -0.06543900 | 2.44369700  |
|                | H                                  | -4.35123900 | 1.00207500  | 2.51651000  |
|                | H                                  | -5.55135500 | -0.26018400 | 2.90639700  |
|                | H                                  | -3.80621400 | -0.62700400 | 2.97839600  |
|                | C                                  | -5.11835900 | -2.39442000 | 0.65551400  |
|                | H                                  | -5.22846100 | -2.75510000 | -0.37123800 |
|                | H                                  | -4.35179500 | -2.99237100 | 1.15654000  |
|                | H                                  | -6.07116200 | -2.51187700 | 1.18316000  |
|                | C                                  | 3.35187100  | 0.31716400  | 0.56337000  |
|                | C                                  | 3.70073100  | -0.87422000 | 1.23366800  |
|                | C                                  | 4.95717100  | -1.46277100 | 1.03001800  |
|                | C                                  | 5.85037500  | -0.83665400 | 0.14586200  |
|                | C                                  | 5.53116500  | 0.35162300  | -0.53133500 |
|                | C                                  | 4.27148800  | 0.92812800  | -0.31409600 |
|                | H                                  | 2.99441700  | -1.34536100 | 1.91279300  |
|                | H                                  | 5.25118900  | -2.37626800 | 1.53426000  |
|                | H                                  | 6.25766400  | 0.79980300  | -1.19975800 |
|                | H                                  | 4.01040500  | 1.85380300  | -0.81822000 |
|                | N                                  | 7.18264100  | -1.45122000 | -0.07884000 |
|                | C                                  | 1.66325000  | 5.02004400  | 0.47925500  |
|                | H                                  | 0.71394900  | 5.38870000  | 0.88494500  |
|                | H                                  | 2.47720400  | 5.46863800  | 1.06209800  |
|                | H                                  | 1.75917400  | 5.37203300  | -0.55482100 |
|                | O                                  | 7.97878900  | -0.86590400 | -0.88716900 |
|                | O                                  | 7.45317100  | -2.53028700 | 0.54754500  |
| Product_Ph     | <b>Total Energy = -801.1196886</b> |             |             |             |
|                | C                                  | 2.27134900  | -2.58296600 | -0.27249000 |
|                | H                                  | 2.97384500  | -3.18854500 | -0.86075200 |
|                | C                                  | 2.78890500  | -1.86166300 | 0.93029000  |
|                | H                                  | 3.50835600  | -2.49233300 | 1.46314100  |
|                | H                                  | 1.97023600  | -1.59419700 | 1.60791400  |
|                | O                                  | 1.09257700  | -2.49329400 | -0.71671700 |
|                | C                                  | 2.16041600  | 1.18649100  | -1.03565100 |
|                | C                                  | 2.84042500  | 0.30175400  | -0.31398700 |

|               |                                   |             |             |             |
|---------------|-----------------------------------|-------------|-------------|-------------|
|               | C                                 | 3.51871400  | -0.58698200 | 0.39663000  |
|               | C                                 | 4.99351100  | -0.45518100 | 0.74558800  |
|               | H                                 | 5.41091500  | 0.47767000  | 0.35703900  |
|               | H                                 | 5.13436600  | -0.47237600 | 1.83509600  |
|               | H                                 | 5.57183700  | -1.29030000 | 0.32590300  |
|               | H                                 | 2.17294400  | 1.07085500  | -2.12296800 |
|               | C                                 | 1.39192200  | 2.34699200  | -0.52535400 |
|               | C                                 | 0.72768300  | 3.18685100  | -1.45119700 |
|               | C                                 | -0.00138100 | 4.30647400  | -1.01012300 |
|               | C                                 | -0.07814600 | 4.60262100  | 0.36461300  |
|               | C                                 | 0.58138800  | 3.77118100  | 1.29552300  |
|               | C                                 | 1.30845600  | 2.65301800  | 0.85602600  |
|               | H                                 | 0.80034500  | 2.97577300  | -2.51668700 |
|               | H                                 | -0.48962100 | 4.95403900  | -1.73370600 |
|               | H                                 | 0.54387300  | 4.01087600  | 2.35546800  |
|               | H                                 | 1.83372200  | 2.02936800  | 1.57621500  |
|               | Au                                | -0.61515200 | -1.30286500 | -0.17690300 |
|               | P                                 | -2.54903100 | -0.03586300 | 0.30262700  |
|               | C                                 | -4.08330500 | -1.09842300 | 0.47600100  |
|               | H                                 | -4.25738600 | -1.65098200 | -0.45153700 |
|               | H                                 | -3.94820100 | -1.81389700 | 1.29186000  |
|               | H                                 | -4.95189600 | -0.46576700 | 0.68887300  |
|               | C                                 | -2.39971500 | 0.93775000  | 1.89586700  |
|               | H                                 | -3.32598300 | 1.49351300  | 2.07871900  |
|               | H                                 | -2.21574400 | 0.25724800  | 2.73187200  |
|               | H                                 | -1.56549400 | 1.64000400  | 1.81435300  |
|               | C                                 | -2.92766900 | 1.22237600  | -1.03319700 |
|               | H                                 | -3.83378600 | 1.77943900  | -0.77058100 |
|               | H                                 | -2.08895700 | 1.91782300  | -1.12837300 |
|               | H                                 | -3.08087400 | 0.71353700  | -1.98902200 |
|               | H                                 | -0.62596900 | 5.47708900  | 0.70560100  |
| Product_PhNH2 | <b>Total Energy = -856.477033</b> |             |             |             |
|               | C                                 | 3.20795600  | 1.75321400  | -0.13767300 |
|               | H                                 | 3.96238200  | 2.34460900  | -0.67320600 |
|               | C                                 | 2.49339300  | 2.38074900  | 1.01286900  |
|               | H                                 | 3.18483400  | 2.99551400  | 1.59836000  |
|               | H                                 | 2.04759200  | 1.61695400  | 1.65950700  |
|               | O                                 | 2.95236800  | 0.60610200  | -0.60629600 |
|               | C                                 | -0.54967500 | 2.21103000  | -1.06935700 |
|               | C                                 | 0.41680600  | 2.75152800  | -0.32992400 |
|               | C                                 | 1.39288400  | 3.29841300  | 0.37888300  |
|               | C                                 | 1.54135500  | 4.79197500  | 0.63056100  |
|               | H                                 | 0.73322200  | 5.35426600  | 0.15492800  |
|               | H                                 | 1.52639400  | 5.00594300  | 1.70835400  |
|               | H                                 | 2.49681800  | 5.16528400  | 0.23516900  |
|               | H                                 | -0.37069900 | 2.14638200  | -2.14701600 |
|               | C                                 | -1.85882600 | 1.70372300  | -0.61749100 |
|               | C                                 | -2.76686600 | 1.18002500  | -1.57092300 |
|               | C                                 | -4.03102600 | 0.70786400  | -1.19812700 |
|               | C                                 | -4.44247800 | 0.74925600  | 0.16172600  |
|               | C                                 | -3.53107900 | 1.26636100  | 1.12691800  |
|               | C                                 | -2.27175900 | 1.73341400  | 0.73934900  |
|               | H                                 | -2.48628000 | 1.16223700  | -2.62305600 |
|               | H                                 | -3.83401400 | 1.32222500  | 2.17080200  |
|               | H                                 | -1.60473700 | 2.14992600  | 1.49153200  |

|               |                                    |             |             |             |
|---------------|------------------------------------|-------------|-------------|-------------|
|               | Au                                 | 1.43521700  | -0.82962000 | -0.13598500 |
|               | P                                  | -0.20675100 | -2.47969200 | 0.25632800  |
|               | C                                  | 0.52077200  | -4.19055700 | 0.49526700  |
|               | H                                  | 1.08640100  | -4.47968300 | -0.39494100 |
|               | H                                  | 1.19606000  | -4.18866900 | 1.35550200  |
|               | H                                  | -0.28160100 | -4.91654500 | 0.66620900  |
|               | C                                  | -1.23883500 | -2.13181600 | 1.78017800  |
|               | H                                  | -1.98385200 | -2.92430200 | 1.91195600  |
|               | H                                  | -0.59517200 | -2.09062900 | 2.66339700  |
|               | H                                  | -1.74774900 | -1.17115000 | 1.66093900  |
|               | C                                  | -1.42397900 | -2.62061200 | -1.16135700 |
|               | H                                  | -2.15005600 | -3.41297100 | -0.94823800 |
|               | H                                  | -1.94970800 | -1.66948800 | -1.28556900 |
|               | H                                  | -0.89011400 | -2.85833000 | -2.08574900 |
|               | H                                  | -4.71536600 | 0.33103900  | -1.95527900 |
|               | N                                  | -5.69781300 | 0.29926600  | 0.54193900  |
|               | H                                  | -6.01945000 | 0.40147100  | 1.49362600  |
|               | H                                  | -6.37188400 | 0.00023000  | -0.14794400 |
| Product_PhOMe | <b>Total Energy = -915.6296023</b> |             |             |             |
|               | C                                  | 3.44774900  | 1.64900400  | -0.27472500 |
|               | H                                  | 4.17795300  | 2.22335700  | -0.86016900 |
|               | C                                  | 2.86476700  | 2.27590000  | 0.94898300  |
|               | H                                  | 3.63759400  | 2.83159600  | 1.49051100  |
|               | H                                  | 2.43546400  | 1.51482900  | 1.61061800  |
|               | O                                  | 3.10576300  | 0.52569300  | -0.74229500 |
|               | C                                  | -0.24761400 | 2.39022500  | -1.03396400 |
|               | C                                  | 0.75782900  | 2.82670500  | -0.28086100 |
|               | C                                  | 1.76902800  | 3.27399400  | 0.44888800  |
|               | C                                  | 1.95202900  | 4.72879600  | 0.85571600  |
|               | H                                  | 1.13378000  | 5.34993100  | 0.48149200  |
|               | H                                  | 1.98734000  | 4.82193800  | 1.95009700  |
|               | H                                  | 2.89590400  | 5.13094000  | 0.46117400  |
|               | H                                  | -0.11753000 | 2.43545300  | -2.11906700 |
|               | C                                  | -1.54762200 | 1.85879100  | -0.57286400 |
|               | C                                  | -2.51079000 | 1.46555900  | -1.52801900 |
|               | C                                  | -3.76836400 | 0.96572700  | -1.14336900 |
|               | C                                  | -4.07887400 | 0.85262400  | 0.22897700  |
|               | C                                  | -3.12377800 | 1.24154200  | 1.20100400  |
|               | C                                  | -1.88055100 | 1.73778000  | 0.80317900  |
|               | H                                  | -2.28562500 | 1.56484000  | -2.58837600 |
|               | H                                  | -4.49094800 | 0.69163500  | -1.90503700 |
|               | H                                  | -3.39971900 | 1.16956300  | 2.24896700  |
|               | H                                  | -1.16624800 | 2.05949600  | 1.55787000  |
|               | Au                                 | 1.59770100  | -0.88711600 | -0.18173500 |
|               | P                                  | -0.05992300 | -2.49867600 | 0.29881900  |
|               | C                                  | 0.62287700  | -4.24190100 | 0.38821300  |
|               | H                                  | 1.09418600  | -4.50398900 | -0.56316000 |
|               | H                                  | 1.37262400  | -4.30588900 | 1.18180400  |
|               | H                                  | -0.18746800 | -4.94862400 | 0.59787700  |
|               | C                                  | -0.93298700 | -2.19344400 | 1.92785900  |
|               | H                                  | -1.66767500 | -2.98588500 | 2.10854800  |
|               | H                                  | -0.20555800 | -2.18279800 | 2.74426900  |
|               | H                                  | -1.44562400 | -1.22822600 | 1.88987000  |
|               | C                                  | -1.40392600 | -2.52673800 | -1.00650000 |
|               | H                                  | -2.16189200 | -3.27241400 | -0.74238200 |

|               |                                    |             |             |             |
|---------------|------------------------------------|-------------|-------------|-------------|
|               | H                                  | -1.87007900 | -1.53961300 | -1.07186500 |
|               | H                                  | -0.96972700 | -2.78033200 | -1.97777500 |
|               | O                                  | -5.27936900 | 0.37750800  | 0.73312100  |
|               | C                                  | -6.37466200 | 0.07759800  | -0.18900300 |
|               | H                                  | -6.65144400 | 0.96644500  | -0.77033000 |
|               | H                                  | -6.10865600 | -0.74600500 | -0.86528800 |
|               | H                                  | -7.20801500 | -0.22254600 | 0.44743800  |
| Product_PhCN  | <b>Total Energy = -893.3338111</b> |             |             |             |
|               | C                                  | 3.32559200  | 1.51130700  | -0.29203500 |
|               | H                                  | 4.06566200  | 2.05029100  | -0.89887000 |
|               | C                                  | 2.84778500  | 2.15239100  | 0.97224700  |
|               | H                                  | 3.69755500  | 2.60111400  | 1.49926700  |
|               | H                                  | 2.36975300  | 1.41546600  | 1.62869700  |
|               | O                                  | 2.89579100  | 0.42170000  | -0.76053500 |
|               | C                                  | -0.16705300 | 2.70083300  | -1.05755900 |
|               | C                                  | 0.83699600  | 2.99882800  | -0.24019600 |
|               | C                                  | 1.84574400  | 3.27885400  | 0.57122100  |
|               | C                                  | 2.10041200  | 4.65470600  | 1.16796800  |
|               | H                                  | 1.32123300  | 5.36484300  | 0.87816900  |
|               | H                                  | 2.13058200  | 4.59915200  | 2.26489800  |
|               | H                                  | 3.06824200  | 5.05163200  | 0.83161700  |
|               | H                                  | -0.01604800 | 2.84606100  | -2.13006900 |
|               | C                                  | -1.49254900 | 2.17411900  | -0.66033400 |
|               | C                                  | -2.42230800 | 1.82507500  | -1.66902900 |
|               | C                                  | -3.67955600 | 1.29841600  | -1.33936500 |
|               | C                                  | -4.03385900 | 1.11283700  | 0.01771100  |
|               | C                                  | -3.11627600 | 1.47800500  | 1.03576300  |
|               | C                                  | -1.86281100 | 1.99989200  | 0.69718800  |
|               | H                                  | -2.16169900 | 1.97071600  | -2.71490400 |
|               | H                                  | -3.40262100 | 1.36424300  | 2.07763600  |
|               | H                                  | -1.17111500 | 2.29237500  | 1.48320700  |
|               | Au                                 | 1.38049700  | -0.98670700 | -0.19271100 |
|               | P                                  | -0.28232500 | -2.59437800 | 0.29458300  |
|               | C                                  | 0.37757700  | -4.34790600 | 0.25527600  |
|               | H                                  | 0.79169000  | -4.56549000 | -0.73317700 |
|               | H                                  | 1.16794200  | -4.46377000 | 1.00210800  |
|               | H                                  | -0.43165000 | -5.05381200 | 0.47176200  |
|               | C                                  | -1.04967200 | -2.35968200 | 1.98779500  |
|               | H                                  | -1.80900600 | -3.13005600 | 2.16120300  |
|               | H                                  | -0.27828100 | -2.43363100 | 2.75935100  |
|               | H                                  | -1.51854700 | -1.37346100 | 2.04466100  |
|               | C                                  | -1.69912100 | -2.53712800 | -0.93063900 |
|               | H                                  | -2.45000100 | -3.28925100 | -0.66489800 |
|               | H                                  | -2.15968600 | -1.54551400 | -0.91755200 |
|               | H                                  | -1.32445700 | -2.74077300 | -1.93772900 |
|               | H                                  | -4.38903600 | 1.03988500  | -2.11979100 |
|               | C                                  | -5.31215400 | 0.55220700  | 0.36689700  |
|               | N                                  | -6.35481400 | 0.07647800  | 0.65809400  |
| Product_PhNO2 | <b>Total Energy = -1005.584553</b> |             |             |             |
|               | C                                  | 2.87882100  | 1.91603900  | -0.88043000 |
|               | H                                  | 3.22338500  | 2.59117000  | -1.67601600 |
|               | C                                  | 2.97719700  | 2.39702500  | 0.53641000  |
|               | H                                  | 3.98194400  | 2.81513100  | 0.69577200  |
|               | H                                  | 2.84011100  | 1.56287000  | 1.23787500  |



|       |                                                                         |             |             |             |
|-------|-------------------------------------------------------------------------|-------------|-------------|-------------|
|       | O                                                                       | 2.40527400  | 0.80774600  | -1.24502200 |
|       | C                                                                       | -0.31020800 | 3.52854100  | -0.61559700 |
|       | C                                                                       | 0.80869400  | 3.54829400  | 0.10225500  |
|       | C                                                                       | 1.92472000  | 3.49928300  | 0.81391500  |
|       | C                                                                       | 2.24287400  | 4.44104300  | 1.96531600  |
|       | H                                                                       | 1.40388500  | 5.11011800  | 2.17419800  |
|       | H                                                                       | 2.47302100  | 3.87545300  | 2.87906000  |
|       | H                                                                       | 3.12049300  | 5.05790400  | 1.72847000  |
|       | H                                                                       | -0.38000900 | 4.15956800  | -1.50361000 |
|       | C                                                                       | -1.47937500 | 2.66640600  | -0.33002800 |
|       | C                                                                       | -2.56057300 | 2.63583200  | -1.24293700 |
|       | C                                                                       | -3.63135900 | 1.74780200  | -1.06122200 |
|       | C                                                                       | -3.60351800 | 0.88177200  | 0.04409500  |
|       | C                                                                       | -2.57073400 | 0.92619800  | 1.00035700  |
|       | C                                                                       | -1.51730800 | 1.82227500  | 0.80993500  |
|       | H                                                                       | -2.55485800 | 3.29505000  | -2.10741200 |
|       | H                                                                       | -2.61875500 | 0.27571300  | 1.86706000  |
|       | H                                                                       | -0.71541800 | 1.87661700  | 1.54136800  |
|       | Au                                                                      | 1.42571200  | -0.90206100 | -0.37360300 |
|       | P                                                                       | 0.32999300  | -2.86288300 | 0.37337200  |
|       | C                                                                       | 1.03703300  | -4.39359300 | -0.44561400 |
|       | H                                                                       | 0.91314900  | -4.32387800 | -1.52998700 |
|       | H                                                                       | 2.10293300  | -4.48003400 | -0.21702600 |
|       | H                                                                       | 0.51400100  | -5.28367900 | -0.07904700 |
|       | C                                                                       | 0.50941200  | -3.13247600 | 2.21916800  |
|       | H                                                                       | 0.00143700  | -4.05863500 | 2.50954100  |
|       | H                                                                       | 1.56823500  | -3.20395700 | 2.48259300  |
|       | H                                                                       | 0.06402400  | -2.29458100 | 2.76258800  |
|       | C                                                                       | -1.50753000 | -2.87970600 | 0.01061600  |
|       | H                                                                       | -1.94077500 | -3.82077400 | 0.36692600  |
|       | H                                                                       | -2.00986200 | -2.05022600 | 0.51417700  |
|       | H                                                                       | -1.67230400 | -2.79439100 | -1.06729000 |
|       | H                                                                       | -4.45956300 | 1.70390700  | -1.76017100 |
|       | N                                                                       | -4.66040600 | -0.13190400 | 0.19841000  |
|       | O                                                                       | -5.70219300 | -0.04452900 | -0.53142600 |
|       | O                                                                       | -4.45335800 | -1.07725900 | 1.04503200  |
| TS_Ph | <b>Total Energy = -801.0466061, Frequency -396.5274 cm<sup>-1</sup></b> |             |             |             |
|       | C                                                                       | -0.93725000 | -0.23394500 | -0.26518000 |
|       | H                                                                       | -1.04113400 | -0.56326900 | -1.31505900 |
|       | C                                                                       | -0.33165400 | 1.09678600  | -0.07538500 |
|       | H                                                                       | -0.03914800 | 1.67898100  | -0.95094400 |
|       | H                                                                       | -0.10388800 | 1.45035100  | 0.93387200  |
|       | O                                                                       | -1.40656100 | -0.92238800 | 0.67669200  |
|       | C                                                                       | -3.84004400 | 0.62460600  | 1.16636600  |
|       | C                                                                       | -2.99502700 | 1.54864900  | 0.64476200  |
|       | C                                                                       | -2.04697900 | 2.26532300  | 0.18856500  |
|       | C                                                                       | -1.62504800 | 3.64067700  | -0.19725800 |
|       | H                                                                       | -2.43180300 | 4.34297300  | 0.04678100  |
|       | H                                                                       | -0.72575900 | 3.95483500  | 0.34589200  |
|       | H                                                                       | -1.42361800 | 3.71537600  | -1.27270600 |
|       | H                                                                       | -3.77518600 | 0.45298400  | 2.24298600  |
|       | C                                                                       | -4.85665600 | -0.12993400 | 0.45518300  |
|       | C                                                                       | -5.62769900 | -1.07932200 | 1.18050300  |
|       | C                                                                       | -6.61314100 | -1.83592900 | 0.53248100  |
|       | C                                                                       | -6.84581300 | -1.65242900 | -0.84622400 |

|          |                                                                           |             |             |             |
|----------|---------------------------------------------------------------------------|-------------|-------------|-------------|
|          | C                                                                         | -6.08968700 | -0.70758600 | -1.57701000 |
|          | C                                                                         | -5.10360100 | 0.04877000  | -0.93497200 |
|          | H                                                                         | -5.44277600 | -1.22159900 | 2.24306100  |
|          | H                                                                         | -7.19783200 | -2.56168100 | 1.08996200  |
|          | H                                                                         | -6.28145300 | -0.56726400 | -2.63710400 |
|          | H                                                                         | -4.52954900 | 0.78542900  | -1.49165100 |
|          | Au                                                                        | 1.82221300  | 0.18757100  | -0.06293300 |
|          | P                                                                         | 4.04801800  | -0.71612100 | -0.01119700 |
|          | C                                                                         | 4.27352700  | -2.14574800 | -1.20485700 |
|          | H                                                                         | 3.56757700  | -2.94438600 | -0.96039000 |
|          | H                                                                         | 4.08174400  | -1.80773300 | -2.22711100 |
|          | H                                                                         | 5.29621500  | -2.53294000 | -1.13743500 |
|          | C                                                                         | 5.37434600  | 0.53423000  | -0.45416800 |
|          | H                                                                         | 6.36147200  | 0.06022800  | -0.41970700 |
|          | H                                                                         | 5.19545300  | 0.92313800  | -1.46051300 |
|          | H                                                                         | 5.34855900  | 1.36647600  | 0.25490500  |
|          | C                                                                         | 4.51673100  | -1.38272600 | 1.67855500  |
|          | H                                                                         | 5.53323800  | -1.79052300 | 1.65188200  |
|          | H                                                                         | 4.46855400  | -0.57953900 | 2.41925300  |
|          | H                                                                         | 3.81729000  | -2.17108000 | 1.97042800  |
|          | H                                                                         | -7.61258800 | -2.23646300 | -1.34841500 |
| TS_PhNH2 | <b>Total Energy = -856.4117518, Frequency = -440.0879 cm<sup>-1</sup></b> |             |             |             |
|          | C                                                                         | -0.60748800 | -0.18787000 | -0.18123800 |
|          | H                                                                         | -0.76390900 | -0.59631500 | -1.19704200 |
|          | C                                                                         | 0.00378000  | 1.15851500  | -0.13045000 |
|          | H                                                                         | 0.33619000  | 1.62151500  | -1.06208700 |
|          | H                                                                         | 0.31952400  | 1.56875000  | 0.83357500  |
|          | O                                                                         | -1.03328000 | -0.79418800 | 0.83208300  |
|          | C                                                                         | -3.53661300 | 1.01312700  | 1.21038500  |
|          | C                                                                         | -2.60092400 | 1.76149200  | 0.56867400  |
|          | C                                                                         | -1.59817300 | 2.33576700  | 0.02418800  |
|          | C                                                                         | -1.16306300 | 3.66410000  | -0.51129200 |
|          | H                                                                         | -1.94911000 | 4.40563600  | -0.32809900 |
|          | H                                                                         | -0.24469800 | 4.01252600  | -0.02229100 |
|          | H                                                                         | -0.97900400 | 3.62189400  | -1.59233700 |
|          | H                                                                         | -3.47412000 | 0.99291700  | 2.30089300  |
|          | C                                                                         | -4.62563800 | 0.27721300  | 0.62343300  |
|          | C                                                                         | -5.50525200 | -0.45932100 | 1.47174000  |
|          | C                                                                         | -6.56752700 | -1.19115000 | 0.95487700  |
|          | C                                                                         | -6.80382400 | -1.21601500 | -0.45221900 |
|          | C                                                                         | -5.93094800 | -0.47774600 | -1.31191200 |
|          | C                                                                         | -4.87209000 | 0.24715700  | -0.78277200 |
|          | H                                                                         | -5.33611900 | -0.45134600 | 2.54652400  |
|          | H                                                                         | -7.22480700 | -1.74782400 | 1.61828000  |
|          | H                                                                         | -6.10941300 | -0.48574300 | -2.38482400 |
|          | H                                                                         | -4.22306700 | 0.81272600  | -1.44696900 |
|          | Au                                                                        | 2.15526800  | 0.15168100  | -0.08921000 |
|          | P                                                                         | 4.35324000  | -0.81717600 | 0.01042300  |
|          | C                                                                         | 4.57197100  | -2.24596700 | -1.18582700 |
|          | H                                                                         | 3.83974500  | -3.02719500 | -0.96325800 |
|          | H                                                                         | 4.41388100  | -1.89747000 | -2.21033700 |
|          | H                                                                         | 5.58236000  | -2.66007400 | -1.09597500 |
|          | C                                                                         | 5.72699600  | 0.39630000  | -0.38985200 |
|          | H                                                                         | 6.69904500  | -0.10581600 | -0.33197300 |
|          | H                                                                         | 5.58563600  | 0.79542500  | -1.39819100 |

|          |                                                                          |
|----------|--------------------------------------------------------------------------|
|          | H 5.70570400 1.22539000 0.32306800                                       |
|          | C 4.75990600 -1.50753000 1.70687700                                      |
|          | H 5.76384400 -1.94621400 1.70343900                                      |
|          | H 4.71690200 -0.70734300 2.45114100                                      |
|          | H 4.02904000 -2.27517900 1.97613600                                      |
|          | N -7.85423500 -1.93297600 -0.97511000                                    |
|          | H -8.03213900 -1.95191900 -1.96969100                                    |
|          | H -8.48107000 -2.45360800 -0.37728600                                    |
| TS_PhOMe | <b>Total Energy = -915.5606879, Frequency = -426.604 cm<sup>-1</sup></b> |
|          | C -0.33470400 -0.07527300 -0.15287200                                    |
|          | H -0.51720800 -0.50965700 -1.15314600                                    |
|          | C 0.37945500 1.21776000 -0.14602500                                      |
|          | H 0.70979600 1.64641400 -1.09425000                                      |
|          | H 0.70176600 1.65135800 0.80508500                                       |
|          | O -0.80678400 -0.61150400 0.88007100                                     |
|          | C -3.14905400 1.30885400 1.21564700                                      |
|          | C -2.19173300 2.01210100 0.55802400                                      |
|          | C -1.17276200 2.53370700 -0.00394700                                     |
|          | C -0.64432200 3.80997000 -0.57173500                                     |
|          | H -1.37224300 4.61119800 -0.39710900                                     |
|          | H 0.30150900 4.09994800 -0.09798500                                      |
|          | H -0.47715600 3.73174300 -1.65314900                                     |
|          | H -3.08154300 1.29593600 2.30580300                                      |
|          | C -4.27246200 0.61070600 0.63603400                                      |
|          | C -5.17117800 -0.08056900 1.49369800                                     |
|          | C -6.27008300 -0.77868600 0.98636500                                     |
|          | C -6.49360400 -0.79389700 -0.41288800                                    |
|          | C -5.60883400 -0.10485800 -1.28741000                                    |
|          | C -4.52001300 0.58400500 -0.77059300                                     |
|          | H -4.99647700 -0.07116000 2.56745300                                     |
|          | H -6.93808500 -1.29926500 1.66373000                                     |
|          | H -5.81770700 -0.13312400 -2.35197600                                    |
|          | H -3.85248000 1.11964400 -1.44055300                                     |
|          | Au 2.45684700 0.11193300 -0.08926200                                     |
|          | P 4.60429600 -0.96262900 0.00985500                                      |
|          | C 4.92028200 -2.11099200 -1.43956600                                     |
|          | H 4.15781600 -2.89466900 -1.46176700                                     |
|          | H 4.87293700 -1.54746700 -2.37561500                                     |
|          | H 5.90989100 -2.57126900 -1.34358500                                     |
|          | C 6.03786900 0.24813600 0.02046900                                       |
|          | H 6.98758300 -0.29603600 0.06849700                                      |
|          | H 6.01506800 0.85584200 -0.88851800                                      |
|          | H 5.95612400 0.90891100 0.88807300                                       |
|          | C 4.81399300 -2.01570100 1.54809100                                      |
|          | H 5.80096700 -2.49129800 1.54485400                                      |
|          | H 4.71612500 -1.39057900 2.44007700                                      |
|          | H 4.03925000 -2.78704000 1.57474400                                      |
|          | O -7.53706200 -1.44025700 -1.02908900                                    |
|          | C -8.52351500 -2.17377900 -0.22901400                                    |
|          | H -8.04495900 -2.99308700 0.32159400                                     |
|          | H -9.04129700 -1.49849300 0.46321800                                     |
|          | H -9.23029000 -2.57599100 -0.95512600                                    |
| TS_PhCN  | <b>Total Energy = -893.258332, Frequency = -381.6414 cm<sup>-1</sup></b> |
|          | C -0.52879700 -0.02793700 -0.16654300                                    |

|          |                                                                           |             |             |             |
|----------|---------------------------------------------------------------------------|-------------|-------------|-------------|
|          | H                                                                         | -0.70245600 | -0.51245400 | -1.14412800 |
|          | C                                                                         | 0.22022000  | 1.23773800  | -0.20805900 |
|          | H                                                                         | 0.51945300  | 1.65060700  | -1.17278700 |
|          | H                                                                         | 0.51235100  | 1.72851800  | 0.72378200  |
|          | O                                                                         | -1.03931600 | -0.49730600 | 0.88500100  |
|          | C                                                                         | -3.20374000 | 1.28526700  | 1.24612000  |
|          | C                                                                         | -2.35109300 | 2.07044500  | 0.54114700  |
|          | C                                                                         | -1.38720400 | 2.63174600  | -0.06849700 |
|          | C                                                                         | -0.85456200 | 3.87221300  | -0.69104400 |
|          | H                                                                         | -1.56986500 | 4.68813700  | -0.52643600 |
|          | H                                                                         | 0.10368600  | 4.16727100  | -0.24776300 |
|          | H                                                                         | -0.71625300 | 3.75540400  | -1.77242100 |
|          | H                                                                         | -3.07081600 | 1.25997500  | 2.32938300  |
|          | C                                                                         | -4.31475400 | 0.51266500  | 0.71397000  |
|          | C                                                                         | -5.07861000 | -0.28354000 | 1.60886400  |
|          | C                                                                         | -6.14921900 | -1.05253400 | 1.14283300  |
|          | C                                                                         | -6.47993200 | -1.03445800 | -0.23420300 |
|          | C                                                                         | -5.72825100 | -0.23609700 | -1.13617400 |
|          | C                                                                         | -4.65929900 | 0.52774100  | -0.66573600 |
|          | H                                                                         | -4.82234000 | -0.30206700 | 2.66527800  |
|          | H                                                                         | -6.72993300 | -1.66336200 | 1.82655300  |
|          | H                                                                         | -5.99676300 | -0.22357700 | -2.18796600 |
|          | H                                                                         | -4.09264800 | 1.14801800  | -1.35480000 |
|          | Au                                                                        | 2.26777500  | 0.12158700  | -0.10877100 |
|          | P                                                                         | 4.40645700  | -0.96559800 | 0.02076200  |
|          | C                                                                         | 4.27864800  | -2.83080600 | -0.13380700 |
|          | H                                                                         | 3.63791500  | -3.22409600 | 0.66031600  |
|          | H                                                                         | 3.84013900  | -3.09291200 | -1.10076600 |
|          | H                                                                         | 5.27403800  | -3.28142200 | -0.05373400 |
|          | C                                                                         | 5.59615300  | -0.41870400 | -1.32224600 |
|          | H                                                                         | 6.55089900  | -0.94482200 | -1.21300500 |
|          | H                                                                         | 5.17207200  | -0.64172700 | -2.30531300 |
|          | H                                                                         | 5.76739600  | 0.65892400  | -1.24863400 |
|          | C                                                                         | 5.28450200  | -0.64441800 | 1.64700000  |
|          | H                                                                         | 6.24914100  | -1.16372100 | 1.66057500  |
|          | H                                                                         | 5.45079200  | 0.42919600  | 1.77228700  |
|          | H                                                                         | 4.66893400  | -1.00457800 | 2.47600200  |
|          | C                                                                         | -7.57954900 | -1.82243300 | -0.72246800 |
|          | N                                                                         | -8.48134000 | -2.47079600 | -1.12741200 |
| TS_PhNO2 | <b>Total Energy = -1005.506778, Frequency = -367.4761 cm<sup>-1</sup></b> |             |             |             |
|          | C                                                                         | -0.21764700 | 0.11534800  | -0.12995200 |
|          | H                                                                         | -0.42237700 | -0.38695400 | -1.09202100 |
|          | C                                                                         | 0.59268500  | 1.33867000  | -0.20951500 |
|          | H                                                                         | 0.89643200  | 1.71660400  | -1.18695300 |
|          | H                                                                         | 0.91398400  | 1.84211300  | 0.70543700  |
|          | O                                                                         | -0.74719800 | -0.29791900 | 0.93758000  |
|          | C                                                                         | -2.77716500 | 1.53638600  | 1.29314900  |
|          | C                                                                         | -1.92929200 | 2.30069500  | 0.55998300  |
|          | C                                                                         | -0.96473800 | 2.82172100  | -0.08141400 |
|          | C                                                                         | -0.38920500 | 4.01793100  | -0.74688900 |
|          | H                                                                         | -1.06832700 | 4.86744200  | -0.59812600 |
|          | H                                                                         | 0.58572700  | 4.28629900  | -0.32374100 |
|          | H                                                                         | -0.27085800 | 3.86366700  | -1.82579400 |
|          | H                                                                         | -2.62456200 | 1.52129900  | 2.37370200  |
|          | C                                                                         | -3.91312700 | 0.77606700  | 0.78853200  |

|    |             |             |             |
|----|-------------|-------------|-------------|
| C  | -4.66718600 | -0.00217100 | 1.70623300  |
| C  | -5.75759400 | -0.76311200 | 1.26914200  |
| C  | -6.08683200 | -0.73255900 | -0.09640300 |
| C  | -5.36778500 | 0.03453100  | -1.03327600 |
| C  | -4.28118000 | 0.78888900  | -0.58463900 |
| H  | -4.38901900 | -0.01570500 | 2.75685900  |
| H  | -6.34533000 | -1.36770900 | 1.95036700  |
| H  | -5.67214200 | 0.02750100  | -2.07379300 |
| H  | -3.71973800 | 1.39840200  | -1.28700500 |
| Au | 2.57427300  | 0.10956300  | -0.10693400 |
| P  | 4.64684600  | -1.10071000 | 0.00772600  |
| C  | 4.65630700  | -2.37417200 | 1.38488100  |
| H  | 4.50811800  | -1.87825500 | 2.34823000  |
| H  | 3.84447900  | -3.09034900 | 1.23077200  |
| H  | 5.61374400  | -2.90661700 | 1.39446300  |
| C  | 5.02814400  | -2.04315300 | -1.56853600 |
| H  | 5.97561800  | -2.58265900 | -1.46096400 |
| H  | 4.22708600  | -2.75840000 | -1.77489700 |
| H  | 5.10298500  | -1.34602300 | -2.40784400 |
| C  | 6.13072800  | 0.00423000  | 0.31636800  |
| H  | 7.04348900  | -0.60023200 | 0.35823900  |
| H  | 6.22019800  | 0.73790900  | -0.48969400 |
| H  | 6.00593700  | 0.53493800  | 1.26440100  |
| N  | -7.23895700 | -1.53786200 | -0.57262700 |
| O  | -7.51122600 | -1.50378400 | -1.82003100 |
| O  | -7.88653900 | -2.21815500 | 0.29153700  |

| Reactant_Ph | <b>Coordination of PMe<sub>3</sub>Au(I) to the Alkyne (Cyclization-Mediated Pathway)</b> |             |             |                                     |             |             |             |
|-------------|------------------------------------------------------------------------------------------|-------------|-------------|-------------------------------------|-------------|-------------|-------------|
|             | <u>B3LYP/LANL2DZ</u>                                                                     |             |             | <u>M05-2X/LANL2DZ</u>               |             |             |             |
|             | <b>Total Energy = -801.0745515</b>                                                       |             |             | <b>Total Energy = -800.83386033</b> |             |             |             |
| C           | 4.18917500                                                                               | -1.22832100 | 0.05228000  | C                                   | 4.25549900  | -0.21189300 | 0.34301000  |
| H           | 4.12262800                                                                               | -0.46819500 | 0.82827600  | H                                   | 3.89394600  | 0.55555600  | 1.01819400  |
| C           | 5.03479700                                                                               | -2.27058300 | 0.09749200  | C                                   | 5.28881900  | -1.01573500 | 0.60410300  |
| H           | 5.70933700                                                                               | -2.38618800 | 0.93954200  | H                                   | 5.82403800  | -0.92459000 | 1.53930200  |
| H           | 5.09344400                                                                               | -2.99042200 | -0.71367900 | H                                   | 5.62861700  | -1.74087800 | -0.12433100 |
| O           | 3.38578500                                                                               | -1.01487600 | -1.08799100 | O                                   | 3.62412100  | -0.26096200 | -0.91761400 |
| C           | 2.11028700                                                                               | -0.29968800 | -0.91936100 | C                                   | 2.18652500  | -0.04607500 | -0.96246100 |
| C           | 1.14028500                                                                               | -1.20844600 | -0.21186600 | C                                   | 1.48691200  | -1.22761800 | -0.36960400 |
| C           | 0.77195000                                                                               | -2.26971900 | 0.33652600  | C                                   | 1.16157600  | -2.33635400 | 0.07241700  |
| C           | 0.45334500                                                                               | -3.56190900 | 0.96031900  | C                                   | 0.94571800  | -3.70493300 | 0.57090200  |
| H           | -0.27851000                                                                              | -4.12618500 | 0.37205900  | H                                   | 0.27734300  | -4.26049100 | -0.08801600 |
| H           | 1.37843300                                                                               | -4.15287100 | 1.00386300  | H                                   | 1.90995200  | -4.21778700 | 0.59426500  |
| H           | 0.08054500                                                                               | -3.44410600 | 1.98357700  | H                                   | 0.53335200  | -3.70094800 | 1.58014200  |
| Au          | -0.99647600                                                                              | -0.54235900 | -0.03243600 | Au                                  | -0.76318100 | -0.80417200 | -0.07127900 |
| P           | -3.12503000                                                                              | 0.57857900  | -0.08824300 | P                                   | -2.82568600 | 0.34414700  | -0.00032300 |
| H           | 1.77567600                                                                               | -0.19173500 | -1.95696000 | H                                   | 1.97588100  | -0.03356100 | -2.03259500 |
| C           | 2.25958300                                                                               | 1.08222300  | -0.28921800 | C                                   | 1.74153300  | 1.27360900  | -0.34995600 |
| C           | 2.78354400                                                                               | 2.11805200  | -1.09283000 | C                                   | 1.78845000  | 2.42464700  | -1.15076000 |
| C           | 2.98294700                                                                               | 3.40117800  | -0.55634700 | C                                   | 1.40826500  | 3.66652500  | -0.62515900 |
| C           | 2.65916100                                                                               | 3.66158700  | 0.79088100  | C                                   | 0.97989400  | 3.76408500  | 0.70756100  |
| C           | 2.13815500                                                                               | 2.63214100  | 1.59735100  | C                                   | 0.93984000  | 2.61684600  | 1.51526800  |
| C           | 1.94105200                                                                               | 1.34591400  | 1.06000700  | C                                   | 1.32163700  | 1.37538500  | 0.98838900  |
| H           | 3.04920300                                                                               | 1.91583400  | -2.12835000 | H                                   | 2.13599900  | 2.35193700  | -2.17526900 |

|                |                                       |                                       |
|----------------|---------------------------------------|---------------------------------------|
|                | H 3.39158200 4.19137800 -1.18008900   | H 1.45543300 4.55245000 -1.24515400   |
|                | H 1.90006200 2.82617800 2.63996300    | H 0.63864300 2.69388200 2.55255700    |
|                | H 1.55412000 0.55231200 1.69623800    | H 1.31814800 0.49625800 1.62675900    |
|                | C -3.31860200 1.66747300 -1.60319000  | C -2.64765500 1.99710100 -0.84131200  |
|                | H -4.29706100 2.15947600 -1.58596800  | H -3.57354700 2.56763100 -0.74497000  |
|                | H -2.53243700 2.42765800 -1.61534500  | H -1.82625400 2.55054400 -0.38340800  |
|                | H -3.23632800 1.06039100 -2.50914800  | H -2.42315100 1.84875400 -1.89762600  |
|                | C -3.40420900 1.70195600 1.38730300   | C -3.39021900 0.72045200 1.73377600   |
|                | H -3.36891300 1.11720900 2.31080400   | H -3.55756000 -0.20689200 2.28091800  |
|                | H -2.62067700 2.46411200 1.42295000   | H -2.62211600 1.29996400 2.24656800   |
|                | H -4.38118700 2.19052700 1.30588800   | H -4.31792900 1.29524500 1.70483900   |
|                | C -4.58168000 -0.60411400 -0.11866600 | C -4.24926300 -0.51765800 -0.83455600 |
|                | H -4.57119200 -1.22886100 0.77894400  | H -4.44712600 -1.46825800 -0.33972100 |
|                | H -5.51968700 -0.03946800 -0.15470300 | H -5.14157900 0.10921700 -0.78354800  |
|                | H -4.51524300 -1.24958200 -0.99904400 | H -4.00223700 -0.70929900 -1.87854600 |
|                | H 2.81825700 4.65274400 1.20713400    | H 0.69856100 4.72604100 1.11677500    |
| Reactant_PhNH2 | <b>Total Energy = -856.4321889</b>    | <b>Total Energy = -856.18551085</b>   |
|                | C -3.84442500 -1.99604000 -0.06738600 | C -4.28950000 -0.30510000 -0.23608500 |
|                | H -3.89546100 -1.15444800 -0.75539100 | H -3.97151300 0.56713700 -0.79588200  |
|                | C -4.55406000 -3.12669900 -0.21863000 | C -5.30858700 -1.09165200 -0.59182100 |
|                | H -5.23058200 -3.23465600 -1.06014800 | H -5.87199300 -0.87627800 -1.48947800 |
|                | H -4.49999600 -3.93329800 0.50669500  | H -5.60888200 -1.92855600 0.02567100  |
|                | O -3.04268400 -1.80512900 1.07495600  | O -3.62327700 -0.51801500 0.98625900  |
|                | C -1.87684500 -0.90033800 0.97132600  | C -2.17907400 -0.32022500 1.02163400  |
|                | C -0.80167300 -1.61040100 0.19460300  | C -1.50771400 -1.46120500 0.32481300  |
|                | C -0.25801700 -2.54503600 -0.43172100 | C -1.16993000 -2.50946300 -0.23756900 |
|                | C 0.26298400 -3.72264300 -1.14207800  | C -0.93707800 -3.81813600 -0.87144300 |
|                | H 1.07894900 -4.19994100 -0.58840600  | H -0.24508200 -4.42004600 -0.28105100 |
|                | H -0.55361800 -4.45131200 -1.23523100 | H -1.89039800 -4.34820600 -0.92886600 |
|                | H 0.61012800 -3.47395400 -2.15076400  | H -0.54282100 -3.70727100 -1.88185700 |
|                | Au 1.18453200 -0.56733100 0.01112800  | Au 0.73825300 -0.95837100 0.03560300  |
|                | P 3.06650500 0.92695300 0.10196600    | P 2.82695200 0.14175700 0.04850500    |
|                | H -1.55381900 -0.84406300 2.01677900  | H -1.95342600 -0.39570900 2.08609700  |
|                | C -2.20061000 0.49200700 0.45957000   | C -1.69702800 1.01919800 0.50042400   |
|                | C -2.79369900 1.41635400 1.35035300   | C -1.55121400 2.09295200 1.39388600   |
|                | C -3.17002400 2.69378800 0.92718900   | C -1.11419000 3.34294300 0.95504800   |
|                | C -2.96931200 3.09472800 -0.42382900  | C -0.81872900 3.55916700 -0.41111000  |
|                | C -2.37114200 2.16837200 -1.32111300  | C -0.97351900 2.48136300 -1.31503900  |
|                | C -2.00093400 0.89116800 -0.88135200  | C -1.40404600 1.23533200 -0.86023600  |
|                | H -2.97635900 1.12465100 2.38294500   | H -1.79223100 1.95328700 2.44223600   |
|                | H -3.62930200 3.38518400 1.62997000   | H -1.01446700 4.15938900 1.66042900   |
|                | H -2.21798300 2.45048800 -2.36063500  | H -0.76973400 2.63199100 -2.36902500  |
|                | H -1.56483700 0.19608300 -1.59701900  | H -1.52807700 0.42756400 -1.57623900  |
|                | C 3.39044900 1.57263400 1.83316000    | C 3.39122000 0.56518000 1.77255800    |
|                | H 4.25567600 2.24432700 1.82604100    | H 4.34551000 1.09393600 1.73138400    |
|                | H 2.51360000 2.11731600 2.19456700    | H 2.64633000 1.20000300 2.25274600    |
|                | H 3.58845000 0.73611400 2.50928200    | H 3.50780600 -0.34632900 2.35833900   |
|                | C 2.83978000 2.44682500 -0.97379000   | C 2.74726900 1.76213600 -0.86587000   |
|                | H 2.72505700 2.14617800 -2.01905300   | H 2.51667700 1.57781300 -1.91533600   |
|                | H 1.94058700 2.98610600 -0.66280300   | H 1.95691100 2.38285300 -0.44185600   |
|                | H 3.71001400 3.10534000 -0.87971800   | H 3.70516700 2.28076300 -0.78902900   |
|                | C 4.67546600 0.13847200 -0.45533200   | C 4.22481900 -0.81755800 -0.72303600  |
|                | H 4.58108200 -0.20761900 -1.48844400  | H 3.98871800 -1.04191300 -1.76315600  |
|                | H 5.49023200 0.86788700 -0.39152700   | H 5.14271800 -0.22801600 -0.68012600  |
|                | H 4.90748600 -0.71788300 0.18417600   | H 4.37147100 -1.75362600 -0.18474900  |

|                |                                                                                                                                                                                                                                                                                                                                                                                                                                                                                                                                                                                                                                                                                                                                                                                                                                                                                                                                                                                                                                                                                                                                                                                                                                                                                                                                                                                                                                                                                                                                                                                                                                                                                                                            |                                                                                                                                                                                                                                                                                                                                                                                                                                                                                                                                                                                                                                                                                                                                                                                                                                                                                                                                                                                                                                                                                                                                                                                                                                                                                                                                                                                                                                                                                                                                                                                                                                                                                                                             |
|----------------|----------------------------------------------------------------------------------------------------------------------------------------------------------------------------------------------------------------------------------------------------------------------------------------------------------------------------------------------------------------------------------------------------------------------------------------------------------------------------------------------------------------------------------------------------------------------------------------------------------------------------------------------------------------------------------------------------------------------------------------------------------------------------------------------------------------------------------------------------------------------------------------------------------------------------------------------------------------------------------------------------------------------------------------------------------------------------------------------------------------------------------------------------------------------------------------------------------------------------------------------------------------------------------------------------------------------------------------------------------------------------------------------------------------------------------------------------------------------------------------------------------------------------------------------------------------------------------------------------------------------------------------------------------------------------------------------------------------------------|-----------------------------------------------------------------------------------------------------------------------------------------------------------------------------------------------------------------------------------------------------------------------------------------------------------------------------------------------------------------------------------------------------------------------------------------------------------------------------------------------------------------------------------------------------------------------------------------------------------------------------------------------------------------------------------------------------------------------------------------------------------------------------------------------------------------------------------------------------------------------------------------------------------------------------------------------------------------------------------------------------------------------------------------------------------------------------------------------------------------------------------------------------------------------------------------------------------------------------------------------------------------------------------------------------------------------------------------------------------------------------------------------------------------------------------------------------------------------------------------------------------------------------------------------------------------------------------------------------------------------------------------------------------------------------------------------------------------------------|
|                | N -3.34588100 4.35743800 -0.85046900<br>H -3.25295200 4.63074500 -1.81782400<br>H -3.80695400 5.00140400 -0.22431100                                                                                                                                                                                                                                                                                                                                                                                                                                                                                                                                                                                                                                                                                                                                                                                                                                                                                                                                                                                                                                                                                                                                                                                                                                                                                                                                                                                                                                                                                                                                                                                                       | N -0.37526800 4.79144500 -0.85269800<br>H -0.25427100 4.97464100 -1.83517300<br>H -0.32775500 5.57592200 -0.22342200                                                                                                                                                                                                                                                                                                                                                                                                                                                                                                                                                                                                                                                                                                                                                                                                                                                                                                                                                                                                                                                                                                                                                                                                                                                                                                                                                                                                                                                                                                                                                                                                        |
| Reactant_PhNO2 | <b>Total Energy = -1005.536344</b><br>C 2.37540300 3.54991900 -0.03224000<br>H 2.78587000 2.82836300 -0.73665300<br>C 2.52134900 4.87880000 -0.15270300<br>H 3.08375600 5.29011700 -0.98459100<br>H 2.12321600 5.56385300 0.59015500<br>O 1.73764900 3.00639400 1.10651400<br>C 1.05564500 1.71458800 0.96550200<br>C -0.15275600 1.88298100 0.08326000<br>C -0.91959700 2.54024700 -0.65423800<br>C -1.75817600 3.39013700 -1.50975600<br>H -2.72670100 3.60347600 -1.04462500<br>H -1.23502500 4.34577100 -1.65217200<br>H -1.92070200 2.94543300 -2.49764300<br>Au -1.65776000 0.22122400 -0.01333100<br>P -2.96521500 -1.79243500 0.17420800<br>H 0.70809300 1.52678600 1.98738500<br>C 1.99952200 0.58765300 0.54319800<br>C 2.95537200 0.14919200 1.48617000<br>C 3.86198600 -0.86989900 1.16306500<br>C 3.79568800 -1.44266900 -0.11873100<br>C 2.86692700 -1.01917000 -1.08121400<br>C 1.96792300 0.00418800 -0.74058600<br>H 2.99653600 0.61324400 2.46819100<br>H 4.60350300 -1.22082400 1.87209400<br>H 2.86439900 -1.48089200 -2.06234300<br>H 1.25110400 0.34921600 -1.48091100<br>C -2.93034400 -2.51347900 1.90548400<br>H -3.54360900 -3.42031400 1.94287000<br>H -1.90260600 -2.76315600 2.18390300<br>H -3.32248900 -1.78374100 2.61945100<br>C -2.36648900 -3.15546500 -0.96609100<br>H -2.42296700 -2.82083000 -2.00570700<br>H -1.32749000 -3.40424300 -0.73226800<br>H -2.98830700 -4.04825400 -0.83964200<br>C -4.77708200 -1.52978300 -0.23563800<br>H -4.87838900 -1.17452400 -1.26493200<br>H -5.32298400 -2.47292600 -0.12416000<br>H -5.20524600 -0.78403400 0.44007400<br>N 4.73724800 -2.53456900 -0.46862800<br>O 4.63684200 -3.05562900 -1.63094600<br>O 5.58655200 -2.89378100 0.41306900 | <b>Total Energy = -1005.25417681</b><br>C 2.06279300 3.76025500 -0.28101800<br>H 2.52100700 2.98517000 -0.88579800<br>C 2.04538900 5.05456400 -0.60598400<br>H 2.50929400 5.39014200 -1.52340000<br>H 1.60532900 5.78892000 0.05665200<br>O 1.54916800 3.33966100 0.96650100<br>C 0.85077000 2.06651100 1.00579400<br>C -0.42216900 2.16515300 0.22929900<br>C -1.40006900 2.58517900 -0.40215500<br>C -2.50056500 3.22759900 -1.13750600<br>H -3.43074500 3.18196400 -0.56997100<br>H -2.24134000 4.27834600 -1.28852700<br>H -2.65066600 2.76770200 -2.11472900<br>Au -1.54220100 0.15507300 0.03532800<br>P -2.18255100 -2.12247000 0.11359700<br>H 0.59914300 1.95522400 2.06134400<br>C 1.72232000 0.89592400 0.57396500<br>C 2.62475200 0.36805700 1.51032000<br>C 3.45039700 -0.70756600 1.16977200<br>C 3.34679500 -1.23615900 -0.11920700<br>C 2.48111900 -0.71496500 -1.08321800<br>C 1.66615800 0.36279700 -0.72526600<br>H 2.68791200 0.80255500 2.50074700<br>H 4.15377900 -1.13247800 1.87221100<br>H 2.46282700 -1.14074100 -2.07654300<br>H 1.00357400 0.79837300 -1.46537600<br>C -2.18220600 -2.80346300 1.84692800<br>H -2.46530700 -3.85770800 1.82918600<br>H -1.18687200 -2.70561800 2.28010600<br>H -2.89100100 -2.25012800 2.46252700<br>C -1.01887300 -3.20151200 -0.86127300<br>H -1.02928300 -2.90373200 -1.90981300<br>H -0.00463100 -3.09347400 -0.47594700<br>H -1.32600100 -4.24598300 -0.78067400<br>C -3.88426500 -2.44774200 -0.56996300<br>H -3.93212200 -2.12747000 -1.61051600<br>H -4.10520100 -3.51523300 -0.51161300<br>H -4.62626000 -1.89456400 0.00529900<br>N 4.18477800 -2.39280600 -0.48190400<br>O 4.00897900 -2.90568800 -1.62176200<br>O 5.01325300 -2.80811800 0.37030700 |
| Product_Ph     | <b>Total Energy = -801.1171399</b><br>C -3.52259600 2.50767100 -0.83341900<br>H -4.38242100 3.18354900 -0.99446700<br>C -2.62494400 2.89493000 0.32838000<br>H -3.22978100 2.74907600 1.24270300<br>H -2.49057100 3.98630300 0.26695400<br>O -3.37375100 1.52065100 -1.57846600<br>C -1.64491600 0.04572800 -0.77357400<br>C -0.93921700 1.03666400 -0.05276100                                                                                                                                                                                                                                                                                                                                                                                                                                                                                                                                                                                                                                                                                                                                                                                                                                                                                                                                                                                                                                                                                                                                                                                                                                                                                                                                                            |                                                                                                                                                                                                                                                                                                                                                                                                                                                                                                                                                                                                                                                                                                                                                                                                                                                                                                                                                                                                                                                                                                                                                                                                                                                                                                                                                                                                                                                                                                                                                                                                                                                                                                                             |

|               |                                   |             |             |             |
|---------------|-----------------------------------|-------------|-------------|-------------|
|               | C                                 | -1.26037000 | 2.22911700  | 0.49833300  |
|               | C                                 | -0.28679500 | 3.06273200  | 1.31133300  |
|               | H                                 | 0.62657000  | 2.50592900  | 1.54304500  |
|               | H                                 | -0.00142500 | 3.97497100  | 0.76729100  |
|               | H                                 | -0.74377700 | 3.38426000  | 2.25815200  |
|               | Au                                | 1.01718600  | 0.21003700  | -0.06102700 |
|               | P                                 | 3.29842600  | -0.66097000 | -0.04133400 |
|               | H                                 | -1.43245300 | -0.04115600 | -1.83989800 |
|               | C                                 | -2.48394500 | -0.99637200 | -0.20862400 |
|               | C                                 | -3.08418200 | -1.93777400 | -1.09010200 |
|               | C                                 | -3.94849300 | -2.92185800 | -0.59280800 |
|               | C                                 | -4.21545400 | -2.98425300 | 0.79096300  |
|               | C                                 | -3.61681400 | -2.06075300 | 1.67874400  |
|               | C                                 | -2.75591800 | -1.07431500 | 1.18617400  |
|               | H                                 | -2.88439200 | -1.87488700 | -2.15755500 |
|               | H                                 | -4.41367200 | -3.63343600 | -1.26833600 |
|               | H                                 | -3.82359300 | -2.12444500 | 2.74320800  |
|               | H                                 | -2.27645800 | -0.37335700 | 1.86432800  |
|               | C                                 | 3.50405100  | -2.25793100 | -1.00998000 |
|               | H                                 | 3.22801200  | -2.09354700 | -2.05562300 |
|               | H                                 | 4.54419900  | -2.59836700 | -0.96013900 |
|               | H                                 | 2.85110400  | -3.02930300 | -0.59146100 |
|               | C                                 | 3.95003000  | -1.05499300 | 1.67613800  |
|               | H                                 | 3.30478100  | -1.79775300 | 2.15412200  |
|               | H                                 | 4.96963800  | -1.45036000 | 1.61133700  |
|               | H                                 | 3.95363700  | -0.14829900 | 2.28821900  |
|               | C                                 | 4.56371300  | 0.51633000  | -0.77716400 |
|               | H                                 | 4.56826800  | 1.45316100  | -0.21230100 |
|               | H                                 | 5.56302400  | 0.06882600  | -0.74225200 |
|               | H                                 | 4.30279100  | 0.73587900  | -1.81656000 |
|               | H                                 | -4.88241700 | -3.75013300 | 1.17828500  |
| Product_PhNH2 | <b>Total Energy =-856.4862384</b> |             |             |             |
|               | C                                 | -2.64498500 | 3.12611300  | -0.97622700 |
|               | H                                 | -3.30726200 | 3.99610900  | -1.14549400 |
|               | C                                 | -2.05338600 | 3.04757400  | 0.42691400  |
|               | H                                 | -2.87169300 | 2.67371200  | 1.06994700  |
|               | H                                 | -1.88594400 | 4.08047400  | 0.76105600  |
|               | O                                 | -2.46340600 | 2.29986400  | -1.88721400 |
|               | C                                 | -1.40409100 | 0.24909400  | -0.80088600 |
|               | C                                 | -0.53796000 | 1.04268800  | 0.01376700  |
|               | C                                 | -0.78201200 | 2.22370900  | 0.64583900  |
|               | C                                 | 0.21552200  | 2.89130300  | 1.57421500  |
|               | H                                 | 1.05266300  | 2.22750500  | 1.81140700  |
|               | H                                 | 0.62413100  | 3.80736800  | 1.12194700  |
|               | H                                 | -0.26868100 | 3.18985700  | 2.51553200  |
|               | Au                                | 1.34078000  | 0.10119600  | 0.00268100  |
|               | P                                 | 3.54367300  | -0.96187400 | -0.04397800 |
|               | H                                 | -1.10293700 | 0.10467600  | -1.83860200 |
|               | C                                 | -2.54425100 | -0.48795800 | -0.36956300 |
|               | C                                 | -3.31089000 | -1.22414100 | -1.33170500 |
|               | C                                 | -4.46022500 | -1.90814500 | -0.97133900 |
|               | C                                 | -4.89730800 | -1.90604000 | 0.39159700  |
|               | C                                 | -4.12677800 | -1.19390200 | 1.36961200  |
|               | C                                 | -2.98479600 | -0.50724200 | 0.99468300  |
|               | H                                 | -2.99120400 | -1.22201200 | -2.37143400 |



|               |                                       |  |
|---------------|---------------------------------------|--|
|               | H -5.03772800 -2.44829600 -1.71715600 |  |
|               | H -4.44300600 -1.21183700 2.40984800  |  |
|               | H -2.38964500 0.00557300 1.74566700   |  |
|               | C 3.57929300 -2.60593200 -0.95476200  |  |
|               | H 3.25589000 -2.45873400 -1.98946900  |  |
|               | H 4.59225400 -3.02340100 -0.94931800  |  |
|               | H 2.89582900 -3.30999200 -0.47101000  |  |
|               | C 4.25765000 -1.34678600 1.65171400   |  |
|               | H 3.58179300 -2.01546000 2.19287000   |  |
|               | H 5.23792200 -1.82579400 1.55242200   |  |
|               | H 4.36586400 -0.42108000 2.22470900   |  |
|               | C 4.86903600 0.07006500 -0.88740000   |  |
|               | H 4.98365800 1.02293200 -0.36217200   |  |
|               | H 5.82671100 -0.46206700 -0.88361200  |  |
|               | H 4.57349000 0.27518300 -1.92054100   |  |
|               | N -6.02696800 -2.58351100 0.76082800  |  |
|               | H -6.34578000 -2.59106700 1.72066800  |  |
|               | H -6.57593700 -3.09676100 0.08378700  |  |
| Product_PhNO2 | <b>Total Energy = -1005.575049</b>    |  |
|               | C -1.66635800 4.06801700 -0.55494200  |  |
|               | H -2.25195200 5.00539800 -0.57953100  |  |
|               | C -0.59958100 4.02939900 0.52534600   |  |
|               | H -1.12497300 4.17401800 1.48640700   |  |
|               | H -0.01094300 4.95448600 0.40360200   |  |
|               | O -1.92059800 3.16785300 -1.37777900  |  |
|               | C -0.74280400 1.08958600 -0.89671000  |  |
|               | C 0.17185600 1.68839700 -0.02290700   |  |
|               | C 0.35864100 2.84559300 0.63860100    |  |
|               | C 1.54221300 3.11171000 1.54987400    |  |
|               | H 2.15357700 2.21568200 1.69488100    |  |
|               | H 2.18522000 3.90007000 1.13309000    |  |
|               | H 1.20526100 3.46059000 2.53611700    |  |
|               | Au 1.56003100 0.04750700 -0.07327800  |  |
|               | P 3.24865300 -1.71300800 -0.01589500  |  |
|               | H -0.52119100 1.12904400 -1.96429300  |  |
|               | C -1.90927300 0.28733900 -0.51667000  |  |
|               | C -2.71680000 -0.25773700 -1.54714300 |  |
|               | C -3.87342600 -0.98497100 -1.23742000 |  |
|               | C -4.20316800 -1.16284500 0.11590200  |  |
|               | C -3.42404600 -0.63710800 1.16424600  |  |
|               | C -2.27423000 0.08865700 0.84087400   |  |
|               | H -2.44632000 -0.09460500 -2.58724000 |  |
|               | H -4.51082800 -1.40611200 -2.00655400 |  |
|               | H -3.72733700 -0.80656600 2.19126700  |  |
|               | H -1.64951600 0.49546200 1.63074500   |  |
|               | C 2.91287300 -3.10563800 -1.23068100  |  |
|               | H 2.88024900 -2.70834500 -2.24923500  |  |
|               | H 3.70355100 -3.86097200 -1.16356800  |  |
|               | H 1.94966800 -3.57100700 -1.00277200  |  |
|               | C 3.40542700 -2.54631900 1.65930600   |  |
|               | H 2.44638200 -2.98944900 1.94252400   |  |
|               | H 4.16815600 -3.33160000 1.61943700   |  |
|               | H 3.68805200 -1.80854700 2.41583900   |  |
|               | C 4.97561000 -1.10365800 -0.42981700  |  |
|               | H 5.27964200 -0.33494800 0.28657000   |  |

|          |                                                                                                                                                                                                                                                                                                                                                                                                                                                                                                                                                                                                                                                                                                                                                                                                                                                                                                                                                                                                                                                                                                                                                                                                                                                                                                                                                                                                                                                                                                                                                                                                                                                                             |                                                                                                                                                                                                                                                                                                                                                                                                                                                                                                                                                                                                                                                                                                                                                                                                                                                                                                                                                                                                                                                                                                                                                                                                                                                                                                                                                                                                                                                                                                                                                                                                                                                                              |
|----------|-----------------------------------------------------------------------------------------------------------------------------------------------------------------------------------------------------------------------------------------------------------------------------------------------------------------------------------------------------------------------------------------------------------------------------------------------------------------------------------------------------------------------------------------------------------------------------------------------------------------------------------------------------------------------------------------------------------------------------------------------------------------------------------------------------------------------------------------------------------------------------------------------------------------------------------------------------------------------------------------------------------------------------------------------------------------------------------------------------------------------------------------------------------------------------------------------------------------------------------------------------------------------------------------------------------------------------------------------------------------------------------------------------------------------------------------------------------------------------------------------------------------------------------------------------------------------------------------------------------------------------------------------------------------------------|------------------------------------------------------------------------------------------------------------------------------------------------------------------------------------------------------------------------------------------------------------------------------------------------------------------------------------------------------------------------------------------------------------------------------------------------------------------------------------------------------------------------------------------------------------------------------------------------------------------------------------------------------------------------------------------------------------------------------------------------------------------------------------------------------------------------------------------------------------------------------------------------------------------------------------------------------------------------------------------------------------------------------------------------------------------------------------------------------------------------------------------------------------------------------------------------------------------------------------------------------------------------------------------------------------------------------------------------------------------------------------------------------------------------------------------------------------------------------------------------------------------------------------------------------------------------------------------------------------------------------------------------------------------------------|
|          | H 5.68785500 -1.93495400 -0.39016000<br>H 4.98322600 -0.67006600 -1.43401800<br>N -5.42127800 -1.94325700 0.45841700<br>O -6.11284600 -2.41520100 -0.50396900<br>O -5.69813800 -2.09455800 1.69527300                                                                                                                                                                                                                                                                                                                                                                                                                                                                                                                                                                                                                                                                                                                                                                                                                                                                                                                                                                                                                                                                                                                                                                                                                                                                                                                                                                                                                                                                       |                                                                                                                                                                                                                                                                                                                                                                                                                                                                                                                                                                                                                                                                                                                                                                                                                                                                                                                                                                                                                                                                                                                                                                                                                                                                                                                                                                                                                                                                                                                                                                                                                                                                              |
| TS_Ph    | <b>Total Energy = -801.0648663, Frequency = -202.7327 cm<sup>-1</sup></b><br>C 3.60487300 -1.91712500 -0.25912900<br>H 4.18256900 -1.44137600 0.53525900<br>C 3.18995400 -3.22350000 -0.20359400<br>H 3.52651000 -3.87379100 0.59949100<br>H 2.71007200 -3.67854000 -1.06586700<br>O 3.18062200 -1.13648200 -1.29345200<br>C 1.97043900 -0.24282400 -0.96038500<br>C 1.01626100 -1.09748200 -0.16517200<br>C 1.20208200 -2.22511700 0.44782800<br>C 0.74134500 -3.29213200 1.37220400<br>H -0.25876500 -3.03735800 1.74533400<br>H 0.68728800 -4.26801400 0.87822800<br>H 1.40517800 -3.37784700 2.24042300<br>Au -0.96747000 -0.35267900 -0.05847400<br>P -3.18496500 0.61310500 -0.04213700<br>H 1.58383800 -0.04020500 -1.96231100<br>C 2.42437700 1.04466600 -0.29390400<br>C 2.91820200 2.07970600 -1.11841000<br>C 3.40347600 3.27003100 -0.55104600<br>C 3.39696300 3.43743100 0.84814700<br>C 2.90114100 2.41080500 1.67483300<br>C 2.41592200 1.21868600 1.10702600<br>H 2.93613100 1.94877600 -2.19857400<br>H 3.78536200 4.05984300 -1.19200200<br>H 3.77267200 4.35743300 1.28798300<br>H 2.89263400 2.53977100 2.75395800<br>H 2.02291300 0.43739900 1.75293100<br>C -3.68333700 1.33257700 1.61882400<br>H -3.67563300 0.54715100 2.38007400<br>H -2.97299000 2.11122700 1.91116200<br>H -4.68804500 1.76454900 1.55590400<br>C -4.54837900 -0.60016000 -0.48265200<br>H -4.56570000 -1.41705400 0.24458100<br>H -5.51913400 -0.09256200 -0.47859700<br>H -4.36391700 -1.01829000 -1.47639800<br>C -3.36911600 2.02500800 -1.26546500<br>H -4.38333400 2.43624700 -1.21754600<br>H -2.64838400 2.81343400 -1.03044800<br>H -3.17489000 1.66269300 -2.27911800 | <b>Total Energy = -800.82148920, Frequency = -255.0172 cm<sup>-1</sup></b><br>C 3.64843700 -1.77094700 -0.18576900<br>H 4.16048900 -1.20252600 0.58497400<br>C 3.34751100 -3.09217400 -0.08526500<br>H 3.70459500 -3.67462500 0.75512200<br>H 2.91163200 -3.60884000 -0.93278400<br>O 3.19080100 -1.07693900 -1.27638600<br>C 1.97338400 -0.23908000 -0.99520800<br>C 1.03639300 -1.09940000 -0.19945600<br>C 1.21843600 -2.17897300 0.46326400<br>C 0.84068900 -3.26891300 1.38845400<br>H -0.18507200 -3.10238800 1.72904000<br>H 0.89160700 -4.24231600 0.90038600<br>H 1.49001200 -3.27523600 2.26537200<br>Au -0.96378100 -0.37880000 -0.07533500<br>P -3.14567300 0.57619800 -0.05099000<br>H 1.58852800 -0.04721800 -1.99491300<br>C 2.36284300 1.05436100 -0.30795600<br>C 3.02564200 2.02467400 -1.07838200<br>C 3.45350100 3.21898200 -0.48967500<br>C 3.21949400 3.45146800 0.87516000<br>C 2.55945900 2.48533300 1.64617200<br>C 2.13239900 1.28663000 1.05655800<br>H 3.21800000 1.83590200 -2.12875700<br>H 3.96720300 3.96197300 -1.08568300<br>H 3.55073000 4.37554000 1.33138300<br>H 2.38212900 2.66241000 2.69937000<br>H 1.62261500 0.54258500 1.65837700<br>C -3.63283600 1.30401600 1.59484700<br>H -3.62467400 0.52785200 2.35998100<br>H -2.92426400 2.08282700 1.87636900<br>H -4.63427800 1.73367300 1.52712100<br>C -4.50864600 -0.62257200 -0.47659500<br>H -4.52691000 -1.43480800 0.24989000<br>H -5.47076000 -0.10661600 -0.46592800<br>H -4.33509600 -1.04136700 -1.46780100<br>C -3.32746400 1.97346600 -1.27147200<br>H -4.33664300 2.38636700 -1.21539700<br>H -2.60379800 2.75646300 -1.04533500<br>H -3.14410400 1.60686500 -2.28144100 |
| TS_PhNH2 | <b>Total Energy = -856.4227526, Frequency = -204.7950 cm<sup>-1</sup></b><br>C -2.92321200 2.78051400 -0.28039600<br>H -3.63068200 2.35519700 0.43398100<br>C -2.27192000 3.96816300 -0.06478600<br>H -2.53255900 4.59322000 0.78533300<br>H -1.64915100 4.39634700 -0.84560000<br>O -2.58616800 2.02976600 -1.36486400                                                                                                                                                                                                                                                                                                                                                                                                                                                                                                                                                                                                                                                                                                                                                                                                                                                                                                                                                                                                                                                                                                                                                                                                                                                                                                                                                     | <b>Total Energy = -856.17259521, Frequency = -260.8318 cm<sup>-1</sup></b><br>C -3.03638600 2.63617000 -0.18671700<br>H -3.68942000 2.11015600 0.50370400<br>C -2.49110700 3.85565300 0.06246600<br>H -2.77452400 4.41572700 0.94520300<br>H -1.91413200 4.35146700 -0.70986500<br>O -2.66137800 1.97083500 -1.32321900                                                                                                                                                                                                                                                                                                                                                                                                                                                                                                                                                                                                                                                                                                                                                                                                                                                                                                                                                                                                                                                                                                                                                                                                                                                                                                                                                      |

|          |                                                                           |                                                                             |
|----------|---------------------------------------------------------------------------|-----------------------------------------------------------------------------|
|          | C -1.63551300 0.84466300 -1.03466800                                      | C -1.66074000 0.86579000 -1.07385700                                        |
|          | C -0.56957100 1.42351600 -0.13588700                                      | C -0.61036200 1.45492500 -0.17636200                                        |
|          | C -0.54607200 2.50687900 0.57372100                                       | C -0.60146000 2.48379500 0.58300200                                         |
|          | C 0.06621300 3.38122700 1.60492000                                        | C -0.06235900 3.39161500 1.61772300                                         |
|          | H 0.96722800 2.89538900 2.00098100                                        | H 0.89445500 2.99641100 1.97038300                                          |
|          | H 0.34977200 4.35798300 1.19890300                                        | H 0.09953400 4.39493100 1.22343200                                          |
|          | H -0.61886200 3.53980100 2.44583300                                       | H -0.73881300 3.44936000 2.47190400                                         |
|          | Au 1.21164700 0.27657900 -0.03577000                                      | Au 1.18862900 0.32474000 -0.05442600                                        |
|          | P 3.18138700 -1.12654800 -0.04002000                                      | P 3.12238900 -1.06427700 -0.04851500                                        |
|          | H -1.24496500 0.63074700 -2.03261600                                      | H -1.27575500 0.68431800 -2.07548300                                        |
|          | C -2.39320200 -0.33740500 -0.48517300                                     | C -2.32352200 -0.36531400 -0.50951800                                       |
|          | C -3.04951300 -1.20182800 -1.39334200                                     | C -3.08006100 -1.17351300 -1.37807700                                       |
|          | C -3.82383300 -2.27460600 -0.94538200                                     | C -3.76492600 -2.29010000 -0.90827800                                       |
|          | C -3.97094700 -2.52403900 0.44796500                                      | C -3.71345100 -2.63692600 0.46356400                                        |
|          | C -3.30562500 -1.66216200 1.36317600                                      | C -2.95077400 -1.82785100 1.33635900                                        |
|          | C -2.53520000 -0.59052400 0.89858800                                      | C -2.27120000 -0.70939800 0.85134100                                        |
|          | H -2.96375200 -1.02159900 -2.46349100                                     | H -3.14420900 -0.91357500 -2.42933600                                       |
|          | H -4.32239500 -2.92226600 -1.66289900                                     | H -4.34633600 -2.89723000 -1.59201400                                       |
|          | H -3.39875300 -1.84143500 2.43216300                                      | H -2.89920200 -2.07890100 2.38946300                                        |
|          | H -2.03011600 0.04524500 1.62229500                                       | H -1.69283400 -0.10453200 1.54166700                                        |
|          | C 3.15916200 -2.40997200 -1.40993500                                      | C 3.10400400 -2.32368100 -1.42321600                                        |
|          | H 3.10217300 -1.91176400 -2.38205800                                      | H 3.06172600 -1.81623400 -2.38692600                                        |
|          | H 4.06780300 -3.02048400 -1.36949600                                      | H 4.00575300 -2.93745600 -1.37741400                                        |
|          | H 2.28390800 -3.05582700 -1.29501800                                      | H 2.22600200 -2.96191000 -1.32411900                                        |
|          | C 3.41604000 -2.10673900 1.54405900                                       | C 3.32917500 -2.05848100 1.51507300                                         |
|          | H 2.54499600 -2.74646800 1.71270000                                       | H 2.45663100 -2.69502400 1.66169100                                         |
|          | H 4.31442200 -2.72958100 1.47280300                                       | H 4.22349100 -2.68078400 1.44446700                                         |
|          | H 3.51752400 -1.42234700 2.39127200                                       | H 3.42247300 -1.38826700 2.36948300                                         |
|          | C 4.78758800 -0.18348500 -0.27737000                                      | C 4.72820500 -0.13992200 -0.25575400                                        |
|          | H 4.91855800 0.53435400 0.53754600                                        | H 4.85643700 0.56600400 0.56469300                                          |
|          | H 5.63513000 -0.87752900 -0.28700900                                      | H 5.56330000 -0.84316000 -0.26108900                                        |
|          | H 4.75754900 0.36263000 -1.22463800                                       | H 4.71576500 0.41239500 -1.19529400                                         |
|          | N -4.73733000 -3.58448800 0.90005800                                      | N -4.39190500 -3.74312900 0.93480000                                        |
|          | H -4.86099100 -3.75640500 1.88702600                                      | H -4.37582600 -3.98481100 1.91120400                                        |
|          | H -5.22351100 -4.18861400 0.25369200                                      | H -4.94790500 -4.31051500 0.31728800                                        |
| TS_PhNO2 | <b>Total Energy = -1005.526999, Frequency = -206.8975 cm<sup>-1</sup></b> | <b>Total Energy = -1005.24325702, Frequency = -249.6983 cm<sup>-1</sup></b> |
|          | C -1.56622700 3.74202400 -0.14663500                                      | C -1.68415800 3.64066700 -0.07269100                                        |
|          | H -2.37715800 3.57099800 0.56347900                                       | H -2.49332400 3.35742900 0.59377300                                         |
|          | C -0.54606700 4.63091600 0.08029100                                       | C -0.75511700 4.58897400 0.21533200                                         |
|          | H -0.57145600 5.28365200 0.94875700                                       | H -0.84049900 5.18548500 1.11530300                                         |
|          | H 0.16892200 4.85412800 -0.70705100                                       | H -0.03409700 4.88105900 -0.53964400                                        |
|          | O -1.51914500 2.95465300 -1.26142700                                      | O -1.54939300 2.92420700 -1.23723100                                        |
|          | C -0.91160600 1.56088100 -1.04631500                                      | C -0.93774400 1.56615300 -1.05837700                                        |
|          | C 0.24963800 1.71833300 -0.10226100                                       | C 0.20830700 1.71580800 -0.10456000                                         |
|          | C 0.58338300 2.71535400 0.65870000                                        | C 0.51987300 2.65320900 0.71042300                                          |
|          | C 1.41935300 3.29018200 1.74344600                                        | C 1.28803000 3.27314200 1.81117800                                          |
|          | H 2.10459100 2.51826200 2.11604700                                        | H 2.03397700 2.55707300 2.16732800                                          |
|          | H 2.01381400 4.14171400 1.39591200                                        | H 1.80116500 4.17660900 1.48156600                                          |
|          | H 0.80230700 3.61802300 2.58812700                                        | H 0.63331300 3.52007300 2.64848400                                          |
|          | Au 1.58201200 0.06437700 -0.03505200                                      | Au 1.58762600 0.08891200 -0.04694800                                        |
|          | P 3.01213900 -1.88760900 -0.06238500                                      | P 3.01827500 -1.81557400 -0.09695800                                        |
|          | H -0.57290900 1.31799600 -2.05676600                                      | H -0.59209800 1.32762400 -2.06260000                                        |
|          | C -2.00122300 0.59186200 -0.60637100                                      | C -1.99966200 0.57745900 -0.61009500                                        |
|          | C -2.87023900 0.07909600 -1.59469200                                      | C -3.02057000 0.26884100 -1.52571200                                        |

|   |             |             |             |   |             |             |             |
|---|-------------|-------------|-------------|---|-------------|-------------|-------------|
| C | -3.92322100 | -0.77855700 | -1.24588600 | C | -4.04447000 | -0.61209400 | -1.17310300 |
| C | -4.09016000 | -1.11439900 | 0.10789100  | C | -4.02066100 | -1.17116400 | 0.10812300  |
| C | -3.24466200 | -0.61941900 | 1.11319600  | C | -3.02730800 | -0.87764500 | 1.04207000  |
| C | -2.19573300 | 0.23718300  | 0.74591300  | C | -2.00961900 | 0.00882700  | 0.67211400  |
| H | -2.73141300 | 0.35924900  | -2.63589500 | H | -3.01755600 | 0.72781200  | -2.50687400 |
| H | -4.60224600 | -1.18234700 | -1.98853100 | H | -4.84164400 | -0.86732800 | -1.85702800 |
| H | -3.41386000 | -0.90758500 | 2.14472300  | H | -3.06150100 | -1.33272900 | 2.02187500  |
| H | -1.52545800 | 0.61576800  | 1.51192000  | H | -1.22948200 | 0.25192700  | 1.38267900  |
| C | 2.33849400  | -3.26449700 | -1.14532400 | C | 2.31441700  | -3.21691300 | -1.10441100 |
| H | 2.23615500  | -2.90935800 | -2.17478300 | H | 2.16408300  | -2.89246700 | -2.13398000 |
| H | 3.01753800  | -4.12381100 | -1.12628400 | H | 3.00249800  | -4.06437800 | -1.09059300 |
| H | 1.35497600  | -3.57418100 | -0.78067100 | H | 1.35500100  | -3.52489800 | -0.68917400 |
| C | 3.25679900  | -2.66327700 | 1.62944300  | C | 3.35233900  | -2.54254700 | 1.58678500  |
| H | 2.28808700  | -2.95501300 | 2.04512400  | H | 2.41300200  | -2.83930900 | 2.05305900  |
| H | 3.89581300  | -3.54925300 | 1.54789500  | H | 3.99856100  | -3.41727900 | 1.49075900  |
| H | 3.72655300  | -1.94189200 | 2.30427100  | H | 3.84164600  | -1.80232000 | 2.21966300  |
| C | 4.74084100  | -1.54768300 | -0.71027000 | C | 4.69839300  | -1.47889200 | -0.83066300 |
| H | 5.23412700  | -0.80370300 | -0.07819300 | H | 5.21220600  | -0.71599300 | -0.24606200 |
| H | 5.33059200  | -2.47081500 | -0.70889400 | H | 5.29164600  | -2.39538900 | -0.82945700 |
| H | 4.68290600  | -1.15859700 | -1.73089100 | H | 4.58888700  | -1.12215600 | -1.85467600 |
| N | -5.19345700 | -2.02990900 | 0.48998700  | N | -5.08888800 | -2.11124000 | 0.48976400  |
| O | -5.31857400 | -2.32644200 | 1.72616000  | O | -5.04115300 | -2.61374900 | 1.64564500  |
| O | -5.95040100 | -2.46990200 | -0.43848800 | O | -5.98351300 | -2.35865400 | -0.36190900 |

|             | <b>Cation-Accelerated-Oxonia Claisen ( gold(I)-coordinated to oxygen) at B3LYP/LANL2DZ level</b> |             |             |  |
|-------------|--------------------------------------------------------------------------------------------------|-------------|-------------|--|
| Reactant_Ph | <b>Total Energy = -801.08155997</b>                                                              |             |             |  |
| C           | 1.39493200                                                                                       | 0.50996200  | 1.86977000  |  |
| H           | 2.41363700                                                                                       | 0.16215500  | 2.00492700  |  |
| C           | 0.64244000                                                                                       | 1.06154000  | 2.82997800  |  |
| H           | 1.04640100                                                                                       | 1.16753300  | 3.83135000  |  |
| H           | -0.37195800                                                                                      | 1.41288200  | 2.65544500  |  |
| O           | 0.89846500                                                                                       | 0.27327600  | 0.55525500  |  |
| C           | 1.93287000                                                                                       | 0.39644400  | -0.63299200 |  |
| C           | 2.34464000                                                                                       | 1.78739600  | -0.73534500 |  |
| C           | 2.66865100                                                                                       | 2.96231500  | -0.83831800 |  |
| C           | 3.07405300                                                                                       | 4.36810200  | -0.96941800 |  |
| H           | 1.27458300                                                                                       | 0.11220500  | -1.46174400 |  |
| C           | 3.02365200                                                                                       | -0.63613700 | -0.44320200 |  |
| C           | 2.71652600                                                                                       | -1.99392100 | -0.68698900 |  |
| C           | 3.69385000                                                                                       | -2.98569500 | -0.50918400 |  |
| C           | 4.99124200                                                                                       | -2.62696700 | -0.08942800 |  |
| C           | 5.30468300                                                                                       | -1.27475400 | 0.14703700  |  |
| C           | 4.32513000                                                                                       | -0.28090700 | -0.02957500 |  |
| H           | 1.71754900                                                                                       | -2.27397300 | -1.01750000 |  |
| H           | 3.45372900                                                                                       | -4.02758300 | -0.70212300 |  |
| H           | 6.30715300                                                                                       | -0.99674400 | 0.46055700  |  |
| H           | 4.57389500                                                                                       | 0.76434000  | 0.13318700  |  |
| H           | 5.75086700                                                                                       | -3.39273000 | 0.04317700  |  |
| H           | 2.35812900                                                                                       | 4.93090700  | -1.57991200 |  |
| H           | 3.13571800                                                                                       | 4.84828000  | 0.01488900  |  |
| H           | 4.06019900                                                                                       | 4.44457300  | -1.44355500 |  |
| Au          | -1.18494200                                                                                      | 0.00361400  | 0.14757400  |  |

|                |                                     |             |             |             |
|----------------|-------------------------------------|-------------|-------------|-------------|
|                | P                                   | -3.47139600 | -0.34011700 | -0.33915900 |
|                | C                                   | -4.40467100 | 1.26154400  | -0.61661300 |
|                | H                                   | -5.45605900 | 1.04700400  | -0.83692500 |
|                | H                                   | -4.34318700 | 1.88610600  | 0.27892300  |
|                | H                                   | -3.96347700 | 1.80621200  | -1.45603500 |
|                | C                                   | -4.37413600 | -1.23487700 | 1.03853700  |
|                | H                                   | -5.42513600 | -1.37691700 | 0.76434300  |
|                | H                                   | -3.91052500 | -2.20982800 | 1.21269100  |
|                | H                                   | -4.31761000 | -0.64927900 | 1.96037800  |
|                | C                                   | -3.73980800 | -1.36659200 | -1.88467700 |
|                | H                                   | -3.27040000 | -2.34690000 | -1.76423400 |
|                | H                                   | -4.81255600 | -1.49923700 | -2.06216500 |
|                | H                                   | -3.29165200 | -0.86368400 | -2.74616500 |
| Reactant_PhNH2 | <b>Total Energy = -856.44101237</b> |             |             |             |
|                | C                                   | 1.12602900  | 0.35933500  | 1.90074800  |
|                | H                                   | 2.19326000  | 0.17958100  | 1.97756300  |
|                | C                                   | 0.33540800  | 0.66216700  | 2.94003200  |
|                | H                                   | 0.76056300  | 0.72196200  | 3.93651400  |
|                | H                                   | -0.73103300 | 0.84953500  | 2.83604600  |
|                | O                                   | 0.63626300  | 0.18921500  | 0.58047000  |
|                | C                                   | 1.62940400  | 0.63297300  | -0.63993300 |
|                | C                                   | 1.63297100  | 2.08513900  | -0.66520800 |
|                | C                                   | 1.61392700  | 3.30805300  | -0.69916700 |
|                | C                                   | 1.60856500  | 4.77644200  | -0.74510300 |
|                | H                                   | 1.03135300  | 0.20738500  | -1.45315300 |
|                | C                                   | 2.93962400  | -0.06530800 | -0.49349700 |
|                | C                                   | 3.03361000  | -1.43817200 | -0.83263000 |
|                | C                                   | 4.23209400  | -2.13796200 | -0.69707500 |
|                | C                                   | 5.39924300  | -1.47786500 | -0.21413900 |
|                | C                                   | 5.30970400  | -0.09686700 | 0.12107900  |
|                | C                                   | 4.10187700  | 0.58947300  | -0.01828200 |
|                | H                                   | 2.15514200  | -1.96145900 | -1.20711100 |
|                | H                                   | 4.28423400  | -3.18981600 | -0.96808300 |
|                | H                                   | 6.19362300  | 0.42556500  | 0.47965500  |
|                | H                                   | 4.05823400  | 1.64770000  | 0.22655100  |
|                | H                                   | 0.77837200  | 5.15101800  | -1.35562100 |
|                | H                                   | 1.50717200  | 5.19602700  | 0.26349000  |
|                | H                                   | 2.54423500  | 5.15566400  | -1.17397200 |
|                | Au                                  | -1.42599100 | -0.14617900 | 0.16069200  |
|                | P                                   | -3.69303600 | -0.56800200 | -0.36416700 |
|                | C                                   | -4.82385600 | 0.85617100  | 0.09147100  |
|                | H                                   | -5.85737200 | 0.61510200  | -0.17998800 |
|                | H                                   | -4.76748700 | 1.04318600  | 1.16751600  |
|                | H                                   | -4.51152800 | 1.76006400  | -0.43891000 |
|                | C                                   | -4.38215000 | -2.07139100 | 0.51872500  |
|                | H                                   | -5.43065300 | -2.22077900 | 0.23885100  |
|                | H                                   | -3.80454600 | -2.95854600 | 0.24438600  |
|                | H                                   | -4.31316200 | -1.92881700 | 1.60078800  |
|                | C                                   | -3.97173300 | -0.87645000 | -2.19242900 |
|                | H                                   | -3.38481000 | -1.74085300 | -2.51534900 |
|                | H                                   | -5.03337600 | -1.06945700 | -2.38135000 |
|                | H                                   | -3.65568900 | -0.00160000 | -2.76749400 |
|                | N                                   | 6.59180800  | -2.16109500 | -0.08171500 |
|                | H                                   | 6.66501500  | -3.13767500 | -0.32774700 |
|                | H                                   | 7.42618100  | -1.69609800 | 0.24592600  |

|                |                                      |             |             |             |
|----------------|--------------------------------------|-------------|-------------|-------------|
| Reactant_PhOMe | <b>Total Energy = -915.59159349</b>  |             |             |             |
|                | C                                    | 0.75956600  | 0.94426000  | 1.88316300  |
|                | H                                    | 1.83564200  | 0.88410100  | 2.00771900  |
|                | C                                    | -0.10090900 | 1.26089100  | 2.85967700  |
|                | H                                    | 0.27299000  | 1.46124600  | 3.85828000  |
|                | H                                    | -1.17507500 | 1.32533400  | 2.70141600  |
|                | O                                    | 0.33557500  | 0.59827300  | 0.57066200  |
|                | C                                    | 1.31459800  | 0.99102400  | -0.63531900 |
|                | C                                    | 1.32004900  | 2.44060800  | -0.74130600 |
|                | C                                    | 1.30417300  | 3.65906600  | -0.84860500 |
|                | C                                    | 1.30236300  | 5.12187400  | -0.98294700 |
|                | H                                    | 0.74703600  | 0.52774700  | -1.45003700 |
|                | C                                    | 2.63952700  | 0.30726200  | -0.44214600 |
|                | C                                    | 2.74455800  | -1.07266500 | -0.71824800 |
|                | C                                    | 3.95320000  | -1.76124800 | -0.54118300 |
|                | C                                    | 5.08997900  | -1.05578300 | -0.08079600 |
|                | C                                    | 5.00005500  | 0.33006800  | 0.19161900  |
|                | C                                    | 3.78865900  | 1.00079200  | 0.01122600  |
|                | H                                    | 1.87474900  | -1.61943400 | -1.07884900 |
|                | H                                    | 4.00673400  | -2.82100200 | -0.76630100 |
|                | H                                    | 5.89155200  | 0.84749900  | 0.53100700  |
|                | H                                    | 3.73334500  | 2.06917800  | 0.20172100  |
|                | H                                    | 0.45761600  | 5.46251100  | -1.59320100 |
|                | H                                    | 1.22912000  | 5.60227700  | 0.00052400  |
|                | H                                    | 2.22799300  | 5.46890300  | -1.45828900 |
|                | Au                                   | -1.64055400 | -0.11257200 | 0.15314600  |
|                | P                                    | -3.79843400 | -0.93701200 | -0.34564500 |
|                | C                                    | -5.01848600 | 0.41945600  | -0.77445400 |
|                | H                                    | -5.99951900 | -0.01675700 | -0.99182300 |
|                | H                                    | -5.10956800 | 1.11436200  | 0.06498100  |
|                | H                                    | -4.66575300 | 0.97102800  | -1.65033200 |
|                | C                                    | -4.55633900 | -1.88064400 | 1.08608300  |
|                | H                                    | -5.55248700 | -2.24256200 | 0.80924600  |
| H              | -3.92089900                          | -2.73220400 | 1.34473400  |             |
| H              | -4.63955800                          | -1.22656700 | 1.95852000  |             |
| C              | -3.80911400                          | -2.11725500 | -1.80233500 |             |
| H              | -3.16764700                          | -2.97628200 | -1.58658400 |             |
| H              | -4.82970500                          | -2.46698500 | -1.99211600 |             |
| H              | -3.43045500                          | -1.60921200 | -2.69365100 |             |
| O              | 6.33263800                           | -1.62071900 | 0.12724900  |             |
| C              | 6.53752100                           | -3.04334000 | -0.14672000 |             |
| H              | 6.34850900                           | -3.27015200 | -1.20405400 |             |
| H              | 7.58616100                           | -3.22827000 | 0.08891100  |             |
| H              | 5.89740300                           | -3.66302300 | 0.49478400  |             |
| Reactant_PhCF3 | <b>Total Energy = -1138.12539466</b> |             |             |             |
|                | C                                    | 0.21772300  | 1.16349300  | 1.87002300  |
|                | H                                    | 1.29379500  | 1.17033100  | 2.00768800  |
|                | C                                    | -0.67686000 | 1.43354100  | 2.82771600  |
|                | H                                    | -0.33304400 | 1.66371100  | 3.83070000  |
|                | H                                    | -1.74987700 | 1.43181800  | 2.65064700  |
|                | O                                    | -0.17305100 | 0.77730600  | 0.55162400  |
|                | C                                    | 0.75611100  | 1.23386900  | -0.62175500 |
|                | C                                    | 0.72776800  | 2.68505100  | -0.71058700 |
|                | C                                    | 0.67727700  | 3.90358400  | -0.80393200 |

|               |                                     |             |             |             |
|---------------|-------------------------------------|-------------|-------------|-------------|
|               | C                                   | 0.62776800  | 5.36682200  | -0.92036100 |
|               | H                                   | 0.22656100  | 0.77449300  | -1.46439200 |
|               | C                                   | 2.11824200  | 0.58234700  | -0.44486500 |
|               | C                                   | 2.22226200  | -0.81632400 | -0.61289500 |
|               | C                                   | 3.45524500  | -1.46137600 | -0.45583900 |
|               | C                                   | 4.59732300  | -0.70226700 | -0.13145500 |
|               | C                                   | 4.50894500  | 0.69084800  | 0.03034700  |
|               | C                                   | 3.26780100  | 1.33102000  | -0.12530600 |
|               | H                                   | 1.34164100  | -1.40246900 | -0.86556000 |
|               | H                                   | 3.53252900  | -2.53718700 | -0.57854000 |
|               | H                                   | 5.39432300  | 1.26739200  | 0.27861900  |
|               | H                                   | 3.19847100  | 2.40885700  | -0.01492400 |
|               | H                                   | -0.22931400 | 5.68591700  | -1.52481200 |
|               | H                                   | 0.54139300  | 5.83245700  | 0.06900600  |
|               | H                                   | 1.54001100  | 5.74954700  | -1.39400400 |
|               | Au                                  | -2.07913800 | -0.12883400 | 0.14060500  |
|               | P                                   | -4.14885800 | -1.16180400 | -0.34343800 |
|               | C                                   | -5.47864400 | 0.07403500  | -0.81005700 |
|               | H                                   | -6.41819300 | -0.44992000 | -1.01650000 |
|               | H                                   | -5.63213200 | 0.78078700  | 0.01012600  |
|               | H                                   | -5.17124600 | 0.62927900  | -1.70058700 |
|               | C                                   | -4.82193900 | -2.13060800 | 1.11273000  |
|               | H                                   | -5.77674600 | -2.59374900 | 0.84126800  |
|               | H                                   | -4.11050000 | -2.90988300 | 1.39955400  |
|               | H                                   | -4.97466400 | -1.46252500 | 1.96487700  |
|               | C                                   | -4.04177200 | -2.37286400 | -1.76988600 |
|               | H                                   | -3.31994000 | -3.15985400 | -1.53466000 |
|               | H                                   | -5.02347800 | -2.82505700 | -1.94790700 |
|               | H                                   | -3.71566300 | -1.85263500 | -2.67479300 |
|               | C                                   | 5.92848400  | -1.39361300 | -0.00749200 |
|               | F                                   | 5.81201800  | -2.66435600 | 0.57428500  |
|               | F                                   | 6.83934500  | -0.66832900 | 0.76671200  |
|               | F                                   | 6.54206500  | -1.59399800 | -1.25915000 |
| Reactant_PhCN | <b>Total Energy = -893.29348839</b> |             |             |             |
|               | C                                   | 0.94489000  | 0.59772500  | 1.90307100  |
|               | H                                   | 2.01556100  | 0.46673500  | 2.01684900  |
|               | C                                   | 0.10619400  | 0.91788400  | 2.89558900  |
|               | H                                   | 0.49246300  | 1.04478600  | 3.90156100  |
|               | H                                   | -0.96216600 | 1.05576700  | 2.74554700  |
|               | O                                   | 0.49140800  | 0.33452900  | 0.57477900  |
|               | C                                   | 1.42254700  | 0.80315000  | -0.59937100 |
|               | C                                   | 1.41980200  | 2.25699400  | -0.64796400 |
|               | C                                   | 1.39085700  | 3.47850100  | -0.70658700 |
|               | C                                   | 1.37003600  | 4.94525400  | -0.78181100 |
|               | H                                   | 0.87185400  | 0.37514300  | -1.44496300 |
|               | C                                   | 2.77142400  | 0.12160800  | -0.45813600 |
|               | C                                   | 2.85143000  | -1.27039000 | -0.68720800 |
|               | C                                   | 4.07287700  | -1.94344900 | -0.56456800 |
|               | C                                   | 5.24059700  | -1.22331100 | -0.21288200 |
|               | C                                   | 5.16664600  | 0.17115600  | 0.00878700  |
|               | C                                   | 3.93711000  | 0.83641900  | -0.11404300 |
|               | H                                   | 1.95922900  | -1.82923900 | -0.96092300 |
|               | H                                   | 4.13469900  | -3.01251700 | -0.74245300 |
|               | H                                   | 6.06517800  | 0.72181100  | 0.26965000  |
|               | H                                   | 3.88663100  | 1.90993100  | 0.04159500  |

|                |                                      |             |             |             |
|----------------|--------------------------------------|-------------|-------------|-------------|
|                | H                                    | 0.51214900  | 5.29914600  | -1.36548100 |
|                | H                                    | 1.30721500  | 5.38500900  | 0.22106600  |
|                | H                                    | 2.28367000  | 5.32203100  | -1.25755700 |
|                | Au                                   | -1.56338700 | -0.15155900 | 0.14804300  |
|                | P                                    | -3.79269800 | -0.75019200 | -0.36028900 |
|                | C                                    | -4.90998000 | 0.73863100  | -0.58063400 |
|                | H                                    | -5.93142500 | 0.40872500  | -0.79902800 |
|                | H                                    | -4.91213200 | 1.33895200  | 0.33337700  |
|                | H                                    | -4.54524700 | 1.35583100  | -1.40638600 |
|                | C                                    | -4.57671500 | -1.79633100 | 0.98269900  |
|                | H                                    | -5.60356100 | -2.05376900 | 0.70118400  |
|                | H                                    | -3.99935300 | -2.71453400 | 1.12189000  |
|                | H                                    | -4.58916500 | -1.24212800 | 1.92529800  |
|                | C                                    | -3.93472100 | -1.74550800 | -1.94213600 |
|                | H                                    | -3.34919300 | -2.66494900 | -1.85496200 |
|                | H                                    | -4.98354000 | -2.00182900 | -2.12693700 |
|                | H                                    | -3.55261500 | -1.16156800 | -2.78402700 |
|                | C                                    | 6.50003500  | -1.90991900 | -0.08703200 |
|                | N                                    | 7.53262300  | -2.47485700 | 0.01840000  |
| Reactant_PhNO2 | <b>Total Energy = -1005.54280713</b> |             |             |             |
|                | C                                    | 0.51762100  | 1.25731700  | 1.82031600  |
|                | H                                    | 1.58625400  | 1.17342900  | 1.98849500  |
|                | C                                    | -0.37309000 | 1.65165100  | 2.73764500  |
|                | H                                    | -0.03686800 | 1.89585300  | 3.73994000  |
|                | H                                    | -1.43606200 | 1.74032300  | 2.52587700  |
|                | O                                    | 0.12268000  | 0.84814300  | 0.50900100  |
|                | C                                    | 1.09996400  | 1.19416200  | -0.66108100 |
|                | C                                    | 1.23661300  | 2.63824100  | -0.75522700 |
|                | C                                    | 1.32388900  | 3.85407000  | -0.85646700 |
|                | C                                    | 1.43734300  | 5.31304300  | -0.98023100 |
|                | H                                    | 0.52788900  | 0.79401800  | -1.50594400 |
|                | C                                    | 2.38023700  | 0.39429500  | -0.47221300 |
|                | C                                    | 2.33497100  | -1.00339700 | -0.67480400 |
|                | C                                    | 3.48249800  | -1.78753500 | -0.50298900 |
|                | C                                    | 4.67695600  | -1.14814000 | -0.12948100 |
|                | C                                    | 4.75631100  | 0.23862600  | 0.06838500  |
|                | C                                    | 3.59539300  | 1.00913100  | -0.10671500 |
|                | H                                    | 1.40322900  | -1.48036200 | -0.97016400 |
|                | H                                    | 3.47357300  | -2.86091400 | -0.65460000 |
|                | H                                    | 5.70333100  | 0.68794300  | 0.34589800  |
|                | H                                    | 3.63763000  | 2.08608700  | 0.02384200  |
|                | H                                    | 0.93107900  | 5.67000900  | -1.88482100 |
|                | H                                    | 0.97982000  | 5.81020800  | -0.11600100 |
|                | H                                    | 2.48789500  | 5.62290000  | -1.03134800 |
|                | Au                                   | -1.79055600 | -0.05656900 | 0.12994100  |
|                | P                                    | -3.87466600 | -1.08464200 | -0.29832600 |
|                | C                                    | -5.29156800 | -0.21212200 | 0.56434300  |
|                | H                                    | -6.23498300 | -0.71868200 | 0.33335300  |
|                | H                                    | -5.13152300 | -0.22515700 | 1.64606700  |
|                | H                                    | -5.34824700 | 0.82672300  | 0.22761400  |
|                | C                                    | -3.93300400 | -2.86649000 | 0.27953700  |
|                | H                                    | -4.92311600 | -3.28993600 | 0.07882700  |
|                | H                                    | -3.17607300 | -3.45320000 | -0.24829400 |
|                | H                                    | -3.73013800 | -2.91423500 | 1.35296700  |
|                | C                                    | -4.31246500 | -1.10964100 | -2.12041600 |



|               |                                      |             |             |             |
|---------------|--------------------------------------|-------------|-------------|-------------|
|               | H                                    | -3.55296700 | -1.66488500 | -2.67772200 |
|               | H                                    | -5.28662300 | -1.59041600 | -2.26099400 |
|               | H                                    | -4.35612000 | -0.08698300 | -2.50530900 |
|               | N                                    | 5.89887900  | -1.97071900 | 0.05505300  |
|               | O                                    | 5.79951300  | -3.23033400 | -0.12967600 |
|               | O                                    | 6.97453100  | -1.37135700 | 0.38979000  |
| Product_Ph    | <b>Total Energy = -801.1196886</b>   |             |             |             |
|               | C                                    | 2.27134900  | -2.58296600 | -0.27249000 |
|               | H                                    | 2.97384500  | -3.18854500 | -0.86075200 |
|               | C                                    | 2.78890500  | -1.86166300 | 0.93029000  |
|               | H                                    | 3.50835600  | -2.49233300 | 1.46314100  |
|               | H                                    | 1.97023600  | -1.59419700 | 1.60791400  |
|               | O                                    | 1.09257700  | -2.49329400 | -0.71671700 |
|               | C                                    | 2.16041600  | 1.18649100  | -1.03565100 |
|               | C                                    | 2.84042500  | 0.30175400  | -0.31398700 |
|               | C                                    | 3.51871400  | -0.58698200 | 0.39663000  |
|               | C                                    | 4.99351100  | -0.45518100 | 0.74558800  |
|               | H                                    | 5.41091500  | 0.47767000  | 0.35703900  |
|               | H                                    | 5.13436600  | -0.47237600 | 1.83509600  |
|               | H                                    | 5.57183700  | -1.29030000 | 0.32590300  |
|               | H                                    | 2.17294400  | 1.07085500  | -2.12296800 |
|               | C                                    | 1.39192200  | 2.34699200  | -0.52535400 |
|               | C                                    | 0.72768300  | 3.18685100  | -1.45119700 |
|               | C                                    | -0.00138100 | 4.30647400  | -1.01012300 |
|               | C                                    | -0.07814600 | 4.60262100  | 0.36461300  |
|               | C                                    | 0.58138800  | 3.77118100  | 1.29552300  |
|               | C                                    | 1.30845600  | 2.65301800  | 0.85602600  |
|               | H                                    | 0.80034500  | 2.97577300  | -2.51668700 |
|               | H                                    | -0.48962100 | 4.95403900  | -1.73370600 |
|               | H                                    | 0.54387300  | 4.01087600  | 2.35546800  |
|               | H                                    | 1.83372200  | 2.02936800  | 1.57621500  |
|               | Au                                   | -0.61515200 | -1.30286500 | -0.17690300 |
|               | P                                    | -2.54903100 | -0.03586300 | 0.30262700  |
|               | C                                    | -4.08330500 | -1.09842300 | 0.47600100  |
|               | H                                    | -4.25738600 | -1.65098200 | -0.45153700 |
|               | H                                    | -3.94820100 | -1.81389700 | 1.29186000  |
|               | H                                    | -4.95189600 | -0.46576700 | 0.68887300  |
|               | C                                    | -2.39971500 | 0.93775000  | 1.89586700  |
|               | H                                    | -3.32598300 | 1.49351300  | 2.07871900  |
|               | H                                    | -2.21574400 | 0.25724800  | 2.73187200  |
|               | H                                    | -1.56549400 | 1.64000400  | 1.81435300  |
|               | C                                    | -2.92766900 | 1.22237600  | -1.03319700 |
|               | H                                    | -3.83378600 | 1.77943900  | -0.77058100 |
|               | H                                    | -2.08895700 | 1.91782300  | -1.12837300 |
|               | H                                    | -3.08087400 | 0.71353700  | -1.98902200 |
|               | H                                    | -0.62596900 | 5.47708900  | 0.70560100  |
| Product_PhNH2 | <b>Total Energy = -856.477033039</b> |             |             |             |
|               | C                                    | 3.20795600  | 1.75321400  | -0.13767300 |
|               | H                                    | 3.96238200  | 2.34460900  | -0.67320600 |
|               | C                                    | 2.49339300  | 2.38074900  | 1.01286900  |
|               | H                                    | 3.18483400  | 2.99551400  | 1.59836000  |
|               | H                                    | 2.04759200  | 1.61695400  | 1.65950700  |
|               | O                                    | 2.95236800  | 0.60610200  | -0.60629600 |
|               | C                                    | -0.54967500 | 2.21103000  | -1.06935700 |
|               | C                                    | 0.41680600  | 2.75152800  | -0.32992400 |
|               | C                                    | 1.39288400  | 3.29841300  | 0.37888300  |

|               |                                    |             |             |             |
|---------------|------------------------------------|-------------|-------------|-------------|
|               | C                                  | 1.54135500  | 4.79197500  | 0.63056100  |
|               | H                                  | 0.73322200  | 5.35426600  | 0.15492800  |
|               | H                                  | 1.52639400  | 5.00594300  | 1.70835400  |
|               | H                                  | 2.49681800  | 5.16528400  | 0.23516900  |
|               | H                                  | -0.37069900 | 2.14638200  | -2.14701600 |
|               | C                                  | -1.85882600 | 1.70372300  | -0.61749100 |
|               | C                                  | -2.76686600 | 1.18002500  | -1.57092300 |
|               | C                                  | -4.03102600 | 0.70786400  | -1.19812700 |
|               | C                                  | -4.44247800 | 0.74925600  | 0.16172600  |
|               | C                                  | -3.53107900 | 1.26636100  | 1.12691800  |
|               | C                                  | -2.27175900 | 1.73341400  | 0.73934900  |
|               | H                                  | -2.48628000 | 1.16223700  | -2.62305600 |
|               | H                                  | -3.83401400 | 1.32222500  | 2.17080200  |
|               | H                                  | -1.60473700 | 2.14992600  | 1.49153200  |
|               | Au                                 | 1.43521700  | -0.82962000 | -0.13598500 |
|               | P                                  | -0.20675100 | -2.47969200 | 0.25632800  |
|               | C                                  | 0.52077200  | -4.19055700 | 0.49526700  |
|               | H                                  | 1.08640100  | -4.47968300 | -0.39494100 |
|               | H                                  | 1.19606000  | -4.18866900 | 1.35550200  |
|               | H                                  | -0.28160100 | -4.91654500 | 0.66620900  |
|               | C                                  | -1.23883500 | -2.13181600 | 1.78017800  |
|               | H                                  | -1.98385200 | -2.92430200 | 1.91195600  |
|               | H                                  | -0.59517200 | -2.09062900 | 2.66339700  |
|               | H                                  | -1.74774900 | -1.17115000 | 1.66093900  |
|               | C                                  | -1.42397900 | -2.62061200 | -1.16135700 |
|               | H                                  | -2.15005600 | -3.41297100 | -0.94823800 |
|               | H                                  | -1.94970800 | -1.66948800 | -1.28556900 |
|               | H                                  | -0.89011400 | -2.85833000 | -2.08574900 |
|               | H                                  | -4.71536600 | 0.33103900  | -1.95527900 |
|               | N                                  | -5.69781300 | 0.29926600  | 0.54193900  |
|               | H                                  | -6.01945000 | 0.40147100  | 1.49362600  |
|               | H                                  | -6.37188400 | 0.00023000  | -0.14794400 |
| Product_PhOMe | <b>Total Energy = -915.6296023</b> |             |             |             |
|               | C                                  | 3.44774900  | 1.64900400  | -0.27472500 |
|               | H                                  | 4.17795300  | 2.22335700  | -0.86016900 |
|               | C                                  | 2.86476700  | 2.27590000  | 0.94898300  |
|               | H                                  | 3.63759400  | 2.83159600  | 1.49051100  |
|               | H                                  | 2.43546400  | 1.51482900  | 1.61061800  |
|               | O                                  | 3.10576300  | 0.52569300  | -0.74229500 |
|               | C                                  | -0.24761400 | 2.39022500  | -1.03396400 |
|               | C                                  | 0.75782900  | 2.82670500  | -0.28086100 |
|               | C                                  | 1.76902800  | 3.27399400  | 0.44888800  |
|               | C                                  | 1.95202900  | 4.72879600  | 0.85571600  |
|               | H                                  | 1.13378000  | 5.34993100  | 0.48149200  |
|               | H                                  | 1.98734000  | 4.82193800  | 1.95009700  |
|               | H                                  | 2.89590400  | 5.13094000  | 0.46117400  |
|               | H                                  | -0.11753000 | 2.43545300  | -2.11906700 |
|               | C                                  | -1.54762200 | 1.85879100  | -0.57286400 |
|               | C                                  | -2.51079000 | 1.46555900  | -1.52801900 |
|               | C                                  | -3.76836400 | 0.96572700  | -1.14336900 |
|               | C                                  | -4.07887400 | 0.85262400  | 0.22897700  |
|               | C                                  | -3.12377800 | 1.24154200  | 1.20100400  |
|               | C                                  | -1.88055100 | 1.73778000  | 0.80317900  |
|               | H                                  | -2.28562500 | 1.56484000  | -2.58837600 |
|               | H                                  | -4.49094800 | 0.69163500  | -1.90503700 |
|               | H                                  | -3.39971900 | 1.16956300  | 2.24896700  |

|               |                                      |             |             |             |
|---------------|--------------------------------------|-------------|-------------|-------------|
|               | H                                    | -1.16624800 | 2.05949600  | 1.55787000  |
|               | Au                                   | 1.59770100  | -0.88711600 | -0.18173500 |
|               | P                                    | -0.05992300 | -2.49867600 | 0.29881900  |
|               | C                                    | 0.62287700  | -4.24190100 | 0.38821300  |
|               | H                                    | 1.09418600  | -4.50398900 | -0.56316000 |
|               | H                                    | 1.37262400  | -4.30588900 | 1.18180400  |
|               | H                                    | -0.18746800 | -4.94862400 | 0.59787700  |
|               | C                                    | -0.93298700 | -2.19344400 | 1.92785900  |
|               | H                                    | -1.66767500 | -2.98588500 | 2.10854800  |
|               | H                                    | -0.20555800 | -2.18279800 | 2.74426900  |
|               | H                                    | -1.44562400 | -1.22822600 | 1.88987000  |
|               | C                                    | -1.40392600 | -2.52673800 | -1.00650000 |
|               | H                                    | -2.16189200 | -3.27241400 | -0.74238200 |
|               | H                                    | -1.87007900 | -1.53961300 | -1.07186500 |
|               | H                                    | -0.96972700 | -2.78033200 | -1.97777500 |
|               | O                                    | -5.27936900 | 0.37750800  | 0.73312100  |
|               | C                                    | -6.37466200 | 0.07759800  | -0.18900300 |
|               | H                                    | -6.65144400 | 0.96644500  | -0.77033000 |
|               | H                                    | -6.10865600 | -0.74600500 | -0.86528800 |
|               | H                                    | -7.20801500 | -0.22254600 | 0.44743800  |
| Product_PhCF3 | <b>Total Energy = -1138.16348258</b> |             |             |             |
|               | C                                    | 0.21033000  | 1.03824800  | -1.25036700 |
|               | H                                    | -0.74383500 | 0.83810200  | -1.75665100 |
|               | C                                    | 0.43120600  | 2.41291300  | -0.69729800 |
|               | H                                    | 0.46032300  | 3.10578500  | -1.55662700 |
|               | H                                    | 1.40651400  | 2.47422900  | -0.19428600 |
|               | O                                    | 1.02981000  | 0.08294400  | -1.19474700 |
|               | C                                    | -2.26042600 | 1.06887800  | 1.45393900  |
|               | C                                    | -1.48732400 | 1.95225500  | 0.83043300  |
|               | C                                    | -0.70765700 | 2.84891100  | 0.24317900  |
|               | C                                    | -0.84293500 | 4.34996500  | 0.46092100  |
|               | H                                    | -1.61765900 | 4.57327600  | 1.19905100  |
|               | H                                    | 0.10454800  | 4.77774100  | 0.81781200  |
|               | H                                    | -1.10328000 | 4.86144300  | -0.47639100 |
|               | H                                    | -1.92425300 | 0.69500300  | 2.42453100  |
|               | C                                    | -3.55169200 | 0.52364600  | 0.97337300  |
|               | C                                    | -4.18070100 | -0.49760300 | 1.72266500  |
|               | C                                    | -5.40134500 | -1.04741600 | 1.30402400  |
|               | C                                    | -6.00665100 | -0.57689900 | 0.12495200  |
|               | C                                    | -5.39857000 | 0.44665400  | -0.62975200 |
|               | C                                    | -4.17952700 | 0.99010500  | -0.20742500 |
|               | H                                    | -3.71456600 | -0.86323600 | 2.63465600  |
|               | H                                    | -5.87300400 | -1.83663900 | 1.88117400  |
|               | H                                    | -5.87480200 | 0.80604500  | -1.53693500 |
|               | H                                    | -3.72042300 | 1.79004300  | -0.78271400 |
|               | Au                                   | 2.97954000  | -0.26577300 | -0.37934200 |
|               | P                                    | 5.12910200  | -0.82022800 | 0.43360900  |
|               | C                                    | 6.03150400  | -1.99517900 | -0.71446300 |
|               | H                                    | 5.45585800  | -2.91795000 | -0.82835500 |
|               | H                                    | 6.15267400  | -1.53255400 | -1.69789400 |
|               | H                                    | 7.01833400  | -2.23281200 | -0.30256300 |
|               | C                                    | 6.24069000  | 0.67516500  | 0.63079700  |
|               | H                                    | 7.22634300  | 0.36109400  | 0.99086600  |
|               | H                                    | 6.35390100  | 1.18168200  | -0.33172800 |
|               | H                                    | 5.80031000  | 1.37326900  | 1.34807700  |
|               | C                                    | 5.07149800  | -1.66015200 | 2.10769500  |

|               |                                     |             |             |             |
|---------------|-------------------------------------|-------------|-------------|-------------|
|               | H                                   | 6.08803000  | -1.89976400 | 2.43801200  |
|               | H                                   | 4.60015100  | -0.99854100 | 2.83961200  |
|               | H                                   | 4.48777000  | -2.58224900 | 2.03877100  |
|               | C                                   | -7.33354300 | -1.13101700 | -0.30718200 |
|               | F                                   | -7.51516300 | -2.46257900 | 0.09032200  |
|               | F                                   | -7.50153900 | -1.09334100 | -1.69960500 |
|               | F                                   | -8.42227100 | -0.41395300 | 0.23156000  |
| Product_PhCN  | <b>Total Energy = -893.3338111</b>  |             |             |             |
|               | C                                   | 3.32559200  | 1.51130700  | -0.29203500 |
|               | H                                   | 4.06566200  | 2.05029100  | -0.89887000 |
|               | C                                   | 2.84778500  | 2.15239100  | 0.97224700  |
|               | H                                   | 3.69755500  | 2.60111400  | 1.49926700  |
|               | H                                   | 2.36975300  | 1.41546600  | 1.62869700  |
|               | O                                   | 2.89579100  | 0.42170000  | -0.76053500 |
|               | C                                   | -0.16705300 | 2.70083300  | -1.05755900 |
|               | C                                   | 0.83699600  | 2.99882800  | -0.24019600 |
|               | C                                   | 1.84574400  | 3.27885400  | 0.57122100  |
|               | C                                   | 2.10041200  | 4.65470600  | 1.16796800  |
|               | H                                   | 1.32123300  | 5.36484300  | 0.87816900  |
|               | H                                   | 2.13058200  | 4.59915200  | 2.26489800  |
|               | H                                   | 3.06824200  | 5.05163200  | 0.83161700  |
|               | H                                   | -0.01604800 | 2.84606100  | -2.13006900 |
|               | C                                   | -1.49254900 | 2.17411900  | -0.66033400 |
|               | C                                   | -2.42230800 | 1.82507500  | -1.66902900 |
|               | C                                   | -3.67955600 | 1.29841600  | -1.33936500 |
|               | C                                   | -4.03385900 | 1.11283700  | 0.01771100  |
|               | C                                   | -3.11627600 | 1.47800500  | 1.03576300  |
|               | C                                   | -1.86281100 | 1.99989200  | 0.69718800  |
|               | H                                   | -2.16169900 | 1.97071600  | -2.71490400 |
|               | H                                   | -3.40262100 | 1.36424300  | 2.07763600  |
|               | H                                   | -1.17111500 | 2.29237500  | 1.48320700  |
|               | Au                                  | 1.38049700  | -0.98670700 | -0.19271100 |
|               | P                                   | -0.28232500 | -2.59437800 | 0.29458300  |
|               | C                                   | 0.37757700  | -4.34790600 | 0.25527600  |
|               | H                                   | 0.79169000  | -4.56549000 | -0.73317700 |
|               | H                                   | 1.16794200  | -4.46377000 | 1.00210800  |
|               | H                                   | -0.43165000 | -5.05381200 | 0.47176200  |
|               | C                                   | -1.04967200 | -2.35968200 | 1.98779500  |
|               | H                                   | -1.80900600 | -3.13005600 | 2.16120300  |
|               | H                                   | -0.27828100 | -2.43363100 | 2.75935100  |
|               | H                                   | -1.51854700 | -1.37346100 | 2.04466100  |
|               | C                                   | -1.69912100 | -2.53712800 | -0.93063900 |
|               | H                                   | -2.45000100 | -3.28925100 | -0.66489800 |
|               | H                                   | -2.15968600 | -1.54551400 | -0.91755200 |
|               | H                                   | -1.32445700 | -2.74077300 | -1.93772900 |
|               | H                                   | -4.38903600 | 1.03988500  | -2.11979100 |
|               | C                                   | -5.31215400 | 0.55220700  | 0.36689700  |
|               | N                                   | -6.35481400 | 0.07647800  | 0.65809400  |
| Product_PhNO2 | <b>Total Energy = -1005.5845528</b> |             |             |             |
|               | C                                   | 2.87882100  | 1.91603900  | -0.88043000 |
|               | H                                   | 3.22338500  | 2.59117000  | -1.67601600 |
|               | C                                   | 2.97719700  | 2.39702500  | 0.53641000  |
|               | H                                   | 3.98194400  | 2.81513100  | 0.69577200  |
|               | H                                   | 2.84011100  | 1.56287000  | 1.23787500  |
|               | O                                   | 2.40527400  | 0.80774600  | -1.24502200 |
|               | C                                   | -0.31020800 | 3.52854100  | -0.61559700 |

|       |                                                             |             |             |             |
|-------|-------------------------------------------------------------|-------------|-------------|-------------|
|       | C                                                           | 0.80869400  | 3.54829400  | 0.10225500  |
|       | C                                                           | 1.92472000  | 3.49928300  | 0.81391500  |
|       | C                                                           | 2.24287400  | 4.44104300  | 1.96531600  |
|       | H                                                           | 1.40388500  | 5.11011800  | 2.17419800  |
|       | H                                                           | 2.47302100  | 3.87545300  | 2.87906000  |
|       | H                                                           | 3.12049300  | 5.05790400  | 1.72847000  |
|       | H                                                           | -0.38000900 | 4.15956800  | -1.50361000 |
|       | C                                                           | -1.47937500 | 2.66640600  | -0.33002800 |
|       | C                                                           | -2.56057300 | 2.63583200  | -1.24293700 |
|       | C                                                           | -3.63135900 | 1.74780200  | -1.06122200 |
|       | C                                                           | -3.60351800 | 0.88177200  | 0.04409500  |
|       | C                                                           | -2.57073400 | 0.92619800  | 1.00035700  |
|       | C                                                           | -1.51730800 | 1.82227500  | 0.80993500  |
|       | H                                                           | -2.55485800 | 3.29505000  | -2.10741200 |
|       | H                                                           | -2.61875500 | 0.27571300  | 1.86706000  |
|       | H                                                           | -0.71541800 | 1.87661700  | 1.54136800  |
|       | Au                                                          | 1.42571200  | -0.90206100 | -0.37360300 |
|       | P                                                           | 0.32999300  | -2.86288300 | 0.37337200  |
|       | C                                                           | 1.03703300  | -4.39359300 | -0.44561400 |
|       | H                                                           | 0.91314900  | -4.32387800 | -1.52998700 |
|       | H                                                           | 2.10293300  | -4.48003400 | -0.21702600 |
|       | H                                                           | 0.51400100  | -5.28367900 | -0.07904700 |
|       | C                                                           | 0.50941200  | -3.13247600 | 2.21916800  |
|       | H                                                           | 0.00143700  | -4.05863500 | 2.50954100  |
|       | H                                                           | 1.56823500  | -3.20395700 | 2.48259300  |
|       | H                                                           | 0.06402400  | -2.29458100 | 2.76258800  |
|       | C                                                           | -1.50753000 | -2.87970600 | 0.01061600  |
|       | H                                                           | -1.94077500 | -3.82077400 | 0.36692600  |
|       | H                                                           | -2.00986200 | -2.05022600 | 0.51417700  |
|       | H                                                           | -1.67230400 | -2.79439100 | -1.06729000 |
|       | H                                                           | -4.45956300 | 1.70390700  | -1.76017100 |
|       | N                                                           | -4.66040600 | -0.13190400 | 0.19841000  |
|       | O                                                           | -5.70219300 | -0.04452900 | -0.53142600 |
|       | O                                                           | -4.45335800 | -1.07725900 | 1.04503200  |
| TS_Ph | <b>Total Energy = -801.06749518 , Frequency = -143.6374</b> |             |             |             |
|       | C                                                           | -1.73292100 | -1.95003800 | 0.70421200  |
|       | H                                                           | -1.51037800 | -1.72107700 | 1.75073400  |
|       | C                                                           | -2.70141400 | -2.87396400 | 0.39265500  |
|       | H                                                           | -3.17893400 | -3.44422200 | 1.18469500  |
|       | H                                                           | -2.87474000 | -3.17212000 | -0.63655600 |
|       | O                                                           | -1.12015100 | -1.20855400 | -0.24001700 |
|       | C                                                           | -2.61710700 | 0.47949400  | -1.07998000 |
|       | C                                                           | -3.70811700 | -0.23195100 | -0.63021600 |
|       | C                                                           | -4.51214000 | -1.07244600 | -0.18337900 |
|       | C                                                           | -5.71914600 | -1.81147700 | 0.21297400  |
|       | H                                                           | -2.21882300 | 0.19947700  | -2.05510000 |
|       | C                                                           | -2.09102700 | 1.69326700  | -0.48405500 |
|       | C                                                           | -1.06317200 | 2.39808600  | -1.16904200 |
|       | C                                                           | -0.54344000 | 3.58663600  | -0.63849700 |
|       | C                                                           | -1.03583700 | 4.08395800  | 0.58676200  |
|       | C                                                           | -2.05283300 | 3.38906900  | 1.27903200  |
|       | C                                                           | -2.58056500 | 2.20544500  | 0.74950400  |
|       | H                                                           | -0.69852500 | 2.01923800  | -2.12201400 |
|       | H                                                           | 0.22378800  | 4.13564100  | -1.17738200 |
|       | H                                                           | -2.43349100 | 3.78320000  | 2.21709000  |
|       | H                                                           | -3.37571000 | 1.67813800  | 1.27024100  |

|          |                                                            |             |             |             |
|----------|------------------------------------------------------------|-------------|-------------|-------------|
|          | H                                                          | -0.64194200 | 5.01176300  | 0.99359400  |
|          | H                                                          | -5.77698600 | -1.93061900 | 1.30071600  |
|          | H                                                          | -6.60767600 | -1.25100600 | -0.11072100 |
|          | H                                                          | -5.75497700 | -2.80292100 | -0.25095600 |
|          | Au                                                         | 0.89700400  | -0.65574500 | -0.04928900 |
|          | P                                                          | 3.19975000  | -0.12116700 | 0.08977100  |
|          | C                                                          | 4.30984200  | -1.61746100 | -0.12405300 |
|          | H                                                          | 5.36184000  | -1.31899100 | -0.05944700 |
|          | H                                                          | 4.09299800  | -2.35128100 | 0.65736700  |
|          | H                                                          | 4.12342500  | -2.07840500 | -1.09820500 |
|          | C                                                          | 3.68829300  | 0.63591200  | 1.73434300  |
|          | H                                                          | 4.75912100  | 0.86687100  | 1.73967700  |
|          | H                                                          | 3.11777400  | 1.55385100  | 1.90119700  |
|          | H                                                          | 3.46636300  | -0.06629900 | 2.54296600  |
|          | C                                                          | 3.76221800  | 1.10691100  | -1.21181400 |
|          | H                                                          | 3.20619200  | 2.04209700  | -1.10052600 |
|          | H                                                          | 4.83341100  | 1.30779800  | -1.10135400 |
|          | H                                                          | 3.57307400  | 0.70004500  | -2.20928500 |
| TS_PhNH2 | <b>Total Energy = -856.43309785, Frequency = -169.6509</b> |             |             |             |
|          | C                                                          | -0.88594200 | -2.48055200 | 0.84880700  |
|          | H                                                          | -0.79186200 | -2.13483100 | 1.88414700  |
|          | C                                                          | -1.55421100 | -3.65522100 | 0.57910100  |
|          | H                                                          | -1.90046200 | -4.27753900 | 1.39955300  |
|          | H                                                          | -1.54252500 | -4.07573000 | -0.42149900 |
|          | O                                                          | -0.43928900 | -1.67279300 | -0.12325600 |
|          | C                                                          | -2.66776200 | -0.42351200 | -1.18451900 |
|          | C                                                          | -3.30584500 | -1.54079100 | -0.69534700 |
|          | C                                                          | -3.69634200 | -2.62935600 | -0.22225100 |
|          | C                                                          | -4.58424200 | -3.75294700 | 0.12776600  |
|          | H                                                          | -2.11202000 | -0.54830200 | -2.11471700 |
|          | C                                                          | -2.75097300 | 0.90059700  | -0.64861900 |
|          | C                                                          | -2.10356900 | 1.97830600  | -1.32891400 |
|          | C                                                          | -2.18902000 | 3.28409000  | -0.86414800 |
|          | C                                                          | -2.93430400 | 3.57746600  | 0.31944300  |
|          | C                                                          | -3.57584900 | 2.50481900  | 1.01668500  |
|          | C                                                          | -3.48607300 | 1.20565800  | 0.54068800  |
|          | H                                                          | -1.54351700 | 1.76847400  | -2.23813600 |
|          | H                                                          | -1.70418400 | 4.09363900  | -1.40451800 |
|          | H                                                          | -4.14658500 | 2.72140400  | 1.91670300  |
|          | H                                                          | -3.99146300 | 0.40133700  | 1.06889600  |
|          | H                                                          | -4.68298100 | -3.86163900 | 1.21370200  |
|          | H                                                          | -5.58560800 | -3.56571900 | -0.28483300 |
|          | H                                                          | -4.21712300 | -4.69951900 | -0.28299100 |
|          | Au                                                         | 1.32674800  | -0.58482100 | 0.00259900  |
|          | P                                                          | 3.38392600  | 0.58737000  | 0.03582000  |
|          | C                                                          | 4.86382000  | -0.51700800 | -0.29367700 |
|          | H                                                          | 5.78803600  | 0.07056200  | -0.26775600 |
|          | H                                                          | 4.91219500  | -1.30253100 | 0.46579600  |
|          | H                                                          | 4.76058600  | -0.98720600 | -1.27578900 |
|          | C                                                          | 3.74588000  | 1.42227900  | 1.67604500  |
|          | H                                                          | 4.70711500  | 1.94584300  | 1.62983300  |
|          | H                                                          | 2.95283700  | 2.13887900  | 1.90796000  |
|          | H                                                          | 3.78162300  | 0.67116300  | 2.47030800  |
|          | C                                                          | 3.49323100  | 1.95238500  | -1.24705400 |
|          | H                                                          | 2.69679100  | 2.68222100  | -1.07587500 |
|          | H                                                          | 4.46498400  | 2.45420000  | -1.18351700 |

|          |                                                             |             |             |             |
|----------|-------------------------------------------------------------|-------------|-------------|-------------|
|          | H                                                           | 3.37205500  | 1.52701300  | -2.24747100 |
|          | N                                                           | -3.04060300 | 4.86709500  | 0.77942900  |
|          | H                                                           | -3.58321500 | 5.08513200  | 1.60410700  |
|          | H                                                           | -2.62088500 | 5.63890000  | 0.27946600  |
| TS_PhOMe | <b>Total Energy = -915.58064762 , Frequency = -131.6745</b> |             |             |             |
|          | C                                                           | -0.75588100 | -2.75441500 | 0.83955200  |
|          | H                                                           | -0.66454200 | -2.40027500 | 1.87150500  |
|          | C                                                           | -1.34833300 | -3.96814400 | 0.58191400  |
|          | H                                                           | -1.64761000 | -4.60943700 | 1.40624300  |
|          | H                                                           | -1.35774000 | -4.37668000 | -0.42368300 |
|          | O                                                           | -0.37892400 | -1.91740300 | -0.14397800 |
|          | C                                                           | -2.48460800 | -0.81783000 | -1.16140500 |
|          | C                                                           | -3.18687200 | -1.89879000 | -0.67442200 |
|          | C                                                           | -3.62115300 | -2.96580000 | -0.19895300 |
|          | C                                                           | -4.48305200 | -4.09085600 | 0.19397600  |
|          | H                                                           | -1.94270600 | -0.96831600 | -2.09533300 |
|          | C                                                           | -2.52510800 | 0.52062000  | -0.63820700 |
|          | C                                                           | -1.86322400 | 1.56320100  | -1.34637700 |
|          | C                                                           | -1.90390800 | 2.88601800  | -0.89955200 |
|          | C                                                           | -2.61252000 | 3.19309100  | 0.29055200  |
|          | C                                                           | -3.26873900 | 2.16373500  | 1.02036900  |
|          | C                                                           | -3.22930100 | 0.85464900  | 0.56110600  |
|          | H                                                           | -1.33017800 | 1.32550300  | -2.26488700 |
|          | H                                                           | -1.41079400 | 3.66547700  | -1.47044700 |
|          | H                                                           | -3.80412700 | 2.43874100  | 1.92333000  |
|          | H                                                           | -3.74700100 | 0.07221200  | 1.10918700  |
|          | H                                                           | -4.55573900 | -4.17740400 | 1.28388600  |
|          | H                                                           | -5.49652900 | -3.92472700 | -0.19805100 |
|          | H                                                           | -4.11347200 | -5.04032600 | -0.20769600 |
|          | Au                                                          | 1.32181900  | -0.71722300 | -0.01461500 |
|          | P                                                           | 3.31467200  | 0.56020900  | 0.04944400  |
|          | C                                                           | 4.79437100  | -0.35259000 | -0.65447500 |
|          | H                                                           | 5.68808000  | 0.27871300  | -0.60177700 |
|          | H                                                           | 4.96476300  | -1.26989600 | -0.08376700 |
|          | H                                                           | 4.60094400  | -0.62105900 | -1.69694900 |
|          | C                                                           | 3.81871400  | 1.05811800  | 1.78611500  |
|          | H                                                           | 4.75032200  | 1.63383200  | 1.75909400  |
|          | H                                                           | 3.02993000  | 1.66456000  | 2.24026000  |
|          | H                                                           | 3.96591900  | 0.16241600  | 2.39631300  |
|          | C                                                           | 3.21587100  | 2.16377500  | -0.91871000 |
|          | H                                                           | 2.40566500  | 2.78176300  | -0.52151700 |
|          | H                                                           | 4.16150700  | 2.71148500  | -0.84211500 |
|          | H                                                           | 3.01048900  | 1.94524000  | -1.97064000 |
|          | O                                                           | -2.73119100 | 4.45246600  | 0.82314800  |
|          | C                                                           | -2.15939800 | 5.60873200  | 0.12546600  |
|          | H                                                           | -2.60213300 | 5.71784700  | -0.87209700 |
|          | H                                                           | -2.42099800 | 6.46699200  | 0.74457000  |
|          | H                                                           | -1.06809800 | 5.51918600  | 0.05245300  |
| TS_PhCF3 | <b>Total Energy = -1138.11193740, Frequency = -136.3178</b> |             |             |             |
|          | C                                                           | -3.11349900 | -0.86277900 | 0.73694200  |
|          | H                                                           | -2.71081500 | -0.84398200 | 1.75324600  |
|          | C                                                           | -4.46706700 | -0.95273200 | 0.53408900  |
|          | H                                                           | -5.13246700 | -1.10266400 | 1.37982400  |
|          | H                                                           | -4.88117300 | -1.02219100 | -0.46703800 |
|          | O                                                           | -2.24085600 | -0.67316800 | -0.27967700 |
|          | C                                                           | -2.40548700 | 1.45072200  | -1.14428000 |

|         |                                                            |             |             |             |
|---------|------------------------------------------------------------|-------------|-------------|-------------|
|         | C                                                          | -3.58718400 | 1.74001000  | -0.49238100 |
|         | C                                                          | -4.67422700 | 1.71588100  | 0.11150100  |
|         | C                                                          | -5.97639200 | 1.99159500  | 0.72915700  |
|         | H                                                          | -2.49396200 | 0.99536500  | -2.13059600 |
|         | C                                                          | -1.08107000 | 1.93316300  | -0.77469600 |
|         | C                                                          | -0.01304900 | 1.72607500  | -1.68657800 |
|         | C                                                          | 1.28867600  | 2.11568000  | -1.35507500 |
|         | C                                                          | 1.53546700  | 2.70241200  | -0.09745300 |
|         | C                                                          | 0.48284700  | 2.94306600  | 0.80884900  |
|         | C                                                          | -0.82183400 | 2.56909200  | 0.46662900  |
|         | H                                                          | -0.21048500 | 1.26880700  | -2.65291700 |
|         | H                                                          | 2.10123500  | 1.97321000  | -2.06113700 |
|         | H                                                          | 0.68633100  | 3.41984400  | 1.76238500  |
|         | H                                                          | -1.63960300 | 2.75646400  | 1.15653500  |
|         | H                                                          | -5.93198900 | 1.89284500  | 1.81963900  |
|         | H                                                          | -6.27426100 | 3.02449100  | 0.49900500  |
|         | H                                                          | -6.75302000 | 1.32119600  | 0.34566200  |
|         | Au                                                         | -0.27466400 | -1.44869100 | -0.09284400 |
|         | P                                                          | 1.88784200  | -2.39456200 | 0.13230900  |
|         | C                                                          | 1.96281600  | -4.17443300 | -0.45324100 |
|         | H                                                          | 2.97476900  | -4.57109900 | -0.31712900 |
|         | H                                                          | 1.25608800  | -4.78205900 | 0.11893600  |
|         | H                                                          | 1.69331500  | -4.22655900 | -1.51197800 |
|         | C                                                          | 2.47954300  | -2.41672600 | 1.91125100  |
|         | H                                                          | 3.47357900  | -2.87330800 | 1.96973100  |
|         | H                                                          | 2.53131300  | -1.39307100 | 2.29245700  |
|         | H                                                          | 1.78152200  | -2.99020500 | 2.52755400  |
|         | C                                                          | 3.22335500  | -1.48868900 | -0.82218900 |
|         | H                                                          | 3.31669900  | -0.46636200 | -0.44601600 |
|         | H                                                          | 4.18143700  | -2.00503200 | -0.69682900 |
|         | H                                                          | 2.96695400  | -1.46182500 | -1.88507700 |
|         | C                                                          | 2.95602700  | 3.00052600  | 0.29058800  |
|         | F                                                          | 3.63773300  | 1.80318300  | 0.65520100  |
|         | F                                                          | 3.06424900  | 3.85499500  | 1.38337100  |
|         | F                                                          | 3.70231500  | 3.55063200  | -0.75495200 |
| TS_PhCN | <b>Total Energy = -893.27936929, Frequency = -129.6852</b> |             |             |             |
|         | C                                                          | 1.94421700  | -2.05735500 | -0.78424800 |
|         | H                                                          | 1.66735600  | -1.79869200 | -1.81015300 |
|         | C                                                          | 2.99253900  | -2.91133200 | -0.54870000 |
|         | H                                                          | 3.48859600  | -3.40105900 | -1.38217000 |
|         | H                                                          | 3.24046200  | -3.22911000 | 0.45923600  |
|         | O                                                          | 1.29870300  | -1.41554500 | 0.21524100  |
|         | C                                                          | 2.63138500  | 0.27009100  | 1.13445100  |
|         | C                                                          | 3.78752900  | -0.23190100 | 0.57325600  |
|         | C                                                          | 4.67968500  | -0.90875000 | 0.03087900  |
|         | C                                                          | 5.93287400  | -1.46628500 | -0.49214900 |
|         | H                                                          | 2.33948500  | -0.13966900 | 2.10100500  |
|         | C                                                          | 1.92005800  | 1.45859300  | 0.69116200  |
|         | C                                                          | 0.86607500  | 1.95987400  | 1.50123400  |
|         | C                                                          | 0.15195200  | 3.09904300  | 1.11809700  |
|         | C                                                          | 0.47305600  | 3.75494000  | -0.09628300 |
|         | C                                                          | 1.52726900  | 3.26509600  | -0.91032800 |
|         | C                                                          | 2.24457600  | 2.13275900  | -0.51707000 |
|         | H                                                          | 0.62616900  | 1.46198300  | 2.43794500  |
|         | H                                                          | -0.63890400 | 3.49424700  | 1.74818700  |



|          |                                                             |             |             |             |
|----------|-------------------------------------------------------------|-------------|-------------|-------------|
|          | H                                                           | 1.77386300  | 3.78172700  | -1.83279200 |
|          | H                                                           | 3.06028300  | 1.76576900  | -1.13368600 |
|          | H                                                           | 5.92451600  | -1.51239400 | -1.58701200 |
|          | H                                                           | 6.76950700  | -0.81982100 | -0.19107800 |
|          | H                                                           | 6.12139900  | -2.47092200 | -0.09881300 |
|          | Au                                                          | -0.76416400 | -1.01895000 | 0.04636200  |
|          | P                                                           | -3.10522700 | -0.68346200 | -0.09620500 |
|          | C                                                           | -3.96110100 | -0.74591400 | 1.57160600  |
|          | H                                                           | -5.03982800 | -0.60303800 | 1.44590400  |
|          | H                                                           | -3.77827600 | -1.71576800 | 2.04285300  |
|          | H                                                           | -3.56658500 | 0.04027200  | 2.22145200  |
|          | C                                                           | -3.95518600 | -1.98438300 | -1.14557300 |
|          | H                                                           | -5.03331200 | -1.79356800 | -1.17957700 |
|          | H                                                           | -3.55200700 | -1.96045100 | -2.16189800 |
|          | H                                                           | -3.77680300 | -2.97604800 | -0.72022600 |
|          | C                                                           | -3.58230100 | 0.96438900  | -0.85308300 |
|          | H                                                           | -3.18454800 | 1.03138500  | -1.86962300 |
|          | H                                                           | -4.67279600 | 1.06260000  | -0.88509400 |
|          | H                                                           | -3.16349900 | 1.78119100  | -0.25882500 |
|          | C                                                           | -0.27487000 | 4.91365700  | -0.50450200 |
|          | N                                                           | -0.90198200 | 5.85708400  | -0.84279600 |
| TS_PhNO2 | <b>Total Energy = -1005.52848708, Frequency = -131.7636</b> |             |             |             |
|          | C                                                           | -2.60047600 | -1.54663300 | 0.79032700  |
|          | H                                                           | -2.23398200 | -1.36222300 | 1.80366100  |
|          | C                                                           | -3.85696100 | -2.06061300 | 0.59286900  |
|          | H                                                           | -4.45510100 | -2.37114700 | 1.44507300  |
|          | H                                                           | -4.21627000 | -2.29666800 | -0.40398300 |
|          | O                                                           | -1.81849300 | -1.13908200 | -0.23612700 |
|          | C                                                           | -2.61777100 | 0.78657300  | -1.18142000 |
|          | C                                                           | -3.85182100 | 0.72474000  | -0.56496200 |
|          | C                                                           | -4.89476000 | 0.39763900  | 0.02772800  |
|          | C                                                           | -6.23163300 | 0.27936400  | 0.61996100  |
|          | H                                                           | -2.52786900 | 0.28728700  | -2.14574600 |
|          | C                                                           | -1.51843400 | 1.66365600  | -0.80133700 |
|          | C                                                           | -0.37510200 | 1.70559100  | -1.64263900 |
|          | C                                                           | 0.75053600  | 2.45016300  | -1.27744900 |
|          | C                                                           | 0.71865100  | 3.15513900  | -0.06195400 |
|          | C                                                           | -0.41900800 | 3.18496300  | 0.76673200  |
|          | C                                                           | -1.53697900 | 2.43231200  | 0.39287600  |
|          | H                                                           | -0.37576500 | 1.15233000  | -2.57837700 |
|          | H                                                           | 1.63583600  | 2.49132800  | -1.90160700 |
|          | H                                                           | -0.40465300 | 3.77478300  | 1.67682000  |
|          | H                                                           | -2.42204400 | 2.42688400  | 1.02239600  |
|          | H                                                           | -6.18399500 | 0.24628700  | 1.71427600  |
|          | H                                                           | -6.83063100 | 1.15707600  | 0.33798300  |
|          | H                                                           | -6.75230400 | -0.61519900 | 0.26169000  |
|          | Au                                                          | 0.29347700  | -1.28785600 | -0.05781500 |
|          | P                                                           | 2.64615200  | -1.52386800 | 0.13913400  |
|          | C                                                           | 3.26317300  | -3.18235400 | -0.48263200 |
|          | H                                                           | 4.34971400  | -3.24615900 | -0.35823400 |
|          | H                                                           | 2.78703600  | -3.98975800 | 0.08083600  |
|          | H                                                           | 3.01312200  | -3.29756300 | -1.54107300 |
|          | C                                                           | 3.23765300  | -1.40070400 | 1.91434600  |
|          | H                                                           | 4.32352000  | -1.53922600 | 1.95537500  |
|          | H                                                           | 2.98500000  | -0.41787900 | 2.32203200  |

|   |            |             |             |
|---|------------|-------------|-------------|
| H | 2.75184200 | -2.17033600 | 2.52068500  |
| C | 3.62711400 | -0.23569700 | -0.80765600 |
| H | 3.37286800 | 0.77020900  | -0.46149900 |
| H | 4.69878000 | -0.40390500 | -0.65428200 |
| H | 3.40308100 | -0.31351700 | -1.87553200 |
| N | 1.93956700 | 3.86776700  | 0.37245500  |
| O | 1.83912600 | 4.71096900  | 1.32257300  |
| O | 3.03721700 | 3.56771500  | -0.21845000 |

|                | <b>Uncatalyzed Rearrangement</b>    |             |             |                                     |             |             |
|----------------|-------------------------------------|-------------|-------------|-------------------------------------|-------------|-------------|
|                | <b>B3LYP/LANL2DZ</b>                |             |             | <b>B3LYP/6-31g**</b>                |             |             |
| Reactant_Ph    | <b>Total Energy = -539.5454573</b>  |             |             | <b>Total Energy = -539.6423393</b>  |             |             |
|                | C 1.00694600                        | 2.01321600  | 0.64009900  | C 1.00077500                        | 2.00021400  | 0.58825100  |
|                | H 0.80801000                        | 1.24385400  | 1.38512500  | H 0.99755000                        | 1.19601100  | 1.32017900  |
|                | C 1.36624700                        | 3.26745400  | 0.96586800  | C 1.16740500                        | 3.27764900  | 0.92409900  |
|                | H 1.46311400                        | 3.54949000  | 2.00898500  | H 1.30635700                        | 3.54722200  | 1.96353200  |
|                | H 1.56243600                        | 4.01817100  | 0.20611100  | H 1.17238400                        | 4.06520300  | 0.17880500  |
|                | O 0.85349700                        | 1.62456600  | -0.69625900 | O 0.83854900                        | 1.61450900  | -0.71627300 |
|                | C 0.56345300                        | 0.18703100  | -0.95416000 | C 0.57738700                        | 0.21316700  | -0.94399800 |
|                | C 1.66975700                        | -0.67439900 | -0.50272800 | C 1.68529900                        | -0.63178900 | -0.47908600 |
|                | C 2.62024300                        | -1.36451500 | -0.16427300 | C 2.62394800                        | -1.30505700 | -0.11992000 |
|                | C 3.77445400                        | -2.18048400 | 0.24218100  | C 3.76300200                        | -2.11033700 | 0.30886300  |
|                | H 4.59503700                        | -1.54096100 | 0.59131800  | H 4.65204000                        | -1.48538400 | 0.44634000  |
|                | H 3.51125500                        | -2.86673400 | 1.05694300  | H 3.56011300                        | -2.61731900 | 1.25838500  |
|                | H 0.53465100                        | 0.17460500  | -2.05077700 | H 0.54652200                        | 0.15855200  | -2.03944700 |
|                | C -0.82164800                       | -0.19903400 | -0.41854000 | C -0.79882000                       | -0.19992300 | -0.41259500 |
|                | C -1.91436100                       | 0.64187200  | -0.72606900 | C -1.87790100                       | 0.67520700  | -0.59570900 |
|                | C -3.20849500                       | 0.31381800  | -0.28969100 | C -3.15536300                       | 0.31809400  | -0.16934100 |
|                | C -3.42687300                       | -0.86130500 | 0.45843500  | C -3.37171100                       | -0.91982500 | 0.44106100  |
|                | C -2.34154100                       | -1.70138700 | 0.76647300  | C -2.30178900                       | -1.79486600 | 0.62351700  |
|                | C -1.04313700                       | -1.37125600 | 0.32955300  | C -1.02009300                       | -1.43600900 | 0.20005800  |
|                | H -1.74147300                       | 1.55524100  | -1.28983300 | H -1.70547600                       | 1.64037200  | -1.06097300 |
|                | H -4.04233300                       | 0.96979700  | -0.52811200 | H -3.98294200                       | 1.00696100  | -0.31213300 |
|                | H -4.42885500                       | -1.11582500 | 0.79603900  | H -4.36773700                       | -1.19778000 | 0.77326600  |
|                | H -2.50225500                       | -2.60879200 | 1.34403300  | H -2.46024800                       | -2.75788100 | 1.10045300  |
|                | H -0.20631700                       | -2.02273000 | 0.56556400  | H -0.18638100                       | -2.11491500 | 0.34602500  |
|                | H 4.14849100                        | -2.77870600 | -0.59821400 | H 4.00658200                        | -2.87626800 | -0.43546400 |
| Reactant_PhNH2 | <b>Total Energy = -594.89799568</b> |             |             | <b>Total Energy = -595.00126664</b> |             |             |
|                | C 1.55719600                        | 1.91821600  | 0.73073600  | C 1.57288600                        | 1.87979600  | 0.69185700  |
|                | H 1.15903200                        | 1.17182300  | 1.41714700  | H 1.21128600                        | 1.11651600  | 1.37677100  |
|                | C 2.07286800                        | 3.08822000  | 1.15005700  | C 2.06481400                        | 3.04444200  | 1.11063700  |
|                | H 2.09951200                        | 3.32001000  | 2.20970800  | H 2.10972800                        | 3.26044200  | 2.17078100  |
|                | H 2.46482200                        | 3.82008400  | 0.44995400  | H 2.42068000                        | 3.79436000  | 0.41295800  |
|                | O 1.48110600                        | 1.59965300  | -0.62772300 | O 1.47596800                        | 1.57599900  | -0.63859000 |
|                | C 1.03800800                        | 0.21255300  | -0.97827400 | C 1.04034000                        | 0.23212000  | -0.96159100 |
|                | C 2.01435000                        | -0.78645300 | -0.50986200 | C 2.00324400                        | -0.77302000 | -0.49316400 |
|                | C 2.86169400                        | -1.58887100 | -0.14574500 | C 2.82940000                        | -1.57564900 | -0.12358800 |
|                | C 3.89285300                        | -2.54321300 | 0.28959400  | C 3.83385600                        | -2.53877900 | 0.31630600  |
|                | H 4.75230100                        | -2.01354200 | 0.72004200  | H 4.82778600                        | -2.07947900 | 0.34970500  |
|                | H 3.50469200                        | -3.23137400 | 1.05123200  | H 3.60924000                        | -2.92287500 | 1.31730500  |
|                | H 1.08322000                        | 0.26257700  | -2.07302700 | H 1.07004400                        | 0.24515400  | -2.05811000 |
|                | C -0.40281400                       | -0.03677100 | -0.53769300 | C -0.39898500                       | -0.01802600 | -0.51887100 |
|                | C -1.40897400                       | 0.84925500  | -0.98428400 | C -1.38012800                       | 0.92554500  | -0.85570900 |

|                |                                                                                                                                                                                                                                                                                                                                                                                                                                                                                                                                                                                                                                                                                                                                                                                                                                                                                                                                                                                                                                                                                                                                            |                                                                                                                                                                                                                                                                                                                                                                                                                                                                                                                                                                                                                                                                                                                                                                                                                                                                                                                                                                                                                                                                                                                                             |
|----------------|--------------------------------------------------------------------------------------------------------------------------------------------------------------------------------------------------------------------------------------------------------------------------------------------------------------------------------------------------------------------------------------------------------------------------------------------------------------------------------------------------------------------------------------------------------------------------------------------------------------------------------------------------------------------------------------------------------------------------------------------------------------------------------------------------------------------------------------------------------------------------------------------------------------------------------------------------------------------------------------------------------------------------------------------------------------------------------------------------------------------------------------------|---------------------------------------------------------------------------------------------------------------------------------------------------------------------------------------------------------------------------------------------------------------------------------------------------------------------------------------------------------------------------------------------------------------------------------------------------------------------------------------------------------------------------------------------------------------------------------------------------------------------------------------------------------------------------------------------------------------------------------------------------------------------------------------------------------------------------------------------------------------------------------------------------------------------------------------------------------------------------------------------------------------------------------------------------------------------------------------------------------------------------------------------|
|                | C -2.74872000 0.66748900 -0.62490700<br>C -3.12959300 -0.42313200 0.20211400<br>C -2.12279000 -1.31426200 0.64992500<br>C -0.78229900 -1.11731300 0.28226900<br>H -1.13195100 1.69795200 -1.60585500<br>H -3.50621900 1.36563300 -0.97671400<br>H -2.39374600 -2.15742100 1.28309600<br>H -0.02496000 -1.81499700 0.62997300<br>H 4.25595500 -3.14248100 -0.55497200<br>N -4.46360300 -0.61058500 0.56154400<br>H -5.17888000 0.02725400 0.24792100<br>H -4.73809100 -1.38295900 1.14889700                                                                                                                                                                                                                                                                                                                                                                                                                                                                                                                                                                                                                                                | C -2.70998500 0.73773400 -0.50392600<br>C -3.10887800 -0.41403000 0.19988100<br>C -2.12830300 -1.36055600 0.53536500<br>C -0.79592400 -1.15954800 0.18169800<br>H -1.09000800 1.82584200 -1.38945200<br>H -3.45175800 1.48754800 -0.76792500<br>H -2.41253000 -2.25495200 1.08442700<br>H -0.05367300 -1.90485200 0.44914700<br>H 3.88569300 -3.39400900 -0.36649100<br>N -4.43350300 -0.57881700 0.60310300<br>H -5.11793800 -0.07731100 0.05418700<br>H -4.71580200 -1.53283400 0.78032900                                                                                                                                                                                                                                                                                                                                                                                                                                                                                                                                                                                                                                                |
| Reactant_PhNO2 | <b>Total Energy = -744.01757330</b><br>C 2.39319700 1.85231500 0.75291400<br>H 2.24114800 1.02176600 1.44081900<br>C 2.74058000 3.08597100 1.15605800<br>H 2.87663600 3.29193200 2.21234700<br>H 2.89685900 3.89385800 0.44739700<br>O 2.22803500 1.55596500 -0.60996200<br>C 1.73729900 0.20266700 -0.95533500<br>C 2.61462800 -0.86013700 -0.43585300<br>C 3.37838400 -1.73196100 -0.04759700<br>C 4.30976000 -2.76878600 0.42166400<br>H 5.28014300 -2.32643800 0.67943900<br>H 3.92283700 -3.27903900 1.31236400<br>H 1.81647500 0.21620000 -2.05032200<br>C 0.25405200 0.05010100 -0.58201100<br>C -0.60725100 1.15343400 -0.77639000<br>C -1.97650000 1.04699100 -0.50069800<br>C -2.47507200 -0.18088200 -0.02922200<br>C -1.64256200 -1.29339800 0.17315800<br>C -0.27261400 -1.16788600 -0.10642900<br>H -0.19426400 2.09347200 -1.12859900<br>H -2.65235300 1.88313900 -0.63986300<br>H -2.06629600 -2.22149400 0.54005500<br>H 0.38895800 -2.01459700 0.04687000<br>H 4.48021100 -3.52360100 -0.35609000<br>N -3.91719100 -0.30439900 0.26289100<br>O -4.66199100 0.71836600 0.07181500<br>O -4.35272100 -1.42870200 0.69237200 | <b>Total Energy = -744.14224900</b><br>C 2.37132800 1.83122900 0.70233400<br>H 2.30985000 0.98259700 1.37945200<br>C 2.60838500 3.07302000 1.11683600<br>H 2.75121600 3.27002400 2.17187600<br>H 2.67553700 3.90199500 0.42109800<br>O 2.22570600 1.53520500 -0.63087000<br>C 1.74105100 0.21937600 -0.94951400<br>C 2.60775100 -0.84222400 -0.42223600<br>C 3.34737200 -1.70667100 -0.01105100<br>C 4.24990200 -2.74210500 0.48151600<br>H 5.23943300 -2.32439900 0.69559300<br>H 3.87096900 -3.19776400 1.40244600<br>H 1.80759300 0.19972900 -2.04509500<br>C 0.26164800 0.05963300 -0.57810300<br>C -0.58856500 1.16737900 -0.70562000<br>C -1.94691700 1.05295400 -0.43098400<br>C -2.44673000 -0.18510400 -0.03084500<br>C -1.62676200 -1.30201700 0.10204300<br>C -0.26778400 -1.17052500 -0.17314000<br>H -0.17541600 2.12245200 -1.00944600<br>H -2.61951500 1.89665200 -0.51879900<br>H -2.05587000 -2.24398800 0.41916300<br>H 0.38954800 -2.02649800 -0.06762000<br>H 4.37739100 -3.53754400 -0.26054300<br>N -3.88303500 -0.31500100 0.26234100<br>O -4.58504400 0.68821000 0.13741700<br>O -4.29735900 -1.41940400 0.61446100 |
| Product_Ph     | <b>Total Energy = -539.5822027</b><br>C -3.23834000 1.22306300 -0.50276900<br>H -2.33726300 1.86180600 -0.39546000<br>C -2.94467300 -0.22686100 -0.87156700<br>H -2.44686900 -0.23202800 -1.85055700<br>H -3.89500700 -0.76889800 -0.95227900<br>O -4.37580600 1.68915400 -0.31896100<br>C 0.51406700 -1.40411300 -0.36269000<br>C -0.75549800 -1.12597500 -0.08418600<br>C -2.03049600 -0.88078800 0.17545500<br>C -2.67710900 -1.21041800 1.51661800<br>H -1.95540000 -1.64773600 2.21273300<br>H -3.10466100 -0.30928700 1.97878300<br>H -3.50216800 -1.92319300 1.37694100                                                                                                                                                                                                                                                                                                                                                                                                                                                                                                                                                             | <b>Total Energy = -539.6848573</b><br>C -3.11246600 1.22821000 -0.61550500<br>H -2.20588300 1.85156400 -0.78654800<br>C -2.92345000 -0.24792100 -0.92322400<br>H -2.44607300 -0.34821200 -1.90316500<br>H -3.90747800 -0.72798500 -0.94133500<br>O -4.13142700 1.71163300 -0.17568900<br>C 0.48369600 -1.42859700 -0.32166300<br>C -0.77609600 -1.13943000 -0.07584700<br>C -2.03963100 -0.87476300 0.15548400<br>C -2.70252900 -1.13369500 1.49333200<br>H -1.98365800 -1.48990600 2.23324700<br>H -3.17845800 -0.22246300 1.87362900<br>H -3.49424400 -1.88550200 1.38673500                                                                                                                                                                                                                                                                                                                                                                                                                                                                                                                                                              |

|       |                                                                                                                                                                                                                                                                                                                                                                                                                                                                                                                                                                                                                                                                                                                                                                                                                                                                                                                                                                                                                                                                                                                         |                                                                                                                                                                                                                                                                                                                                                                                                                                                                                                                                                                                                                                                                                                                                                                                                                                                                                                                                                                                                                                                                                                                          |
|-------|-------------------------------------------------------------------------------------------------------------------------------------------------------------------------------------------------------------------------------------------------------------------------------------------------------------------------------------------------------------------------------------------------------------------------------------------------------------------------------------------------------------------------------------------------------------------------------------------------------------------------------------------------------------------------------------------------------------------------------------------------------------------------------------------------------------------------------------------------------------------------------------------------------------------------------------------------------------------------------------------------------------------------------------------------------------------------------------------------------------------------|--------------------------------------------------------------------------------------------------------------------------------------------------------------------------------------------------------------------------------------------------------------------------------------------------------------------------------------------------------------------------------------------------------------------------------------------------------------------------------------------------------------------------------------------------------------------------------------------------------------------------------------------------------------------------------------------------------------------------------------------------------------------------------------------------------------------------------------------------------------------------------------------------------------------------------------------------------------------------------------------------------------------------------------------------------------------------------------------------------------------------|
|       | H 0.73874600 -2.38280900 -0.79520900<br>C 1.68520400 -0.51975300 -0.15045900<br>C 1.57214300 0.76635300 0.43307000<br>C 2.70761300 1.57132900 0.61416300<br>C 3.97992600 1.10952700 0.21666200<br>C 4.10401300 -0.16744900 -0.36256900<br>C 2.96651200 -0.97406200 -0.54332200<br>H 0.59437400 1.12550800 0.74637700<br>H 2.60619600 2.55626400 1.06452000<br>H 5.08097600 -0.53213200 -0.67098700<br>H 3.06943200 -1.96094300 -0.99159500<br>H 4.85791600 1.73510900 0.35798500                                                                                                                                                                                                                                                                                                                                                                                                                                                                                                                                                                                                                                        | H 0.71264200 -2.42350800 -0.70789500<br>C 1.64504800 -0.53876200 -0.12908000<br>C 1.51870100 0.75913700 0.39569700<br>C 2.63746700 1.56921000 0.56119700<br>C 3.90722000 1.10198000 0.20774800<br>C 4.04608700 -0.18478200 -0.31255300<br>C 2.92507600 -0.99712500 -0.47846000<br>H 0.53428600 1.12408900 0.67416800<br>H 2.52122100 2.56941100 0.96885700<br>H 5.02769500 -0.55824600 -0.58966300<br>H 3.03785100 -1.99939600 -0.88401700<br>H 4.77878300 1.73632000 0.33873800                                                                                                                                                                                                                                                                                                                                                                                                                                                                                                                                                                                                                                         |
| TS_Ph | <b>Total Energy (Boat) = -539.5100001,</b><br><b>Frequency = -369.7238 cm<sup>-1</sup></b><br>C -1.65205400 -1.44583700 1.07836900<br>H -1.23351500 -1.23401600 2.07289500<br>C -2.97601400 -1.09680700 0.82337500<br>H -3.62061900 -0.77076400 1.63832200<br>H -3.45149300 -1.40976800 -0.10201600<br>O -0.82844200 -1.84674200 0.12851200<br>C -0.22864500 -0.30668800 -1.04687400<br>C -1.33280600 0.52650900 -0.90182000<br>C -2.44140700 0.87463100 -0.43082800<br>C -3.63465000 1.72682800 -0.23632800<br>H -0.22958100 -0.98818100 -1.89607500<br>C 1.10586900 0.01238400 -0.49555300<br>C 2.20361600 -0.80869800 -0.84662300<br>C 3.48235500 -0.55295300 -0.32711100<br>C 3.68371200 0.53039400 0.55182500<br>C 2.59618200 1.35505800 0.90534100<br>C 1.31707500 1.10031700 0.38503000<br>H 2.04442900 -1.65533300 -1.51088200<br>H 4.31757800 -1.19286300 -0.60102400<br>H 2.74971700 2.19448600 1.57956600<br>H 0.48077300 1.74327300 0.64804600<br>H 4.67420400 0.73070600 0.95363700<br>H -3.71281500 2.06794800 0.80300300<br>H -3.57527700 2.61283200 -0.88261400<br>H -4.55526400 1.18480200 -0.48378200 | <b>Total Energy (Boat) = -539.6051151,</b><br><b>Frequency = -388.1644 cm<sup>-1</sup></b><br>C -1.59768000 -1.40862700 1.06968900<br>H -1.15809100 -1.16440900 2.05074200<br>C -2.92378500 -1.10516800 0.85511800<br>H -3.55392700 -0.78056000 1.67827100<br>H -3.41233900 -1.43939400 -0.05287900<br>O -0.81492700 -1.81443100 0.13186700<br>C -0.24364700 -0.34611900 -1.03727000<br>C -1.32531700 0.51192200 -0.93563600<br>C -2.40926500 0.86922700 -0.45141700<br>C -3.58828200 1.71434700 -0.23636400<br>H -0.23098500 -1.01529900 -1.89373200<br>C 1.08480800 -0.00824800 -0.49277100<br>C 2.18890400 -0.80517400 -0.83563000<br>C 3.45184800 -0.52820100 -0.31942200<br>C 3.63157000 0.55080200 0.54911200<br>C 2.53969700 1.35033800 0.89645900<br>C 1.27648300 1.07545700 0.37945000<br>H 2.04648400 -1.65126900 -1.50202100<br>H 4.29645500 -1.15340200 -0.59369400<br>H 2.67509500 2.19304100 1.56826300<br>H 0.42877400 1.70180000 0.63891700<br>H 4.61686500 0.76951700 0.95016100<br>H -3.66336600 2.03533800 0.80747300<br>H -3.52491600 2.61088100 -0.86360900<br>H -4.51263500 1.18586900 -0.49073000 |
|       | <b>Total Energy (Chair) = -539.5096829,</b><br><b>Frequency = -362.4901 cm<sup>-1</sup></b><br>C 2.07469800 1.76050300 0.56209400<br>H 2.72507900 2.49361100 0.06260100<br>C 2.67230400 0.74852600 1.30726200<br>H 3.74072400 0.78322300 1.51387600<br>H 2.06377600 0.07616700 1.90491300<br>O 0.78381600 1.78388900 0.27990700<br>C 0.22351100 0.32424100 -0.99639100<br>C 1.31809200 -0.52851300 -0.89082100<br>C 2.43731300 -0.88737600 -0.45628400<br>C 3.67453900 -1.69048100 -0.35670500<br>H 0.23755400 1.04076600 -1.81704000<br>C -1.11886500 0.00053900 -0.47147300<br>C -2.19834600 0.85874400 -0.78510200                                                                                                                                                                                                                                                                                                                                                                                                                                                                                                   | <b>Total Energy = -539.6048925, Frequency = -388.1415 cm<sup>-1</sup></b><br>C 2.03116800 1.74076800 0.53803700<br>H 2.67135200 2.47501100 0.02086300<br>C 2.64278200 0.77346500 1.30207400<br>H 3.70770500 0.82917800 1.50744800<br>H 2.04561000 0.10080500 1.90610500<br>O 0.76935600 1.74249100 0.27420600<br>C 0.24003800 0.34316100 -0.97456000<br>C 1.30522900 -0.53903900 -0.89560500<br>C 2.41072500 -0.88752700 -0.45652500<br>C 3.63979100 -1.67775000 -0.33719000<br>H 0.24921800 1.02901900 -1.81828200<br>C -1.10324300 0.01354900 -0.46295700<br>C -2.17750800 0.86579400 -0.75978600                                                                                                                                                                                                                                                                                                                                                                                                                                                                                                                      |

|          |                                                                                                                                                                                                                                                                                                                                                                                                                                                                                                                                                                                                                                                                                                                                                                                                                                                                                                                                                                                                                                                                                                                                                                                                       |                                                                                                                                                                                                                                                                                                                                                                                                                                                                                                                                                                                                                                                                                                                                                                                                                                                                                                                                                                                                                                                                                                                                                                                                      |
|----------|-------------------------------------------------------------------------------------------------------------------------------------------------------------------------------------------------------------------------------------------------------------------------------------------------------------------------------------------------------------------------------------------------------------------------------------------------------------------------------------------------------------------------------------------------------------------------------------------------------------------------------------------------------------------------------------------------------------------------------------------------------------------------------------------------------------------------------------------------------------------------------------------------------------------------------------------------------------------------------------------------------------------------------------------------------------------------------------------------------------------------------------------------------------------------------------------------------|------------------------------------------------------------------------------------------------------------------------------------------------------------------------------------------------------------------------------------------------------------------------------------------------------------------------------------------------------------------------------------------------------------------------------------------------------------------------------------------------------------------------------------------------------------------------------------------------------------------------------------------------------------------------------------------------------------------------------------------------------------------------------------------------------------------------------------------------------------------------------------------------------------------------------------------------------------------------------------------------------------------------------------------------------------------------------------------------------------------------------------------------------------------------------------------------------|
|          | C -3.48568100 0.59837900 -0.28808900<br>C -3.71183300 -0.52777300 0.52791100<br>C -2.64137000 -1.38982600 0.84353400<br>C -1.35424700 -1.12823500 0.34822400<br>H -2.01976500 1.73661200 -1.40226600<br>H -4.30743600 1.26750300 -0.53105900<br>H -2.81450400 -2.26062300 1.47158700<br>H -0.52897700 -1.79498700 0.58568200<br>H -4.70845400 -0.73208900 0.91227800<br>H 3.80749400 -2.09660800 0.65309500<br>H 3.63627000 -2.53197600 -1.06159500<br>H 4.55703100 -1.08507600 -0.59629300                                                                                                                                                                                                                                                                                                                                                                                                                                                                                                                                                                                                                                                                                                           | C -3.45363500 0.59427300 -0.27227000<br>C -3.67381300 -0.53565000 0.51791000<br>C -2.61007900 -1.39055400 0.81907800<br>C -1.33422900 -1.11855900 0.33360900<br>H -2.00241900 1.75010100 -1.36603100<br>H -4.27619300 1.26286800 -0.50844700<br>H -2.77769700 -2.27172600 1.43157600<br>H -0.50628000 -1.78346900 0.55948400<br>H -4.66908300 -0.75074300 0.89574100<br>H 3.75786000 -2.09122800 0.66938900<br>H 3.61814000 -2.51200500 -1.04775400<br>H 4.52359000 -1.06933400 -0.55462100                                                                                                                                                                                                                                                                                                                                                                                                                                                                                                                                                                                                                                                                                                          |
| TS_PhNH2 | <b>Total Energy (Chair) = -594.86394796,</b><br><b>Frequency = -316.7991 cm<sup>-1</sup></b><br>C 2.57434600 1.66628800 0.73377100<br>H 3.29972900 2.38127800 0.31423900<br>C 3.07134800 0.58972200 1.46222500<br>H 4.12770700 0.54748300 1.72286300<br>H 2.39411200 -0.08472900 1.97843500<br>O 1.30812700 1.79251100 0.38597300<br>C 0.69953800 0.40439100 -1.03439600<br>C 1.75329800 -0.49705800 -0.90806700<br>C 2.82496500 -0.95741000 -0.45733700<br>C 4.01471700 -1.82539900 -0.34105900<br>H 0.80926100 1.18453300 -1.78629500<br>C -0.67225700 0.12895700 -0.60705000<br>C -1.70190100 1.04288300 -0.94085600<br>C -3.02124400 0.83612700 -0.53007900<br>C -3.36018400 -0.30855800 0.23971800<br>C -2.33259000 -1.23191400 0.57697300<br>C -1.01794900 -1.01063600 0.16164600<br>H -1.45418300 1.93332700 -1.51507500<br>H -3.79519900 1.55448600 -0.79353100<br>H -2.57914900 -2.11483200 1.16426400<br>H -0.24173000 -1.72455300 0.42648600<br>H 4.06743500 -2.30068400 0.64574400<br>H 3.98276200 -2.61816300 -1.10118100<br>H 4.93674400 -1.24984400 -0.48719800<br>N -4.67055300 -0.52538600 0.65271400<br>H -5.40016100 0.13424900 0.42897000<br>H -4.91099100 -1.32929700 1.21256500 | <b>Total Energy (Chair) = -594.96515139,</b><br><b>Frequency = -350.9187 cm<sup>-1</sup></b><br>C -2.53222500 -1.64303100 0.70260800<br>H -3.24567000 -2.36128700 0.26156400<br>C -3.04641500 -0.60840700 1.44907900<br>H -4.10136100 -0.58723400 1.70610800<br>H -2.38188700 0.06630700 1.97588300<br>O -1.29010900 -1.74489300 0.37908600<br>C -0.71592000 -0.43443200 -0.99963800<br>C -1.73395800 0.50342200 -0.91543400<br>C -2.79031000 0.96240300 -0.46486000<br>C -3.96514800 1.82737900 -0.33281100<br>H -0.81701600 -1.18114300 -1.78314100<br>C 0.65836100 -0.15477200 -0.58267400<br>C 1.68405000 -1.05997700 -0.90193900<br>C 2.99394000 -0.83825400 -0.50297300<br>C 3.32845800 0.30963000 0.23933500<br>C 2.30408400 1.22064000 0.56450400<br>C 0.99850100 0.98735600 0.16255400<br>H 1.44365300 -1.95642800 -1.46691100<br>H 3.76979800 -1.55522100 -0.75912400<br>H 2.54509300 2.11187000 1.13861600<br>H 0.22081900 1.70125300 0.41654600<br>H -4.00242800 2.30981400 0.64905800<br>H -3.94205100 2.61320300 -1.09702100<br>H -4.89138100 1.25768300 -0.45978000<br>N 4.62773300 0.51531800 0.68431100<br>H 5.35453700 0.03414500 0.17438300<br>H 4.87414500 1.46721100 0.91444500 |
| TS_PhNO2 | <b>Total Energy (Chair) = -743.98245718,</b><br><b>Frequency = -372.8858 cm<sup>-1</sup></b><br>C -3.18413700 -1.52628800 0.95708600<br>H -3.93327400 -2.27081900 0.65425200<br>C -3.61882800 -0.35417800 1.56785300<br>H -4.65754600 -0.25570200 1.87803300<br>H -2.90039300 0.34885600 1.97896300<br>O -1.93422200 -1.70836600 0.56310200<br>C -1.44962000 -0.56128000 -1.00204200<br>C -2.44268900 0.41046500 -0.93794600<br>C -3.46940900 0.94944100 -0.46306800<br>C -4.61412600 1.88018200 -0.37478200<br>H -1.61677900 -1.39391200 -1.68422500                                                                                                                                                                                                                                                                                                                                                                                                                                                                                                                                                                                                                                                 | <b>Total Energy (Chair) = -744.10495879,</b><br><b>Frequency = -401.7594 cm<sup>-1</sup></b><br>C -3.14706500 -1.51176600 0.91458400<br>H -3.89609500 -2.25173900 0.59049900<br>C -3.58546200 -0.37717200 1.55792700<br>H -4.62143500 -0.29119100 1.87150100<br>H -2.87028500 0.31856900 1.98015700<br>O -1.92476300 -1.67722600 0.53460100<br>C -1.45232500 -0.56892900 -0.97641600<br>C -2.41365600 0.42732500 -0.94433200<br>C -3.42602300 0.95392500 -0.45909600<br>C -4.55762300 1.87946800 -0.34908300<br>H -1.61407700 -1.37145700 -1.69185700                                                                                                                                                                                                                                                                                                                                                                                                                                                                                                                                                                                                                                                |

|   |             |             |             |   |             |             |             |
|---|-------------|-------------|-------------|---|-------------|-------------|-------------|
| C | -0.03303800 | -0.29332800 | -0.67252900 | C | -0.03504400 | -0.30370200 | -0.65620700 |
| C | 0.91714100  | -1.32403000 | -0.86639300 | C | 0.91023300  | -1.32642300 | -0.83826800 |
| C | 2.26521900  | -1.12654600 | -0.54638000 | C | 2.24834400  | -1.12342000 | -0.52428200 |
| C | 2.65692400  | 0.12225200  | -0.03064000 | C | 2.63504200  | 0.11969600  | -0.02608900 |
| C | 1.73680600  | 1.16760500  | 0.17284700  | C | 1.72144400  | 1.15553100  | 0.16720000  |
| C | 0.39275200  | 0.95166000  | -0.15083000 | C | 0.38709500  | 0.93622700  | -0.14963600 |
| H | 0.58928100  | -2.28602400 | -1.25047500 | H | 0.58602900  | -2.29097600 | -1.21576900 |
| H | 3.00583600  | -1.90617300 | -0.68327400 | H | 2.99144100  | -1.89936900 | -0.65635800 |
| H | 2.08419400  | 2.11424200  | 0.57109300  | H | 2.06845700  | 2.10481800  | 0.55481900  |
| H | -0.33405100 | 1.74618300  | -0.00947600 | H | -0.34081800 | 1.72930800  | -0.01508600 |
| H | -4.59291600 | 2.45395200  | 0.55915800  | H | -4.52092000 | 2.45324700  | 0.58215700  |
| H | -4.58729300 | 2.58946000  | -1.21272800 | H | -4.54217600 | 2.58626700  | -1.18637400 |
| H | -5.56613900 | 1.33789300  | -0.41835600 | H | -5.51094200 | 1.34215100  | -0.37553400 |
| N | 4.07483600  | 0.34524100  | 0.30412700  | N | 4.04982900  | 0.34777300  | 0.30189300  |
| O | 4.90134800  | -0.61315900 | 0.10911600  | O | 4.83753800  | -0.58004300 | 0.11602000  |
| O | 4.41328100  | 1.48772800  | 0.77391700  | O | 4.36375600  | 1.45369400  | 0.74322600  |

**HOMA (harmonic oscillator model of aromaticity):** The HOMA, a geometry-based criterion for aromaticity, was calculated using following equation.

$$r\text{HOMA} = 1 - \sum \alpha / n (R_0 - R_i)^2,$$

$$\alpha = 2\{(R_0 - R_S)^2 - (R_0 - R_D)^2\}^{-1}$$

$R_0$  = Values corresponding to the bond distances in the Claisen rearrangement of the allyl vinyl ether

$\alpha$  = normalizing factor

$n$  = number of bonds involved

$R_D$  = Double bond

$R_S$  = Single bond

$R_i$  = Bond length under investigation

$R_{S(C-O)}$ : 1.425 Å

$R_{D(C=O)}$ : 1.202 Å

$R_{S(C-C)}$ : 1.530 Å

$R_{S(C=C)}$ : 1.329 Å

For standard HOMA calculations,  $R_0$  is the C=C bond distance in fully aromatic benzene ring.

However in order to calculate the aromaticity of the transition states, we took the  $R_0$  bond

distances from the optimized geometry of the cyclic aromatic transition state of the allyl vinyl ether Claisen rearrangements. Thus, the HOMA in the present study is relative to the HOMA values of the TS of the allyl vinyl ether.

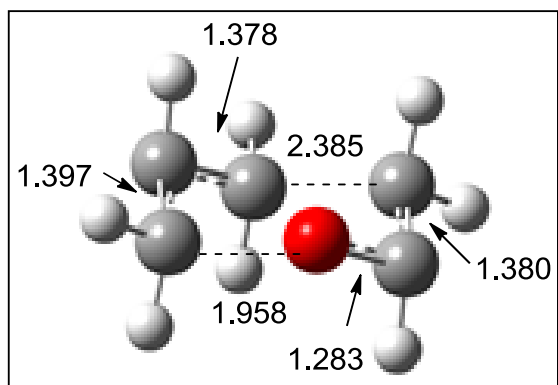

**Figure 2** Optimized geometry for the transition states of the Claisen rearrangement of the allyl vinyl ether calculated at B3LYP/6-311+G\*\* level by the Schleyer group.

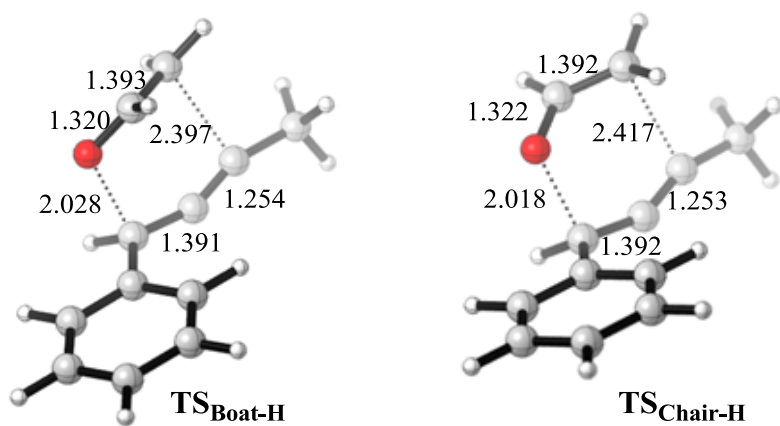

**Figure 3** B3LYP/6-31G(d,p) transition state structures for the uncatalyzed Claisen rearrangement of the phenyl-substituted propargyl vinyl ether with selected bond distances.

**Isotropic Shifts of Bq calculated at the geometric center of the transition state ring.**

| <u>Uncatalyzed Rearrangement</u> |                                             |
|----------------------------------|---------------------------------------------|
| TS <sub>PhNH<sub>2</sub></sub>   | Bq Isotropic = 17.5677 Anisotropy = 24.7684 |
|                                  | XX= 16.2067 YX= 8.6287 ZX= 11.7000          |
|                                  | XY= 9.6791 YY= 15.4964 ZY= 7.7754           |
|                                  | XZ= 8.5132 YZ= 2.1051 ZZ= 20.9998           |
|                                  | Eigenvalues: 5.4628 13.1602 34.0800         |

|                                                                          |                                                                                                                                                                                                       |
|--------------------------------------------------------------------------|-------------------------------------------------------------------------------------------------------------------------------------------------------------------------------------------------------|
| TS <sub>Ph</sub>                                                         | Bq Isotropic = 18.8452 Anisotropy = 28.4570<br>XX= 14.4757 YX= 10.6374 ZX= 9.9223<br>XY= 9.0070 YY= 19.7603 ZY= 6.9618<br>XZ= 11.5161 YZ= 8.3066 ZZ= 22.2996<br>Eigenvalues: 5.4028 13.3163 37.8165   |
| TS <sub>PhNO<sub>2</sub></sub>                                           | Bq Isotropic = 19.2135 Anisotropy = 27.7936<br>XX= 19.7488 YX= 10.4626 ZX= 12.5174<br>XY= 11.8479 YY= 17.3882 ZY= 8.5214<br>XZ= 8.4856 YZ= 2.8960 ZZ= 20.5036<br>Eigenvalues: 6.4196 13.4784 37.7426  |
| <u>Gold(I)-catalyzed cyclization-mediated rearrangement</u>              |                                                                                                                                                                                                       |
| TS <sub>PhNH<sub>2</sub></sub>                                           | Bq Isotropic = 12.7905 Anisotropy = 10.7503<br>XX= 15.1347 YX= 2.3371 ZX= 0.8421<br>XY= 0.0225 YY= 8.8693 ZY= -4.6831<br>XZ= 4.2362 YZ= -10.1135 ZZ= 14.3676<br>Eigenvalues: 3.2296 15.1846 19.9574   |
| TS <sub>Ph</sub>                                                         | Bq Isotropic = 12.8404 Anisotropy = 10.8675<br>XX= 14.3811 YX= 3.5968 ZX= -1.6612<br>XY= 1.8336 YY= 8.6861 ZY= 3.8462<br>XZ= -6.0384 YZ= 8.8852 ZZ= 15.4538<br>Eigenvalues: 3.1698 15.2659 20.0853    |
| TS <sub>PhNO<sub>2</sub></sub>                                           | Bq Isotropic = 13.2140 Anisotropy = 10.3801<br>XX= 15.4222 YX= 0.3007 ZX= -1.3065<br>XY= -1.3315 YY= 9.5023 ZY= -4.5139<br>XZ= 0.5400 YZ= -10.6634 ZZ= 14.7174<br>Eigenvalues: 4.0495 15.4584 20.1340 |
| <u>Gold(I)-catalyzed cation-accelerated oxonia Claisen rearrangement</u> |                                                                                                                                                                                                       |
| TS <sub>PhNH<sub>2</sub></sub>                                           | Bq Isotropic = 12.5498 Anisotropy = 11.7573<br>XX= 10.6661 YX= -3.4061 ZX= -0.2171<br>XY= -7.2406 YY= 11.1814 ZY= 5.1046<br>XZ= 1.2299 YZ= 6.1623 ZZ= 15.8018<br>Eigenvalues: 3.9136 13.3477 20.3880  |
| TS <sub>PhOMe</sub>                                                      | Bq Isotropic = 14.0190 Anisotropy = 16.0978<br>XX= 11.0207 YX= -3.9256 ZX= -1.0600<br>XY= -7.8432 YY= 12.0895 ZY= 7.1136<br>XZ= 0.4725 YZ= 7.9691 ZZ= 18.9468<br>Eigenvalues: 3.7845 13.5216 24.7508  |
| TS <sub>Ph</sub>                                                         | Bq Isotropic = 15.6001 Anisotropy = 19.9677<br>XX= 7.6113 YX= -2.2600 ZX= 1.6460<br>XY= -5.9551 YY= 16.1904 ZY= 8.6394<br>XZ= 2.6228 YZ= 8.6752 ZZ= 22.9985<br>Eigenvalues: 4.1560 13.7323 28.9118    |
| TS <sub>PhCN</sub>                                                       | Bq Isotropic = 15.6693 Anisotropy = 19.7918<br>XX= 7.0803 YX= 0.7302 ZX= 3.4430<br>XY= 4.2906 YY= 18.1113 ZY= -8.7324<br>XZ= 4.3380 YZ= -8.4702 ZZ= 21.8162                                           |



|                                                                                 |                                                                                                                                                                                                    |
|---------------------------------------------------------------------------------|----------------------------------------------------------------------------------------------------------------------------------------------------------------------------------------------------|
|                                                                                 | Eigenvalues: 4.2132 13.9307 28.8638                                                                                                                                                                |
| TS <sub>PhCF<sub>3</sub></sub>                                                  | Bq Isotropic = 15.6086 Anisotropy = 20.1185<br>XX= 9.5591 YX= 6.0679 ZX= 8.9198<br>XY= 3.0664 YY= 16.1126 ZY= 4.6490<br>XZ= 9.4836 YZ= 3.9349 ZZ= 21.1542<br>Eigenvalues: 4.1239 13.6810 29.0210   |
| TS <sub>PhNO<sub>2</sub></sub>                                                  | Bq Isotropic = 15.7083 Anisotropy = 19.3978<br>XX= 7.1963 YX= 3.2945 ZX= 6.4989<br>XY= 0.3981 YY= 18.8494 ZY= 6.9785<br>XZ= 6.9445 YZ= 6.3599 ZZ= 21.0792<br>Eigenvalues: 4.4230 14.0617 28.6402   |
| <u>Claisen rearrangement <i>via</i>. gold(I)-coordinated to the vinyl ether</u> |                                                                                                                                                                                                    |
| TS <sub>PhNH<sub>2</sub></sub>                                                  | Bq Isotropic = 8.1015 Anisotropy = 6.7593<br>XX= 11.8809 YX= -1.8059 ZX= -2.2257<br>XY= -0.9433 YY= 9.5520 ZY= -0.9927<br>XZ= -0.4956 YZ= -0.5322 ZZ= 2.8717<br>Eigenvalues: 2.5375 9.1594 12.6077 |
| TS <sub>PhOMe</sub>                                                             | Bq Isotropic = 8.7569 Anisotropy = 5.8700<br>XX= 12.0097 YX= -1.9754 ZX= -1.4243<br>XY= -0.7504 YY= 9.7318 ZY= -0.5363<br>XZ= 0.1555 YZ= -0.1303 ZZ= 4.5293<br>Eigenvalues: 4.4365 9.1640 12.6702  |
| TS <sub>Ph</sub>                                                                | Bq Isotropic = 9.9398 Anisotropy = 4.6780<br>XX= 12.7880 YX= -1.6920 ZX= -0.1145<br>XY= -0.1436 YY= 9.3781 ZY= 0.5065<br>XZ= 1.4148 YZ= 0.9511 ZZ= 7.6534<br>Eigenvalues: 7.2277 9.5333 13.0585    |
| TS <sub>PhCl</sub>                                                              | Bq Isotropic = 10.2233 Anisotropy = 4.5354<br>XX= 12.8379 YX= -1.8512 ZX= 0.3673<br>XY= -0.0790 YY= 9.9281 ZY= 0.3570<br>XZ= 1.5761 YZ= 0.6731 ZZ= 7.9039<br>Eigenvalues: 7.5133 9.9097 13.2470    |
| TS <sub>PhCN</sub>                                                              | Bq Isotropic = 10.9980 Anisotropy = 4.5166<br>XX= 13.2248 YX= -1.7761 ZX= 1.2307<br>XY= 0.2388 YY= 10.0816 ZY= 0.9332<br>XZ= 2.3749 YZ= 1.0998 ZZ= 9.6877<br>Eigenvalues: 8.1389 10.8460 14.0091   |
| TS <sub>PhNO<sub>2</sub></sub>                                                  | Bq Isotropic = 11.7102 Anisotropy = 5.5768<br>XX= 13.6864 YX= -1.7417 ZX= 2.1478<br>XY= 0.3422 YY= 10.2650 ZY= 1.2829<br>XZ= 3.2852 YZ= 1.3796 ZZ= 11.1792<br>Eigenvalues: 8.2980 11.4045 15.4281  |
